# Supplementary material
Source: PubMed Central journal article supplement (PMC2803312)

**Enantioselective, Thiourea-Catalyzed Asymmetric Intermolecular Addition of Indoles to Cyclic  
N-Acyliminium ions**

Emily A. Peterson and Eric N. Jacobsen\*

*Department of Chemistry and Chemical Biology, Harvard University; Cambridge, MA 02138*

|                                                                                                          |            |
|----------------------------------------------------------------------------------------------------------|------------|
| <b>A. General Information</b>                                                                            | <b>S1</b>  |
| <b>B. Synthesis of Catalyst 5</b>                                                                        | <b>S2</b>  |
| <b>C. Synthesis of N-acyliminium ion precursors</b>                                                      | <b>S5</b>  |
| <b>D. General Procedure for the synthesis of racemic 5-(1<i>H</i>-indol-3-yl)pyrrolidin-2-ones</b>       | <b>S6</b>  |
| <b>E. General Procedures for the preparation of enantioenriched 5-(indol-3-yl)pyrrolidin-2-ones (2).</b> | <b>S6</b>  |
| <b>F. Chiral SFC data</b>                                                                                | <b>S16</b> |
| <b>G. <sup>1</sup>H and <sup>13</sup>C NMR Spectra</b>                                                   | <b>S38</b> |
| <b>H. <sup>1</sup>H and <sup>13</sup>C NMR of chlorolactam intermediate 7 and related compounds</b>      | <b>S68</b> |

**A. General Information**

**Materials.** Commercial reagents were used as received. All solvents were used after being freshly distilled, unless otherwise noted.

**Instrumentation.** Proton nuclear magnetic resonance (<sup>1</sup>H NMR) spectra and carbon nuclear magnetic resonance (<sup>13</sup>C NMR) were obtained using a Varian Inova (500 MHz) spectrometer. Chiral Super-Fluid Chromatography (SFC) Analysis was performed on a Berger Instrument. Infrared spectra were obtained using a Mattson Galaxy Series FTIR 3000 spectrophotometer.

**General Procedures.** All reactions were conducted in oven or flame-dried flasks under nitrogen atmosphere. Stainless steel needles and cannulae were used to transfer air and moisture sensitive liquids. Unless otherwise specified, flash chromatography was performed using silica gel 60 (230-400 mesh) from EM Science. The molarities indicated for organolithium reagents were established by titration with BHT and phenanthroline.

## B. Synthesis of Catalyst 5

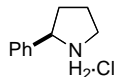

**(R)-2-phenylpyrrolidine hydrochloride (8).** To a flask charged with (*R*)-2-phenyl-*N*-Boc-pyrrolidine (1.51 g, 6.12 mmol), was added CH<sub>2</sub>Cl<sub>2</sub> (10 mL) followed by HCl in dioxane (7.6 mL, 30.6 mmol, 4N). The solution was stirred at rt for 3 h at which time it was concentrated *in vacuo* and subjected to high vacuum (<1 Torr) for 2 h to afford the crude salt as a colorless solid which was of sufficient purity for further use in a subsequent step.

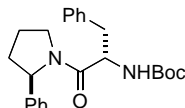

**tert-butyl (S)-1-oxo-3-phenyl-1-((R)-2-phenylpyrrolidin-1-yl)propan-2-ylcarbamate (9).** A CH<sub>2</sub>Cl<sub>2</sub> (10 mL) solution of HBTU (2.20 g, 5.81 mmol), Boc-(L)-Phenylalanine (1.54 g, 5.81 mmol), and diisopropylamine (3.0 mL, 16.71 mmol) was added to a CH<sub>2</sub>Cl<sub>2</sub> solution of (*R*)-2-phenylpyrrolidine hydrochloride **8** (crude product from previous step, assume ~6.2 mmol) in CH<sub>2</sub>Cl<sub>2</sub> (10 mL). An additional 10 mLs of CH<sub>2</sub>Cl<sub>2</sub> was used to rinse any reagent residue to ensure complete. The resulting heterogeneous mixture was stirred under N<sub>2</sub> at rt for 18 h. The reaction is diluted with Et<sub>2</sub>O (200 mL), and washed with 0.5N HCl (2x 100 mL). The acidic aqueous layer is extracted with 100 mL Et<sub>2</sub>O, and the combined organics are washed with saturated aqueous NaHCO<sub>3</sub> (1x 150 mL) and brine (1x 50 mL). The organics are dried over MgSO<sub>4</sub>, filtered, and concentrated *in vacuo*. The oily residue was purified on silica gel (8:2 CH<sub>2</sub>Cl<sub>2</sub>:EtOAc) to yield 2.28 g (95% yield from (*R*)-2-phenyl-*N*-Boc-pyrrolidine) of **9** as a colorless foam:  $[\alpha]_D^{28} = +110$  ( $c = 1.8$  g/100 mL, MeOH); <sup>1</sup>H NMR (500 MHz, CDCl<sub>3</sub>, 1:1 mixture of rotamers) 7.42–7.12 (m, 20H); 6.62–6.59 (m, 2H); 5.43 (d,  $J = 6.5$  Hz, 1H); 5.34 (d,  $J = 9.5$  Hz, 1H); 5.12 (d,  $J = 8.5$  Hz, 1H); 5.08 (d,  $J = 9.0$  Hz, 1H); 4.74 (dd,  $J = 16.5, 7.5$  Hz, 1H); 4.47 (ddd,  $J = 9.0, 9.0, 4.5$  Hz, 1H); 3.87–3.76 (m, 4H); 3.04 (d,  $J = 7.5$  Hz, 2H); 2.76 (dd,  $J = 16.5, 7.5$  Hz, 1H); 2.58 (m, 3 H); 2.07–1.94 (m, 4H); 1.82–1.75 (m, 2H); 1.56–1.47 (m, 1H) 1.50 (s, 9H); 1.36 (s, 9H); <sup>13</sup>C NMR (125 MHz, CDCl<sub>3</sub>, mixture of rotamers)  $\delta$  172.3, 170.5, 155.7, 155.4, 144.1, 142.8, 137.1, 136.9, 129.8, 129.4, 129.2, 128.7, 128.5, 129.3, 127.7, 127.2, 126.8, 126.5, 126.1, 125.6, 79.9, 79.6, 61.9, 60.8, 54.1, 53.3, 47.5, 47.3, 39.8, 39.0, 36.5, 34.1, 28.55, 28.47, 23.3, 22.1, 21.3; IR (film) 2977, 1707, 1636, 1494, 1449, 1365, 1170 cm<sup>-1</sup>; HRMS (ESI) calcd for C<sub>24</sub>H<sub>30</sub>N<sub>2</sub>O<sub>3</sub> (M+H)  $m/z$  395.2329; found 395.2340.

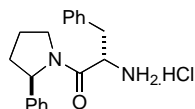

**(S)-2-amino-3-phenyl-1-((R)-2-phenylpyrrolidin-1-yl)propan-1-one hydrochloride (10).** To a flask charged with **9** (2.28 g, 5.78 mmol), was added CH<sub>2</sub>Cl<sub>2</sub> (10 mL) followed by HCl in dioxane (7.5 mL, 30.0 mmol, 4N). The solution was stirred at rt for 3 h at which time it was concentrated *in vacuo* and subjected to high vacuum (<1 Torr) for 2 h to afford the crude salt **10** as a colorless solid which was of sufficient purity for further use in a subsequent step.

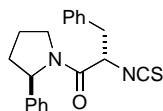

**(S)-2-isothiocyanato-3-phenyl-1-((R)-2-phenylpyrrolidin-1-yl)propan-1-one (11).** To a solution of crude **10** (~5.81 mmol) in CH<sub>2</sub>Cl<sub>2</sub> (20 mL) at 0 °C was saturated aqueous NaHCO<sub>3</sub> (20 mL), and the biphasic mixture was stirred vigorously (~500 rpm) for 10 minutes. The stirring was stopped, and thiophosgene (1.5 mL, 5.8 mmol) was added *via* syringe to the organic layer. Immediately, vigorous stirring was restored, and the reaction is removed from the ice bath, and allowed to stir for 30 min at room temperature. The layers were separated and the aqueous layer extracted with CH<sub>2</sub>Cl<sub>2</sub> (2 x 50 mL). The combined organics were dried (Na<sub>2</sub>SO<sub>4</sub>), filtered, concentrated *in vacuo*, and subjected to high vacuum (≤1 Torr) for 10 min, to afford isothiocyanate **11** as an orange oil. The isothiocyanate is sufficiently pure to use in the next step.

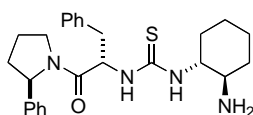

**1-((1R,2R)-2-aminocyclohexyl)-3-((S)-1-oxo-3-phenyl-1-((R)-2-phenylpyrrolidin-1-yl)propan-2-yl)thiourea (12).** In a flame-dried 100 mL round-bottomed flask, (*R,R*)-1,2-cyclohexanediamine (1.00 g, 8.71 mmol) was dissolved in anhydrous CH<sub>2</sub>Cl<sub>2</sub> (20 mL). A CH<sub>2</sub>Cl<sub>2</sub> solution of isothiocyanate **11** (5 mL, 1.2 M) was added dropwise to this solution *via* syringe over 5 minutes. Additional (3 x 2 mL) portions of CH<sub>2</sub>Cl<sub>2</sub> were used to effect quantitative transfer of **11**. The solution is maintained at room temperature for 3 h, and poured into water (10 mL). The layers are separated and the organic layer dried (Na<sub>2</sub>SO<sub>4</sub>), concentrated *in vacuo*, and the resulting residue purified by silica gel chromatography (10:1 CH<sub>2</sub>Cl<sub>2</sub>:MeOH–10:1:0.1 CH<sub>2</sub>Cl<sub>2</sub>:MeOH:NH<sub>4</sub>OH) to yield 1.83 g (70 % from **8**) of **12** as a tan foam. <sup>1</sup>H NMR (500 MHz, CDCl<sub>3</sub>, 1:1.6 mix of rotamers) 7.42–7.30 (m, 18H); 7.26–7.20 (m, 4.8H); 7.13–7.08 (m, 2.6H); 6.61 (br s, 1.6H); 6.60 (br s, 1H); 6.01 (d, *J* = 6.5 Hz, 1H); 5.49 (dd, *J* = 9.0, 5.5 Hz, 1.6H); 5.19 (d, *J* = 7.0 Hz, 1.6); 5.19–5.16 (m, 1H); 4.13 (br s, 1.6H); 3.83–3.78 (m, 2.6H); 3.28 (d, *J* = 5.5 Hz, 1H); 3.25 (d, *J* = 5.5 Hz, 1H); 3.16 (dd, *J* = 12.5, 10.0 Hz, 1.6H); 2.72 (dd, *J* = 14.5, 10.0 Hz, 1H); 2.68–2.60 (m, 1.6H); 2.59–2.42 (m, 2.6H); 2.20–19.0 (m, 18H); 1.89–1.59 (18H); 1.58–1.46 (m, 1.6H); 1.32–1.20 (m, 3.2 H); 1.20–1.02 (m, 4H); <sup>13</sup>C NMR (125 MHz; CDCl<sub>3</sub>, mixture of rotamers) δ 182.8, 182.5, 143.8, 142.2, 136.6, 136.0, 129.5, 129.1, 128.9, 128.5, 128.3, 128.0, 127.4, 127.2, 126.8, 126.3, 126.0, 125.4, 61.9, 61.0, 57.5 (br), 47.6, 46.9, 39.3 (br), 38.0 (br), 36.1, 34.8 (br), 34.2 (br), 33.9, 32.0, 24.8, 24.69, 24.67 (br), 22.1 (br), 21.8; IR (film) 3308, 3062, 2929, 2855, 1626, 1543, 1449 cm<sup>-1</sup>; HRMS (ESI) calcd for C<sub>26</sub>H<sub>35</sub>N<sub>4</sub>OS (M+H) *m/z* 451.2526; found 451.2548.

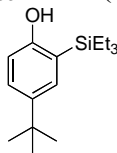

**4-tert-butyl-2-(triethylsilyl)phenol (13).** To a flask charged with 2-bromo-4-*tert*-butylphenol (4.36 g, 19.03 mmol) was added imidazole (1.94 g, 28.54 mmol); 4-dimethylaminopyridine (0.23 g, 1.90 mmol) followed by chlorotriethylsilane (3.8 mL, 22.80 mmol). The heterogeneous mixture was stirred vigorously for 3 h at rt, then diluted with Et<sub>2</sub>O (50 mL) and the mixture partitioned between Et<sub>2</sub>O (100 mL) and sat. aq. NH<sub>4</sub>Cl (100 mL). The layers were separated and the aqueous layer was extracted with Et<sub>2</sub>O (2x100 mL). The combined organic fractions were washed with brine (100 mL), dried (MgSO<sub>4</sub>)

and concentrated *in vacuo* to provide a colorless oil which was of sufficient purity for the following step.

To a flame-dried flask under N<sub>2</sub> charged with the silyl-protected phenol (generated in the previous step ~19 mmol), was added THF (200 mL) and resulting solution was cooled to -78 °C. A hexanes solution of *n*-BuLi (9.8 mL, 24.4 mmol, 2.5 M) was added via syringe over 5 minutes. The solution was maintained at -78 °C for 1 h and then quenched by pouring into saturated aqueous NH<sub>4</sub>Cl. The resulting mixture was partitioned between Et<sub>2</sub>O (100 mL) and sat. aq. NH<sub>4</sub>Cl (100 mL). The layers were separated and the aqueous layer was extracted with Et<sub>2</sub>O (2x100 mL). The combined organic fractions were washed with brine (100 mL), dried (Na<sub>2</sub>SO<sub>4</sub>) and concentrated *in vacuo*. The resulting residue was purified *via* silica gel chromatography (10:1 hexanes:EtOAc) to yield 5.02 g (99% yield) of **13** as a colorless oil: <sup>1</sup>H NMR (500 MHz, CDCl<sub>3</sub>) 7.36 (d, *J* = 3.0 Hz, 1H); 7.23 (dd, *J* = 8.0, 2.0 Hz, 1H); 6.61 (d, *J* = 9.0 Hz, 1H); 1.30 (s, 9H); 0.98 (t, *J* = 8.0 Hz, 9H); 0.86 (q, *J* = 8.0 Hz, 6H); <sup>13</sup>C NMR (125 MHz, CDCl<sub>3</sub>) δ 158.2, 142.5, 133.0, 127.3, 121.5, 113.9, 34.0, 31.6, 7.57, 3.64; IR (film) 3539, 2875, 1593, 1488, 1386, 1264, 1071, 733 cm<sup>-1</sup>; ; HRMS (CI) calcd for C<sub>16</sub>H<sub>32</sub>NOSi (M+NH<sub>4</sub>) *m/z* 282.2253; found 282.2239.

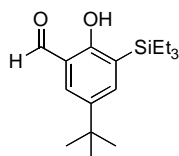

**5-tert-butyl-2-hydroxy-3-(triethylsilyl)benzaldehyde (14).**<sup>1</sup> A 3-neck, 500 mL flask with an attached condenser was charged with **13** (5.02 g, 19.0 mmol); paraformaldehyde (1.44 g, 48.0 mmol) and MgCl<sub>2</sub> (3.65 g, 38.4 mmol). THF (200 mL) was added, followed by Et<sub>3</sub>N (5.35 mL, 38.4 mmol). The resulting yellow slurry was heated at reflux for 20 h. The mixture was then cooled to rt, and 10% HCl (aqueous, 200 mL) was added, followed by Et<sub>2</sub>O (200 mL). The layers were separated and the remaining organic layer was washed with an additional portion of 10% aqueous HCl (100 mL), then washed with sat. aqueous NaHCO<sub>3</sub> (3x100 mL), brine (100 mL), dried (Na<sub>2</sub>SO<sub>4</sub>) and concentrated *in vacuo*. The residue was purified on silica gel (10:1 hexanes:EtOAc) to yield 4.57 g (86% yield) of **14** as a colorless oil. <sup>1</sup>H NMR (500 MHz, CDCl<sub>3</sub>) 11.17 (s, 1H); 9.87 (s, 1H); 7.65 (d, *J* = 2.5 Hz, 1H); 7.48 (d, *J* = 2.5 Hz, 1H); 1.33 (s, 9H); 0.97 (t, *J* = 8.0 Hz, 9H); 0.88 (q, *J* = 8.0 Hz, 6H); <sup>13</sup>C NMR (125 MHz, CDCl<sub>3</sub>) δ 197.3, 164.8, 142.1, 141.6, 131.1, 125.6, 119.1, 34.3, 31.5, 7.72, 3.53; IR (film) 2955, 2875, 2833, 2732, 1658, 1606, 1583, 1401, 1262, 1006, 869 cm<sup>-1</sup>; HRMS (ESI) calcd for C<sub>17</sub>H<sub>28</sub>O<sub>2</sub>Si (M+H) *m/z* 293.1931; found 293.1938.

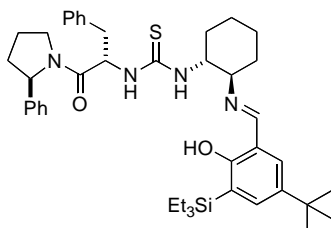

**1-((1R,2R)-2-((E)-5-tert-butyl-2-hydroxy-3-(triethylsilyl)benzylideneamino)cyclohexyl)-3-((S)-1-oxo-3-phenyl-1-((R)-2-phenylpyrrolidin-1-yl)propan-2-yl)thiourea (5).** A flame-dried 100 mL flask was charged with **12** (0.98 g, 2.18 mmol), aldehyde **14** (0.64 g, 2.18 mmol), and freshly flame-dried Na<sub>2</sub>SO<sub>4</sub> (2.0 g, 14.2 mmol). The flask was sealed with a rubber septum, placed under N<sub>2</sub>, and CH<sub>2</sub>Cl<sub>2</sub> (10 mL) was added. The mixture was stirred at rt for 18 h, concentrated *in vacuo* and purified with a

<sup>1</sup> Procedure adapted from T. V. Hansen, L. Skattebøl, *Tetrahedron Lett.* **2005**, *46*, 3829–3830.

PLUG of activity III basic alumina<sup>2</sup> (3:1 hexanes:EtOAc) to yield 1.47 g (93% yield) of **5** as a yellow crystalline solid.<sup>3</sup> <sup>1</sup>H NMR (500 MHz, CDCl<sub>3</sub>, mixture of rotamers only diagnostic peaks reported) 12.90 (br s, 1H); 12.72 (br s, 1H); 8.27 (br s, 1H); 8.21 (br s, 0.6 H); 7.44–7.40 (m, 1.6H); 7.35–7.09 (m, 18H); 7.03–6.92 (m, 1.6H); 6.52 (d, *J* = 6.0 Hz, 1H); 6.00 (br s, 0.6H); 5.57 (br s, 0.6H); 5.34 (br s, 1H); 5.03 (d, *J* = 6.0 Hz, 1H); 3.80–3.60 (m, 3H); 2.95–2.80 (m, 3H); 2.58–2.50 (m, 1H); 2.40–2.30 (m, 1H); 2.30–2.24 (m, 0.6H); 1.85–1.50 (m, 12.6H); 1.40–1.10 (m, 14H), 1.30 (s, H); 1.00–0.72 (m, 30H); <sup>13</sup>C NMR (125 MHz, CDCl<sub>3</sub>, mixture of rotamers, only prominent peaks reported) δ 197.1, 165.6, 164.6, 164.0, 163.7, 143.4, 141.3, 140.2, 140.1, 136.4, 136.1, 130.9, 129.6, 129.5, 129.3, 128.9, 128.3, 128.2, 127.9, 127.3, 126.8, 126.6, 126.2, 125.9, 125.5, 123.7, 118.9, 117.0, 61.8, 60.9, 47.4, 46.9, 39.2, 35.9, 33.9, 31.6, 31.4, 31.3, 22.4, 21.77.64, 7.59, 7.46, 3.4, 3.3; IR (film) 3269, 2953, 2873, 1629, 1449, 1263, 733 cm<sup>-1</sup>; LRMS (ESI) calcd for C<sub>43</sub>H<sub>60</sub>N<sub>4</sub>O<sub>2</sub>SSi (M+H) *m/z* 725.4; found 725.9.

### C. Preparation of *N*-acyliminium ion precursors

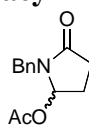

**1-benzyl-5-oxopyrrolidin-2-yl acetate (6a).** To a flame-dried 50 mL round bottom was added 1-benzyl-5-hydroxypyrrolidin-2-one (**1**)<sup>4</sup> (1.03 g, 5.37 mmol), 4-(dimethylamino)pyridine (0.06 g, 0.54 mmol) and a stir bar. The flask was sealed with a rubber septum and placed under N<sub>2</sub> atmosphere. CH<sub>2</sub>Cl<sub>2</sub> (20 mL) was added followed by Et<sub>3</sub>N (0.97 mL, 6.98 mmol) and acetic anhydride (0.56 mL, 5.90 mmol). The solution was maintained at rt for 1 h, at which time it was concentrated *in vacuo* and purified through a short column of activity III alumina to yield 1.24 g (99% yield) of **6a** as a colorless oil. This oil was unstable neat at rt, but could be stored indefinitely as a solution in TBME at –30 °C (solution was stable at rt for several hours, which was long enough for set up of addition reactions). <sup>1</sup>H NMR (500 MHz, CDCl<sub>3</sub>) 7.34–7.29 (m, 2H); 7.23–7.28 (m, 3H); 6.13 (d, *J* = 6.0 Hz, 1H); 4.72 (d, *J* = 15.0 Hz, 1H); 4.20 (d, *J* = 15.5 Hz, 1H); 2.64 (ddd, *J* = 18.0, 10.0, 10.0 Hz, 1H); 2.41 (ddd, *J* = 17.0, 10.0, 2.0 Hz, 1H); 2.32–2.22 (m, 1H); 2.02–1.98 (m, 1H); 1.91 (s, 3H); <sup>13</sup>C NMR (125 MHz, CDCl<sub>3</sub>) δ 175.5, 170.5, 136.3, 128.6, 128.3, 127.7, 84.2, 44.6, 28.3, 26.0, 20.9; IR (film) 2933, 1742, 1716, 1444, 1419, 1237, 1173 cm<sup>-1</sup>; HRMS (ESI) calcd for C<sub>13</sub>H<sub>16</sub>NO<sub>3</sub> (M+H) *m/z* 234.1125; found 234.1121.

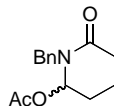

**1-benzyl-6-oxopiperidin-2-yl acetate (6b).** The product was prepared from 1-benzyl-6-hydroxypiperidin-2-one on 5.74 mmol scale in a similar manner to that described for the preparation of **6a**. This procedure yielded 1.41 g (99% yield) of **6b** as a colorless oil. <sup>1</sup>H NMR (500 MHz, CDCl<sub>3</sub>) 7.32–7.28 (m, 2H); 7.27–7.22 (m, 3H); 6.10–6.06 (m, 1H); 4.97 (d, *J* = 15.0 Hz, 1H); 4.19 (d, *J* = 15.0 Hz, 1H); 2.68–2.59 (m, 1H); 2.49–2.40 (m, 1H); 2.11–2.00 (m, 1H); 2.00–1.94 (m, 1H); 1.92 (s, 3H); 1.86–1.76 (m, 2H); <sup>13</sup>C NMR (125 MHz, CDCl<sub>3</sub>) δ 170.5, 170.2, 137.1, 128.5, 128.2, 127.4, 80.6,

<sup>2</sup> Activity III basic alumina is prepared by the addition of 6% by weight water to Brockman Alumina Activity I.

<sup>3</sup> It is possible to observe small amounts of aldehyde **14** in the final <sup>1</sup>H NMR of the catalyst **5**. These result from both minor hydrolysis of the final catalyst in the <sup>1</sup>H NMR solvent, and/or from measurement error in conducting the final experiment in the catalyst synthesis. This contaminant does not have any deleterious effect on the catalytic reaction.

<sup>4</sup> J. C. Hubert, J. B. P. A. Wunberg, W. N. Speckamp, *Tetrahedron* **1975**, *31*, 1437–1441.

48.1, 32.2, 28.3, 20.9, 16.2; IR (film) 2957, 1736, 1664, 1452, 1234, 1180, 962  $\text{cm}^{-1}$ ; HRMS (ESI) calcd for  $\text{C}_{14}\text{H}_{17}\text{NO}_3$  (M+H)  $m/z$  248.1281; found 248.1282.

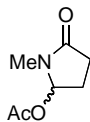

**1-methyl-5-oxopyrrolidin-2-yl acetate (6c).** The product was prepared from 5-hydroxy-1-methylpyrrolidin-2-one (0.60 g, 5.2 mmol) as described for **6a**. The product **6c** was extremely unstable but could be quickly purified on activity III alumina (8:2:0.5  $\text{CH}_2\text{Cl}_2$ :EtOAc:Et<sub>3</sub>N). The product **6c** could not be detected by thin layer silica gel chromatography, as it decomposed on the plate. It was imperative to use **6c** immediately upon production as prolonged storage resulted in decomposition. The product was consistent with previously reported data.<sup>5</sup>

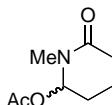

**1-methyl-6-oxopiperidin-2-yl acetate (6d).** The product was prepared from 6-hydroxy-1-methylpiperidin-2-one on 2.76 mmol scale in a similar manner to that described for the preparation of **6a**. This procedure yielded 0.11 g (23% yield) of **6d** as a colorless oil. The product **6d** decomposed during thin layer chromatography. It was imperative to use **6d** immediately upon production as prolonged storage resulted in decomposition. <sup>1</sup>H NMR (500 MHz,  $\text{CDCl}_3$ ) 6.07–6.05 (m, 1H); 2.92 (s, 3H); 2.58–2.49 (m, 1H); 2.39–2.31 (m, 1H); 2.08 (s, 3H); 2.02–1.91 (m, 3H); 1.80–1.74 (m, 1H); <sup>13</sup>C NMR (125 MHz,  $\text{CDCl}_3$ )  $\delta$  171.5, 170.7, 83.2, 33.4, 32.3, 28.4, 21.3, 16.7; IR (film) 2956, 1735, 1664, 1399, 1374, 1228, 1050, 982  $\text{cm}^{-1}$ .

#### D. General Procedure for the synthesis of racemic 5-(1*H*-indol-3-yl)pyrrolidin-2-ones

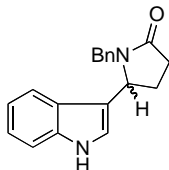

A 1-dram glass vial was charged with indole (9 mg, 0.08 mmol), 1,3-bis(3,5-bis(trifluoromethyl)phenyl)thiourea<sup>6</sup> (3 mg, 8  $\mu\text{mol}$ ), and hydroxy-lactam **1** (15 mg, 0.08 mmol). The vial is sealed with a teflon cap and  $\text{CH}_2\text{Cl}_2$  (0.4 mL) is added and the solution cooled to  $-78$  °C. A  $\text{CH}_2\text{Cl}_2$  solution of TMSCl (0.10 mL, 0.15 mmol, 1.6 M) is added and the solution is allowed to warm to 0 °C and maintained at this temperature for 18 h. Saturated aqueous  $\text{NaHCO}_3$  (0.2 mL) is added and the layers separated. The organic layer is loaded directly onto a silica gel column (8:2  $\text{CH}_2\text{Cl}_2$ :EtOAc) and purified to give 18 mg (80 % yield) of racemic product **2a**. See enantioenriched procedure for spectral data.

#### E. General Procedures for the preparation of enantioenriched 5-(indol-3-yl)pyrrolidin-2-ones (2).

**Method A.** A 10 mL, flame-dried round bottom flask was charged with indole (0.040 g, 0.343 mmol), catalyst **5** (0.012 g, 0.017 mmol) and sealed with a rubber septum. The flask was flushed with  $\text{N}_2$  and anhydrous TBME (1.6 mL) was added. The resulting yellow solution was cooled to  $-78$  °C, and a

<sup>5</sup> Y. Nagao, W.-M. Dai, M. Ochiai, M. Shiro, *Tetrahedron* **1990**, *46*, 6361–6380.

<sup>6</sup> Achiral thiourea catalyst: M. Kotke, P. R. Schreiner, *Tetrahedron* **2006**, *62*, 434–439.

TBME solution of acetoxy-lactam **6** (0.65 mL, 0.34 mmol, 0.53 M) was added. Next, TBME solutions of TMSCl (0.43 mL, 0.69 mmol, 1.6 M) and H<sub>2</sub>O<sup>7</sup> (0.20 mL, 0.03 mmol, 0.14 M) were added sequentially and the solution was warmed to -30 °C and stirred for 24 h. Next, the heterogeneous solution is quenched by the addition of an EtOH solution of NaOEt (0.2 mL, 21 wt%), followed by immediate addition of water (1 mL). The mixture is allowed to warm to rt and is diluted with EtOAc until all solid dissolves (amount depends on particular product ~5–10 mL). The layers are separated and the organic layer is dried (Na<sub>2</sub>SO<sub>4</sub>) and concentrated *in vacuo*. See individual products for purification procedures.

**Method B.** A 10 mL, flame-dried round bottom flask was charged with indole (0.040 g, 0.343 mmol), catalyst **5** (0.012 g, 0.017 mmol) and sealed with a rubber septum. The flask was flushed with N<sub>2</sub> and anhydrous TBME (1.6 mL) was added. The resulting yellow solution was cooled to -78 °C, and a TBME solution of acetoxy-lactam **6** (0.65 mL, 0.34 mmol, 0.53 M) was added. Next, a TBME solution of BCl<sub>3</sub> (created by adding 0.2 mL of 1.0 M BCl<sub>3</sub> in hexanes into 5 mL of TBME) (0.86 mL, 0.034 mmol, 0.04 M) was added and the solution was warmed to -30 °C and stirred for 48–96 h. Next, the heterogeneous solution is quenched by the addition of an EtOH solution of NaOEt (0.2 mL, 21 wt%), followed by immediate addition of water (1 mL). The mixture is allowed to warm to rt and is diluted with EtOAc until all solid dissolves (amount depends on particular product ~5–10 mL). The layers are separated and the organic layer is dried (Na<sub>2</sub>SO<sub>4</sub>) and concentrated *in vacuo*.

**A note on purification by the trituration procedure:** We have observed that trituration from Et<sub>2</sub>O leads to further enantiomeric enrichment. The product remaining in the mother-liquor is consequently enriched in minor diastereomer. We hypothesize that the catalyst interacts selectively with the minor enantiomer, further stabilizing it in solution. Independent experiments were conducted where alumina-purified product **2a** (93% ee) was subjected to 10 mol% catalyst, trituated from Et<sub>2</sub>O (3x5 mL) and the remaining product was analyzed to be 98% ee.

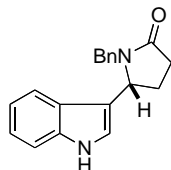

**(R)-1-benzyl-5-(1H-indol-3-yl)pyrrolidin-2-one (2a).** The product was prepared by Method A and was scaled to 3.15 mmol. The crude product (93% ee) was purified by trituration from Et<sub>2</sub>O (3x10 mL) to yield **2a** (0.854 g, 90% yield) as a colorless crystalline solid. This material was determined to be 99% ee by chiral SFC analysis (ChiralPak AS-H, 4.0 mL/min, 220 nm, 20% MeOH, t<sub>r</sub>(minor) = 3.79 min, t<sub>r</sub>(major) = 5.80 min. [α]<sub>D</sub><sup>29</sup> = -49° (c = 1.3 g/100mL, MeOH); <sup>1</sup>H NMR (500 MHz, d<sub>6</sub>-DMSO) 11.12 (s, 1H); 7.42 (d, J = 8.5 Hz, 1H); 7.37 (d, J = 7.5 Hz, 1H); 7.32–7.26 (m, 4H), 7.14 (dd, J = 7.5, 1.0 Hz, 1H); 7.08 (d, J = 7.0 Hz, 2H); 7.00 (dd, J = 8.0, 1.0 Hz, 1H); 4.83–4.78 (m, 2H); 3.51 (d, J = 15 Hz, 1H); 2.60–2.48 (m, 2H, DMSO overlaps); 2.46–2.38 (m, 1H); 2.17–2.08 (m, 1H); <sup>13</sup>C NMR (125 MHz, d<sub>6</sub>-DMSO) δ 173.9, 137.1, 136.9, 128.3, 127.5, 127.0, 125.1, 124.2, 121.3, 118.9, 118.2, 113.4, 111.9, 54.2, 43.2, 30.1, 26.5; IR (film) 3225, 2925, 1660, 1444, 1264 cm<sup>-1</sup>; HRMS (ESI) calcd for C<sub>19</sub>H<sub>19</sub>N<sub>2</sub>O (M+H) m/z 291.1497; found 291.1498.

<sup>7</sup> The solubility of water in TBME is 1.5 g in 100 mL. *The Merck Index*, 12<sup>th</sup> Edition (Eds: S. Budavari et al), MERCK & Co, Whitehouse Station, NJ, **1996**, p 1032.

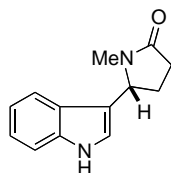

**(R)-5-(1*H*-indol-3-yl)-1-methylpyrrolidin-2-one (2b).** The product was prepared by Method A on 0.21 mmol scale. Note that acetoxy-lactam **6c** is extremely unstable and must be used immediately upon isolation.<sup>8</sup> The crude product (85% ee) was purified by trituration from 1:1 Et<sub>2</sub>O:hexanes (1x10 mL) to yield **2b** (0.042 g, 93% yield) as a colorless crystalline solid. This material was determined to be 86% ee by chiral SFC analysis (ChiralPak AD-H, 4.0 mL/min, 220 nm, 20% MeOH, *t*<sub>r</sub>(minor) = 6.71 min, *t*<sub>r</sub>(major) = 7.23 min. [ $\alpha$ ]<sub>D</sub><sup>29</sup> = -21° (*c* = 0.8 g/100mL, MeOH); <sup>1</sup>H NMR (500 MHz, CDCl<sub>3</sub>) 8.28 (br s, 1H); 7.54 (dd, *J* = 8.0, 1.0 Hz, 1H); 7.41 (ddd, *J* = 8.5, 1.0, 1.0 Hz, 1H); 7.26 (s, 1H); 7.23 (dd, *J* = 7.0, 7.0, 1.0, 1H); 7.15–7.11 (m, 2H); 4.87 (t, *J* = 8.0 Hz, 1H); 2.71 (s, 3H); 2.68–2.60 (m, 1H); 2.56–2.42 (m, 2H); 2.24–2.16 (m, 1H); <sup>13</sup>C NMR (125 MHz, CDCl<sub>3</sub>)  $\delta$  175.2, 136.9, 125.2, 122.6, 122.5, 119.9, 118.8, 115.1, 111.7, 57.9, 30.7, 28.0, 26.9; IR (film) 3259, 2927, 1659, 1457, 1267, 1109, 744 cm<sup>-1</sup>; HRMS (ESI) calcd for C<sub>13</sub>H<sub>15</sub>N<sub>2</sub>O (M+H) *m/z* 215.1179; found 215.1185.

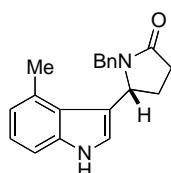

**(R)-1-benzyl-5-(4-methyl-1*H*-indol-3-yl)pyrrolidin-2-one (2c).** The product was prepared by Method A on 0.34 mmol scale. The crude product was purified on activity III basic alumina (8:2 CH<sub>2</sub>Cl<sub>2</sub>:EtOAc) to yield **2c** (0.090 g, 86% yield) as a colorless crystalline solid. This material was determined to be 95% ee by chiral SFC analysis (Pirkle S,S-Whelk, 4.0 mL/min, 220 nm, 15% MeOH, *t*<sub>r</sub>(minor) = 6.68 min, *t*<sub>r</sub>(major) = 8.36 min. [ $\alpha$ ]<sub>D</sub><sup>28</sup> = -6° (*c* = 0.9 g/100mL, MeOH); <sup>1</sup>H NMR (500 MHz, CDCl<sub>3</sub>) 8.75 (br s, 1H); 7.37–7.29 (m, 4H); 7.19 (d, *J* = 5.0 Hz, 2H); 7.15 (dd, *J* = 7.5, 7.5 Hz, 1H); 7.00 (d, *J* = 2.5 Hz, 1H); 6.88 (d, *J* = 6.5 Hz, 1H); 5.25 (d, *J* = 15.0 Hz, 1H); 5.21 (d, *J* = 6.0 Hz, 1H); 3.92 (d, *J* = 14.5 Hz, 1H); 2.70–2.60 (m, 1H); 2.52–2.43 (m, 2H); 2.47 (s, 3H); 2.08–2.00 (m, 1H); <sup>13</sup>C NMR (125 MHz, CDCl<sub>3</sub>)  $\delta$  175.7, 137.4, 137.0, 130.3, 128.9, 128.6, 127.8, 125.0, 122.7, 121.7, 121.0, 117.2, 109.7, 55.2, 44.8, 29.6, 29.3, 20.9; IR (film) 3281, 2943, 1666, 1441, 1417, 750 cm<sup>-1</sup>; LRMS (ESI) calcd for C<sub>20</sub>H<sub>21</sub>N<sub>2</sub>O (M+H) *m/z* 305.2; found 305.4.

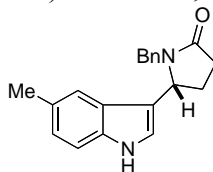

**(R)-1-benzyl-5-(5-methyl-1*H*-indol-3-yl)pyrrolidin-2-one (2d).** The product was prepared by Method A on 0.34 mmol scale. The crude product was purified by trituration from Et<sub>2</sub>O (3x2 mL) to yield **2d** (0.082 g, 79% yield) as a colorless crystalline solid. This material was determined to be 91% ee by chiral SFC analysis (ChiralPak AS-H, 4.0 mL/min, 220 nm, 20% MeOH, *t*<sub>r</sub>(minor) = 3.48 min, *t*<sub>r</sub>(major) = 5.01 min. [ $\alpha$ ]<sub>D</sub><sup>29</sup> = -74° (*c* = 0.4 g/100mL, MeOH); <sup>1</sup>H NMR (500 MHz, *d*<sub>6</sub>-DMSO) 10.98

<sup>8</sup> Use of a mixture of hydroxylactam and acetoxy-lactam (resulting from hydrolysis of **6c**) gave diminished yield and ee (80% yield, 78% ee).



(s, 1H); 7.30–7.26 (m, 3H); 7.24 (d,  $J = 7.0$  Hz, 1H); 7.19 (d,  $J = 2.5$  Hz, 1H); 7.09 (br s, 1H); 7.05 (d,  $J = 6.5$  Hz, 2H); 6.93 (dd,  $J = 8.5, 1.5$  Hz, 1H); 4.78 (d,  $J = 15$  Hz, 1H); 4.76 (t, 7.0 Hz, 1H); 3.48 (d,  $J = 15$  Hz, 1H); 2.60–2.42 (m, 2H); 2.40–2.31 (m, 1H); 2.34 (s, 3H); 2.13–2.07 (m, 1H);  $^{13}\text{C}$  NMR (125 MHz,  $d_6$ -DMSO)  $\delta$  173.9, 137.1, 135.2, 128.3, 127.5, 127.3, 126.9, 125.4, 124.3, 123.0, 117.8, 112.8, 111.6, 54.2, 43.2, 30.2, 26.4, 21.3; IR (film) 3215, 2921, 1661, 1435  $\text{cm}^{-1}$ ; LRMS (ESI) calcd for  $\text{C}_{20}\text{H}_{21}\text{N}_2\text{O}$  (M+H)  $m/z$  305.2; found 305.4.

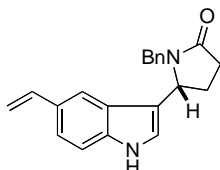

**(R)-1-benzyl-5-(5-vinyl-1H-indol-3-yl)pyrrolidin-2-one (2e).** The product was prepared by Method A on 0.34 mmol scale. The crude product was purified on activity III basic alumina (8:2  $\text{CH}_2\text{Cl}_2$ :EtOAc) to yield **2e** (0.090 g, 86% yield) as a colorless crystalline solid. This material was determined to be 90% ee by chiral SFC analysis (ChiralPak AS-H, 4.0 mL/min, 220 nm, 20% MeOH,  $t_r$ (minor) = 3.72 min,  $t_r$ (major) = 4.99 min.  $[\alpha]_D^{28} = -71^\circ$  ( $c = 1.1$  g/100mL, MeOH);  $^1\text{H}$  NMR (500 MHz,  $\text{CDCl}_3$ ) 8.43 (br s, 1H); 7.41–7.35 (m, 3H); 7.28–7.23 (m, 3H); 7.10 (dd,  $J = 8.0, 2.5$  Hz, 2H); 7.00 (d,  $J = 2.0$  Hz, 1H); 6.79 (dd,  $J = 17.5, 10.5$  Hz, 1H); 5.67 (d,  $J = 17.5$  Hz, 1H); 5.17 (d,  $J = 11.0$  Hz, 1H); 5.09 (d,  $J = 15.0$  Hz, 1H); 4.78 (dd,  $J = 8.0, 6.5$  Hz, 1H); 3.60 (d,  $J = 14.5$  Hz, 1H); 2.75–2.69 (m, 1H); 2.58 (ddd,  $J = 17.5, 9.5, 7.5$  Hz, 1H); 2.43–2.37 (m, 1H); 2.26–2.18 (m, 1H);  $^{13}\text{C}$  NMR (125 MHz)  $\delta$  175.0, 137.5, 136.8, 136.7, 130.0, 128.43, 128.36, 127.3, 125.6, 123.3, 120.6, 117.4, 115.3, 111.7, 111.6, 54.6, 44.2, 30.8, 26.8; IR (film) 3276, 3031, 2925, 1669, 1441, 1411, 1264, 1161  $\text{cm}^{-1}$ ; HRMS (ESI) calcd for  $\text{C}_{21}\text{H}_{21}\text{N}_2\text{O}$  (M+H)  $m/z$  317.1654; found 317.1653.

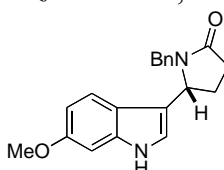

**(R)-1-benzyl-5-(6-methoxy-1H-indol-3-yl)pyrrolidin-2-one (2f).** The product was prepared by Method A on 0.34 mmol scale. The crude product (80% ee) was purified by trituration from 9:1  $\text{Et}_2\text{O}$ : $\text{CH}_2\text{Cl}_2$  (3x2 mL) to yield **2f** (0.087 g, 80% yield) as a colorless crystalline solid. This material was determined to be 98% ee by chiral SFC analysis (ChiralPak AS-H, 4.0 mL/min, 220 nm, 20% MeOH,  $t_r$ (minor) = 4.19 min,  $t_r$ (major) = 6.16 min.  $[\alpha]_D^{29} = -69^\circ$  ( $c = 0.5$  g/100mL, MeOH);  $^1\text{H}$  NMR (500 MHz,  $d_6$ -DMSO) 10.91 (br s, 1H); 7.34–7.30 (m, 2H); 7.27 (d,  $J = 7.5$  Hz, 1H); 7.24 (d,  $J = 8.5$  Hz, 1H); 7.14 (d,  $J = 2.5$  Hz, 1H); 7.09 (d,  $J = 7.0$  Hz, 2H); 6.93 (d,  $J = 2.0$  Hz, 1H); 6.68 (dd,  $J = 9.0, 2.5$  Hz, 1H); 4.80 (d,  $J = 15.5$  Hz, 1H); 4.77 (t,  $J = 7.5$  Hz, 1H);<sup>9</sup> 3.80 (s, 3H); 3.52 (d,  $J = 15.0$  Hz, 1H); 2.60–2.38 (m, 2H); 2.44–2.36 (m, 1H); 2.15–2.06 (m, 1H);  $^{13}\text{C}$  NMR (125 MHz,  $d_6$ -DMSO)  $\delta$  173.9, 155.7, 137.7, 137.1, 128.4, 127.5, 127.0, 122.9, 119.3, 118.8, 113.4, 109.2, 94.9, 55.1, 54.3, 43.2, 30.1, 26.5; IR (film) 3280, 2950, 1682, 1454, 1294, 1159, 702  $\text{cm}^{-1}$ ; HRMS (ESI) calcd for  $\text{C}_{20}\text{H}_{21}\text{N}_2\text{O}_2$  (M+H)  $m/z$  321.1603; found 321.1595.

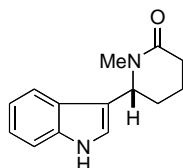

<sup>9</sup> Part of peak overlapping with another resonance.

**(R)-6-(1H-indol-3-yl)-1-methylpiperidin-2-one (2g).** The product was prepared by Method A on 0.29 mmol scale. The crude product was purified on activity III basic alumina (8:2 CH<sub>2</sub>Cl<sub>2</sub>:EtOAc) to yield **2g** (0.040 g, 60% yield) as a colorless crystalline solid. This material was determined to be 92% ee by chiral SFC analysis (ChiralPak AD-H, 4.0 mL/min, 220 nm, 20% MeOH, *t<sub>r</sub>*(minor) = 3.29 min, *t<sub>r</sub>*(major) = 3.89 min.  $[\alpha]_D^{28} = +4^\circ$  (*c* = 0.7 g/100mL, MeOH); <sup>1</sup>H NMR (500 MHz, CDCl<sub>3</sub>) 8.34 (br s, 1H); 7.54 (d, *J* = 7.5 Hz, 1H); 7.41 (d, *J* = 8.0 Hz, 1H); 7.26 (s, 1H); 7.23 (ddd, *J* = 8.5, 8.5, 1.5 Hz, 1H); 7.14 (dd, *J* = 7.5, 7.5 Hz, 1H); 7.00 (d, *J* = 3.0 Hz, 1H); 4.89 (t, *J* = 5.0 Hz, 1H); 2.93 (s, 3H); 2.59–2.45 (m, 2H); 2.20–2.09 (m, 2H); 1.87–1.76 (m, 1H); 1.74–1.64 (m, 1H); <sup>13</sup>C NMR (125 MHz, CDCl<sub>3</sub>) δ 170.8, 136.8, 125.4, 122.4, 122.2, 119.8, 118.5, 116.3, 111.6, 57.0, 34.0, 32.3, 30.2, 18.1; IR (film) 3257, 2947, 1614, 1397, 1246, 742 cm<sup>-1</sup>; HRMS (ESI) calcd for C<sub>14</sub>H<sub>17</sub>N<sub>2</sub>O (M+H) *m/z* 229.1335; found 229.1335.

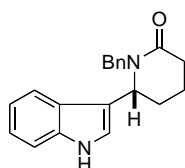

**(R)-1-benzyl-6-(1H-indol-3-yl)piperidin-2-one (2h).** The product was prepared by Method A on 0.34 mmol scale. The crude product was purified on activity III basic alumina (8:2 CH<sub>2</sub>Cl<sub>2</sub>:EtOAc) to yield **2h** (0.073 g, 70% yield) as a colorless crystalline solid. This material was determined to be 93% ee by chiral SFC analysis (ChiralPak AS-H, 4.0 mL/min, 220 nm, 20% MeOH, *t<sub>r</sub>*(minor) = 3.75 min, *t<sub>r</sub>*(major) = 5.36 min.  $[\alpha]_D^{29} = -54^\circ$  (*c* = 0.9 g/100mL, MeOH); <sup>1</sup>H NMR (500 MHz, CDCl<sub>3</sub>) 8.54 (br s, 1H); 7.48 (d, *J* = 7.5 Hz, 1H); 7.42 (d, *J* = 8.0 Hz, 1H); 7.32–7.21 (m, 4H); 7.18 (d, *J* = 8.5 Hz, 2H); 7.13 (dd, *J* = 8.0, 1.0 Hz, 1H); 7.00 (d, *J* = 2.0 Hz, 1H); 5.63 (d, *J* = 15.0 Hz, 1H); 4.87 (t, *J* = 5.5 Hz, 1H); 3.65 (d, *J* = 15.0 Hz, 1H); 2.70–2.55 (m, 2H); 2.15–2.10 (m, 1H); 2.09–1.98 (m, 1H); 1.90–1.80 (m, 1H); 1.75–1.66 (m, 1H); <sup>13</sup>C NMR (125 MHz, CDCl<sub>3</sub>) δ 171.0, 138.0, 137.1, 128.7, 128.2, 127.4, 125.8, 122.7, 122.7, 120.0, 118.9, 116.3, 111.8, 53.7, 47.9, 32.6, 30.4, 18.0; IR (film) 3234, 2949, 1620, 1453, 1414, 732 cm<sup>-1</sup>; HRMS (ESI) calcd for C<sub>20</sub>H<sub>21</sub>N<sub>2</sub>O (M+H) *m/z* 305.1654; found 305.1644.

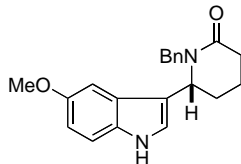

**(R)-1-benzyl-6-(5-methoxy-1H-indol-3-yl)piperidin-2-one (2i).** The product was prepared by Method A on 0.34 mmol scale. The crude product (crude ee = 91%)<sup>10</sup> was purified on activity III basic alumina (8:2 CH<sub>2</sub>Cl<sub>2</sub>:EtOAc) to yield **2i** (0.099 g, 86% yield) as a colorless crystalline solid. This material was determined to be 90% ee by chiral SFC analysis (ChiralPak AS-H, 4.0 mL/min, 220 nm, 20% MeOH, *t<sub>r</sub>*(minor) = 3.47 min, *t<sub>r</sub>*(major) = 4.85 min.  $[\alpha]_D^{29} = -56^\circ$  (*c* = 0.6 g/100mL, MeOH); <sup>1</sup>H NMR (500 MHz, CDCl<sub>3</sub>) 8.53 (br s, 1H); 7.32–7.24 (m, 4H); 7.18 (dd, *J* = 7.0, 1.0 Hz, 2H); 6.97 (d, *J* = 2.5 Hz, 1H); 6.88 (dd, *J* = 9.0, 2.5 Hz, 1H); 6.86 (d, *J* = 2.5 Hz, 1H); 5.61 (d, *J* = 15.0 Hz, 1H); 4.83 (t, *J* = 9.5 Hz, 1H); 3.82 (s, 3H); 3.67 (d, *J* = 14.5 Hz, 1H); 2.67–2.58 (m, 2H); 2.15–1.99 (m, 2H); 1.92–1.82 (m, 1H); 1.74–1.66 (m, 1H); <sup>13</sup>C NMR (125 MHz, CDCl<sub>3</sub>) δ 170.9, 154.3, 138.0, 132.2, 128.7, 128.2, 127.4, 126.2, 123.4, 115.9, 112.8, 112.6, 100.7, 56.1, 53.6, 47.9, 32.6, 30.1, 18.0; IR

<sup>10</sup> This product is readily racemized on silica gel and even undergoes some loss of ee with quick purification on activity III basic alumina.

(film) 3271, 2946, 1625, 1485, 1213, 1170, 800  $\text{cm}^{-1}$ ; HRMS (ESI) calcd for  $\text{C}_{21}\text{H}_{23}\text{N}_2\text{O}_2$  (M+H)  $m/z$  335.1760; found 335.1766.

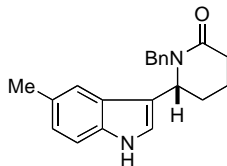

**(R)-1-benzyl-6-(5-methyl-1H-indol-3-yl)piperidin-2-one (2j).** The product was prepared by Method A on 0.34 mmol scale. The crude product was purified on activity III basic alumina (8:2  $\text{CH}_2\text{Cl}_2$ :EtOAc) to yield **2j** (0.101 g, 93% yield) as a colorless crystalline solid. This material was determined to be 94% ee by chiral SFC analysis (Pirkle S,S-Whelk, 4.0 mL/min, 220 nm, 15% MeOH,  $t_r(\text{minor}) = 7.95$  min,  $t_r(\text{major}) = 10.54$  min.  $[\alpha]_D^{29} = -54^\circ$  ( $c = 1.1$  g/100mL, MeOH);  $^1\text{H}$  NMR (500 MHz,  $\text{CDCl}_3$ ) 8.36 (br s, 1H); 7.32–7.22 (m, 5H); 7.18 (dd,  $J = 1.5, 8.5$  Hz, 2H); 7.06 (dd,  $J = 8.0, 1.0$  Hz, 1H); 6.96 (d,  $J = 2.0$  Hz, 1H); 5.62 (d,  $J = 14.5$  Hz, 1H); 4.84 (t,  $J = 5.0$  Hz, 1H); 3.66 (d,  $J = 15.0$  Hz, 1H); 2.69–2.56 (m, 2H); 2.44 (s, 3H); 2.18–2.09 (m, 1H); 2.06–1.99 (m, 1H); 1.90–1.81 (m, 1H); 1.66–1.72 (m, 1H);  $^{13}\text{C}$  NMR (125 MHz,  $\text{CDCl}_3$ )  $\delta$  171.0, 138.1, 135.4, 129.3, 128.7, 128.2, 127.4, 126.0, 124.3, 122.8, 118.5, 115.8, 111.5, 53.7, 47.9, 32.6, 30.2, 21.8, 18.0; IR (film) 3244, 2946, 2916, 1621, 1451, 1414, 1264  $\text{cm}^{-1}$ ; LRMS (ESI) calcd for  $\text{C}_{21}\text{H}_{23}\text{N}_2\text{O}$  (M+H)  $m/z$  319.2; found 319.4.

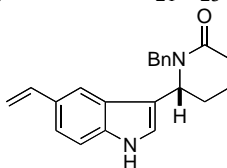

**(R)-1-benzyl-6-(5-vinyl-1H-indol-3-yl)piperidin-2-one (2k).** The product was prepared by Method A on 0.34 mmol scale. The crude product was purified on activity III basic alumina (8:2  $\text{CH}_2\text{Cl}_2$ :EtOAc) to yield **2k** (0.101 g, 93% yield) as a colorless foam. This material was determined to be 91% ee by chiral SFC analysis (ChiralPak AS-H, 4.0 mL/min, 220 nm, 20% MeOH,  $t_r(\text{minor}) = 3.62$  min,  $t_r(\text{major}) = 4.83$  min.  $[\alpha]_D^{29} = -49^\circ$  ( $c = 0.9$  g/100mL, MeOH);  $^1\text{H}$  NMR (500 MHz,  $\text{CDCl}_3$ ) 8.49 (br s, 1H); 7.42 (s, 1H); 7.39–7.36 (m, 2H); 7.32–7.22 (m, 3H); 7.17 (dd,  $J = 8.5, 1.5$  Hz, 2H); 6.98 (d,  $J = 2.0$  Hz, 1H); 6.80 (dd,  $J = 17.0, 11.0$  Hz, 1H); 5.68 (dd,  $J = 17.5, 1.0$  Hz, 1H); 5.62 (d,  $J = 14.5$  Hz, 1H); 5.16 (dd,  $J = 11.0, 1.0$  Hz, 1H); 4.87 (t,  $J = 4.5$  Hz, 1H); 3.66 (d,  $J = 15.0$  Hz, 1H); 2.70–2.56 (m, 2H); 2.16–2.10 (m, 1H); 2.09–2.00 (m, 1H); 1.90–1.82 (m, 1H); 1.76–1.66 (m, 1H);  $^{13}\text{C}$  NMR (125 MHz,  $\text{CDCl}_3$ )  $\delta$  170.6, 137.7, 137.5, 136.6, 129.9, 128.5, 128.1, 128.0, 127.2, 125.7, 122.9, 120.7, 117.0, 116.5, 111.6, 53.3, 47.7, 32.3, 30.0, 17.7; IR (film) 3249, 2947, 1617, 1475, 1354, 1264  $\text{cm}^{-1}$ ; HRMS (ESI) calcd for  $\text{C}_{22}\text{H}_{23}\text{N}_2\text{O}$  (M+H)  $m/z$  331.1805; found 331.1805.

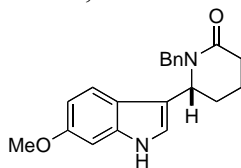

**(R)-1-benzyl-6-(6-methoxy-1H-indol-3-yl)piperidin-2-one (2l).** The product was prepared by Method A on 0.34 mmol scale. The crude product (crude ee = 92%)<sup>10</sup> was purified on activity III basic alumina (8:2  $\text{CH}_2\text{Cl}_2$ :EtOAc) to yield **2l** (0.087 g, 76% yield) as a colorless foam. This material was determined to be 88% ee by chiral SFC analysis (ChiralPak AS, 4.0 mL/min, 220 nm, 20% MeOH,  $t_r(\text{minor}) = 4.66$  min,  $t_r(\text{major}) = 6.54$  min.  $[\alpha]_D^{29} = -45^\circ$  ( $c = 0.5$  g/100mL, MeOH);  $^1\text{H}$  NMR (500 MHz,  $\text{CDCl}_3$ ) 8.43 (br s, 1H); 7.32 (d,  $J = 9.0$  Hz, 1H); 7.32–7.22 (m, 3H);<sup>9</sup> 7.17 (d,  $J = 7.0$  Hz, 1H); 6.89 (dd,  $J = 11.5, 2.0$  Hz, 1H); 6.79 (dd,  $J = 8.5, 2.0$  Hz, 1H); 5.60 (d,  $J = 15.0$  Hz, 1H); 4.81 (t,  $J =$

5.0 Hz, 1H); 3.84 (s, 3H); 3.65 (d,  $J = 15.0$  Hz, 1H); 2.67–2.54 (m, 2H); 2.12–1.98 (m, 2H); 1.92–1.82 (m, 1H); 1.72–1.68 (m, 1H);  $^{13}\text{C}$  NMR (125 MHz,  $\text{CDCl}_3$ )  $\delta$  170.7, 156.7, 137.8, 137.7, 128.5, 128.0, 127.1, 121.2, 119.9, 119.2, 116.0, 109.8, 94.9, 55.6, 53.5, 47.6, 32.4, 30.2, 17.8; IR (film) 3290, 2949, 1617, 1455, 1414, 1161  $\text{cm}^{-1}$ ; HRMS (ESI) calcd for  $\text{C}_{21}\text{H}_{23}\text{N}_2\text{O}_2$  (M+H)  $m/z$  335.1754; found 335.1759.

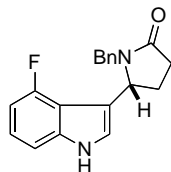

**(R)-1-benzyl-5-(4-fluoro-1H-indol-3-yl)pyrrolidin-2-one (2m).** The product was prepared by Method B on 0.34 mmol scale. The crude product (96% ee) was purified by trituration from  $\text{Et}_2\text{O}$  (2x2 mL) to yield **2m** (0.066 g, 57% yield) as a colorless crystalline solid. This material was determined to be 99% ee by chiral SFC analysis (ChiralPak AS-H, 4.0 mL/min, 220 nm, 20% MeOH,  $t_r(\text{minor}) = 3.85$  min,  $t_r(\text{major}) = 5.33$  min.  $[\alpha]_D^{29} = -39^\circ$  ( $c = 0.7$  g/100mL, MeOH);  $^1\text{H}$  NMR (500 MHz,  $\text{CDCl}_3$ ) 8.85 (br s, 1H); 7.27–7.17 (m, 4H); 7.14–7.10 (m, 3H); 7.69 (d,  $J = 2.0$  Hz, 1H); 6.77 (dd,  $J = 11.0, 7.5$  Hz, 1H); 5.07 (d,  $J = 14.5$  Hz, 1H); 4.92 (t,  $J = 7.0$  Hz, 1H); 3.72 (d,  $J = 15.0$ , 1H); 2.70 (ddd,  $J = 16.5, 10.5, 6.0$  Hz, 1H); 2.53 (ddd,  $J = 16.5, 10.0, 7.0$  Hz, 1H); 2.47–2.39 (m, 1H); 2.22–2.16 (m, 1H);  $^{13}\text{C}$  NMR (125 MHz,  $\text{CDCl}_3$ )<sup>11</sup>  $\delta$  175.6, 157.8, 155.8, 140.1, 140.0, 137.1, 128.7, 128.5, 127.5, 123.4, 123.3, 123.0, 114.9, 114.8, 114.7, 114.5, 107.9, 107.9, 105.5, 105.4, 55.3, 44.6, 30.5, 27.6; IR (film) 3221, 2926, 1661, 1449, 1420  $\text{cm}^{-1}$ ; HRMS (ESI) calcd for  $\text{C}_{19}\text{H}_{18}\text{FN}_2\text{O}$  (M+H)  $m/z$  309.1403; found 309.1397.

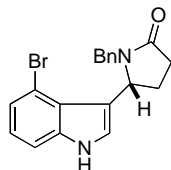

**(R)-1-benzyl-5-(4-bromo-1H-indol-3-yl)pyrrolidin-2-one (2n).** The product was prepared by Method B on 0.34 mmol scale. The crude product was purified on activity III basic alumina (8:2  $\text{CH}_2\text{Cl}_2$ :EtOAc) to yield **2n** (0.059 g, 47% yield) as a colorless foam. This material was determined to be 97% ee by chiral SFC analysis (Pirkle (*S,S*)-Whelk, 4.0 mL/min, 220 nm, 15% MeOH,  $t_r(\text{minor}) = 7.22$  min,  $t_r(\text{major}) = 9.39$  min.  $[\alpha]_D^{29} = +10^\circ$  ( $c = 0.5$  g/100mL, MeOH);  $^1\text{H}$  NMR (500 MHz,  $\text{CDCl}_3$ ) 9.35 (br s, 1H); 7.37 (d,  $J = 8.5$  Hz, 1H); 7.31–7.24 (m, 3H); 7.19 (d,  $J = 7.0$  Hz, 2H); 7.05 (d,  $J = 8.0$  Hz, 1H);<sup>9</sup> 7.03 (d,  $J = 8.0$  Hz, 1H);<sup>9</sup> 6.99 (d,  $J = 3.0$  Hz, 1H); 5.64 (d,  $J = 7.0$  Hz, 1H); 5.15 (d,  $J = 14.5$  Hz, 1H); 3.93 (d,  $J = 14.5$  Hz, 1H); 2.62–2.54 (m, 1H); 2.53–2.41 (m, 2H); 2.12–2.04 (m, 1H);  $^{13}\text{C}$  NMR (125 MHz,  $\text{CDCl}_3$ )  $\delta$  175.9, 138.3, 136.6, 128.6, 128.1, 127.5, 124.6, 124.0, 123.1, 122.2, 116.4, 113.3, 110.9, 54.4, 44.7, 29.2, 29.0; IR (film) 3243, 2925, 1667, 1446, 1336, 1186  $\text{cm}^{-1}$ ; HRMS (ESI) calcd for  $\text{C}_{19}\text{H}_{18}\text{BrN}_2\text{O}$  (M+H)  $m/z$  369.0602; found 369.0611.

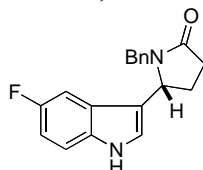

**(R)-1-benzyl-5-(5-fluoro-1H-indol-3-yl)pyrrolidin-2-one (2o).** The product was prepared by Method B on 0.34 mmol scale. The crude product was purified on activity III basic alumina (8:2

<sup>11</sup> Note extra  $^{13}\text{C}$  resonances due to C–F coupling.

CH<sub>2</sub>Cl<sub>2</sub>:EtOAc) to yield **2o** (0.058 g, 87% yield) as a colorless foam. This material was determined to be 94% ee by chiral SFC analysis (ChiralPak AS-H, 4.0 mL/min, 220 nm, 20% MeOH, *t*<sub>r</sub>(minor) = 3.25 min, *t*<sub>r</sub>(major) = 4.69 min.  $[\alpha]_D^{29} = -69^\circ$  (*c* = 1.0 g/100mL, MeOH); <sup>1</sup>H NMR (500 MHz, CDCl<sub>3</sub>) 8.89 (br s, 1H); 7.33 (dd, *J* = 9.0, 4.5 Hz, 1H); 7.28–7.23 (m, 3H); 7.10–7.06 (m, 3H); 6.97 (ddd, *J* = 9.0, 9.0, 2.0 Hz, 1H); 5.07 (d, *J* = 14.5 Hz, 1H); 4.74 (dd, *J* = 8.0, 7.0 Hz, 1H); 3.59 (d, *J* = 15.0 Hz, 1H); 2.75–2.67 (m, 1H); 2.59 (ddd, *J* = 18.0, 10.0, 8.5 Hz, 1H); 2.44–2.35 (m, 1H); 2.24–2.15 (m, 1H); <sup>13</sup>C NMR (125 MHz, CDCl<sub>3</sub>)<sup>11</sup> δ 175.1, 158.7, 156.8, 136.6, 133.5, 133.3, 128.5, 128.3, 127.4, 125.6, 125.5, 124.7, 124.6, 114.8, 112.4, 112.4, 112.3, 111.0, 110.8, 103.9, 103.7, 54.7, 44.2, 30.8, 26.7; IR (film) 3270, 1675, 1484, 1445, 1419, 702 cm<sup>-1</sup>; HRMS (ESI) calcd for C<sub>19</sub>H<sub>18</sub>FN<sub>2</sub>O (M+H) *m/z* 309.1403; found 309.1405.

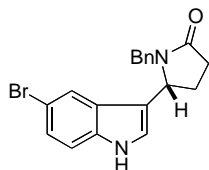

**(R)-1-benzyl-5-(5-bromo-1H-indol-3-yl)pyrrolidin-2-one (2p)**. The product was prepared by Method B on 0.34 mmol scale. The crude product was purified on activity III basic alumina (8:2 CH<sub>2</sub>Cl<sub>2</sub>:EtOAc) to yield **2p** (0.102 g, 80% yield) as a colorless foam. This material was determined to be 93% ee by chiral SFC analysis (ChiralPak AS-H, 4.0 mL/min, 220 nm, 20% MeOH, *t*<sub>r</sub>(minor) = 5.71 min, *t*<sub>r</sub>(major) = 7.41 min.  $[\alpha]_D^{28} = -51^\circ$  (*c* = 1.0 g/100mL, MeOH); <sup>1</sup>H NMR (500 MHz, CDCl<sub>3</sub>) 9.01 (br s, 1H); 7.53 (dd, *J* = 1.5, 1.0 Hz, 1H); 7.29 (d, *J* = 1.0 Hz, 1H); 7.28–7.22 (m, 3H); 7.09–7.04 (m, 2H); 7.03 (s, 1H); 5.06 (d, *J* = 14.5 Hz, 1H); 4.74 (t, *J* = 6.5 Hz, 1H); 3.59 (d, *J* = 15.0 Hz, 1H); 2.75–2.68 (m, 1H); 2.58 (ddd, *J* = 17.5, 10.0, 8.0 Hz, 1H); 2.43–2.33 (m, 1H); 2.23–2.12 (m, 1H); <sup>13</sup>C NMR (125 MHz, CDCl<sub>3</sub>) δ 175.1, 136.5, 135.4, 128.5, 128.3, 127.4, 127.0, 125.4, 124.0, 121.3, 114.3, 113.1, 113.1, 54.6, 44.3, 30.7, 26.7; IR (film) 3281, 1665, 1453, 1418, 731 cm<sup>-1</sup>; HRMS (ESI) calcd for C<sub>19</sub>H<sub>18</sub>BrN<sub>2</sub>O (M+H) *m/z* 369.0602; found 369.0602.

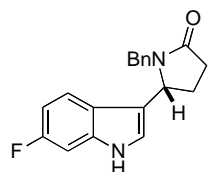

**(R)-1-benzyl-5-(6-fluoro-1H-indol-3-yl)pyrrolidin-2-one (2q)**. The product was prepared by Method B on 0.34 mmol scale. The crude product was purified on activity III basic alumina (8:2 CH<sub>2</sub>Cl<sub>2</sub>:EtOAc) to yield **2q** (0.080 g, 75% yield) as a colorless foam. This material was determined to be 96% ee by chiral SFC analysis (ChiralPak AS-H, 4.0 mL/min, 220 nm, 20% MeOH, *t*<sub>r</sub>(minor) = 3.28 min, *t*<sub>r</sub>(major) = 4.67 min.  $[\alpha]_D^{27} = -84^\circ$  (*c* = 1.1 g/100mL, MeOH); <sup>1</sup>H NMR (500 MHz, CDCl<sub>3</sub>) 8.57 (br s, 1H); 7.36 (dd, *J* = 9.0, 5.0 Hz, 1H); 7.28–7.22 (m, 3H); 7.12–7.08 (m, 3H); 7.01 (d, *J* = 2.5 Hz, 1H); 6.87 (ddd, *J* = 9.5, 9.5, 2.0 Hz, 1H); 5.07 (d, *J* = 14.5 Hz, 1H); 4.75 (dd, *J* = 8.5, 6.5 Hz, 1H); 3.57 (d, *J* = 15.0 Hz, 1H); 2.75–2.66 (m, 1H); 2.59 (ddd, *J* = 17.5, 9.5, 8.0 Hz, 1H); 2.44–2.36 (m, 1H); 2.23–2.14 (m, 1H); <sup>13</sup>C NMR (125 MHz, CDCl<sub>3</sub>)<sup>11</sup> δ 175.0, 161.1, 159.2, 137.0, 136.9, 136.7, 128.4, 128.3, 127.4, 123.2, 123.1, 121.8, 119.7, 119.6, 115.1, 108.9, 108.7, 98.1, 97.9, 54.7, 44.2, 30.8, 26.7; IR (film) 3242, 2925, 1661, 1446, 1143, 701 cm<sup>-1</sup>; HRMS (ESI) calcd for C<sub>19</sub>H<sub>17</sub>FN<sub>2</sub>NaO (M+Na) *m/z* 331.1217; found 331.1223.

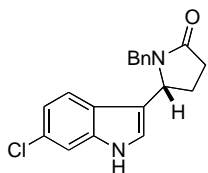

**(R)-1-benzyl-5-(6-chloro-1H-indol-3-yl)pyrrolidin-2-one (2r).** The product was prepared by Method B on 0.34 mmol scale. The crude product was purified on activity III basic alumina (8:2 CH<sub>2</sub>Cl<sub>2</sub>:EtOAc) to yield **2r** (0.090 g, 81% yield) as a colorless foam. This material was determined to be 96% ee by chiral SFC analysis (ChiralPak AS-H, 4.0 mL/min, 220 nm, 20% MeOH, *t<sub>r</sub>*(minor) = 4.67 min, *t<sub>r</sub>*(major) = 6.43 min.  $[\alpha]_D^{29} = -57^\circ$  (*c* = 0.5 g/100mL, MeOH); <sup>1</sup>H NMR (500 MHz, CDCl<sub>3</sub>) 8.69 (br s, 1H); 7.45 (d, *J* = 1.5 Hz, 1H); 7.39 (d, *J* = 7.0 Hz, 1H); 7.32–7.26 (m, 3H); 7.13–7.10 (m, 3H); 7.06 (d, *J* = 2.0 Hz, 1H); 5.11 (d, *J* = 12.5 Hz, 1H); 4.79 (t, *J* = 5.5 Hz, 1H); 3.59 (d, *J* = 12.5 Hz, 1H); 2.78–2.71 (m, 1H); 2.63 (ddd, *J* = 14.5, 8.0, 6.5 Hz, 1H); 2.48–2.40 (m, 1H); 2.25–2.18 (m, 1H); <sup>13</sup>C NMR (125 MHz, CDCl<sub>3</sub>) δ 175.1, 137.3, 136.6, 128.6, 128.5, 128.3, 127.4, 123.9, 123.5, 120.7, 119.7, 115.1, 111.6, 54.6, 44.2, 30.8, 26.8; IR (film) 3245, 1669, 1459, 1419, 1258, 804, 703 cm<sup>-1</sup>; HRMS (ESI) calcd for C<sub>19</sub>H<sub>17</sub>ClN<sub>2</sub>NaO (M+Na) *m/z* 347.0922; found 347.0929.

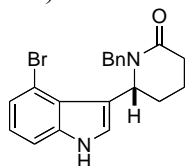

**(R)-1-benzyl-6-(4-bromo-1H-indol-3-yl)piperidin-2-one (2s).** The product was prepared by Method B on 0.34 mmol scale. The crude product was purified on activity III basic alumina (8:2 CH<sub>2</sub>Cl<sub>2</sub>:EtOAc) to yield **2s** (0.016 g, 12% yield) as a colorless foam. This material was determined to be 85% ee by chiral SFC analysis (Pirkle (*S,S*)-Whelk, 4.0 mL/min, 220 nm, 15% MeOH, *t<sub>r</sub>*(minor) = 5.86 min, *t<sub>r</sub>*(major) = 6.56 min.  $[\alpha]_D^{29} = -21^\circ$  (*c* = 0.5 g/100mL, MeOH); <sup>1</sup>H NMR (500 MHz, *d*<sub>6</sub>-DMSO) 11.6 (br s, 1H); 7.52 (d, *J* = 7.5 Hz, 1H); 7.42–7.38 (m, 2H); 7.35–7.31 (m, 2H); 7.28–7.22 (m, 3H); 7.09 (t, *J* = 8.0 Hz, 1H); 5.59–5.51 (m, 1H); 5.43 (d, *J* = 15.5 Hz, 1H); 3.69 (d, *J* = 15.5 Hz, 1H); 2.60–4.46 (m, 2H); 2.16–2.06 (m, 2H); 1.86–1.78 (m, 1H); 1.69–1.60 (m, 1H); <sup>13</sup>C NMR (125 MHz, *d*<sub>6</sub>-DMSO) δ 169.2, 138.4, 137.9, 128.4, 127.3, 126.9, 125.4, 123.7, 123.1, 122.3, 114.8, 112.2, 111.5, 52.3, 47.5, 31.6, 30.3, 15.7; IR (film) 3247, 2954, 1617, 1413, 1334, 1178, 734 cm<sup>-1</sup>; HRMS (ESI) calcd for C<sub>20</sub>H<sub>20</sub>BrN<sub>2</sub>O (M+H) *m/z* 383.0754; found 383.0753.

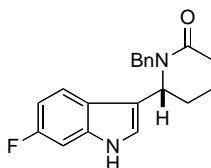

**(R)-1-benzyl-6-(6-fluoro-1H-indol-3-yl)piperidin-2-one (2t).** The product was prepared by Method B on 0.34 mmol scale. The crude product was purified on activity III basic alumina (8:2 CH<sub>2</sub>Cl<sub>2</sub>:EtOAc) to yield **2t** (0.016 g, 12% yield) as a colorless foam. This material was determined to be 96% ee by chiral SFC analysis (Pirkle (*S,S*)-Whelk, 4.0 mL/min, 220 nm, 15% MeOH, *t<sub>r</sub>*(minor) = 6.43 min, *t<sub>r</sub>*(major) = 8.44 min.  $[\alpha]_D^{32} = -52^\circ$  (*c* = 0.5 g/100mL, MeOH); <sup>1</sup>H NMR (500 MHz, CDCl<sub>3</sub>) 8.91 (br s, 1H); 7.35 (dd, *J* = 8.5, 5.0 Hz, 1H); 7.31–7.22 (m, 3H); 7.16 (d, *J* = 8.5 Hz, 2H); 7.09 (dd, *J* = 9.5, 2.5 Hz, 1H); 6.97 (d, *J* = 2.0 Hz, 1H); 6.87 (ddd, *J* = 10.0, 10.0, 2.5 Hz, 1H); 5.59 (d, *J* = 15.0, 1H); 4.83 (t, *J* = 5.0 Hz, 1H); 3.66 (d, *J* = 15.0 Hz, 1H); 2.70–2.56 (m, 2H); 2.12–2.00 (m, 2H); 1.91–

1.81 (m, 1H); 1.75–1.67 (m, 1H);  $^{13}\text{C}$  NMR (125 MHz,  $\text{CDCl}_3$ ) $^{11}$   $\delta$  170.8, 161.0, 159.1, 137.5, 136.9, 136.8, 128.5, 127.9, 127.2, 122.81, 122.79, 122.1, 119.3, 119.2, 115.9, 108.6, 108.4, 98.0, 97.8, 53.4, 47.7, 32.3, 30.1, 17.7; IR (film) 3262, 2951, 1624, 1452, 1143, 953  $\text{cm}^{-1}$ ; HRMS (ESI) calcd for  $\text{C}_{20}\text{H}_{19}\text{FN}_2\text{NaO}$  (M+Na)  $m/z$  345.1374; found 345.1379.

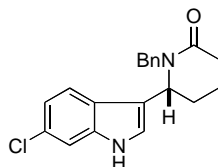

**(R)-1-benzyl-6-(6-chloro-1H-indol-3-yl)piperidin-2-one (2u).** The product was prepared by Method B on 0.34 mmol scale. The crude product was purified on activity III basic alumina (8:2  $\text{CH}_2\text{Cl}_2$ :EtOAc) to yield **2u** (0.046 g, 40% yield) as a colorless foam. This material was determined to be 92% ee by chiral SFC analysis (ChiralPak AS-H, 4.0 mL/min, 220 nm, 20% MeOH,  $t_r$ (minor) = 4.27 min,  $t_r$ (major) = 5.77 min.  $[\alpha]_D^{29} = -35^\circ$  ( $c = 0.7$  g/100mL, MeOH);  $^1\text{H}$  NMR (500 MHz,  $\text{CDCl}_3$ ) 8.90 (br s, 1H); 7.40 (d,  $J = 1.5$  Hz, 1H); 7.35 (d,  $J = 8.5$  Hz, 1H); 7.32–7.49 (m, 3H); 7.15 (d,  $J = 8.5$  Hz, 2H); 7.07 (dd,  $J = 8.5, 2.0$  Hz, 1H); 6.98 (d,  $J = 2.5$  Hz, 1H); 5.60 (d,  $J = 15.0$  Hz, 1H); 4.83 (t,  $J = 5.0$  Hz, 1H); 3.64 (d,  $J = 14.5$  Hz, 1H); 2.69–2.57 (m, 2H); 2.09–2.00 (m, 2H); 1.89–1.82 (m, 1H); 1.75–1.68 (m, 1H);  $^{13}\text{C}$  NMR (125 MHz,  $\text{CDCl}_3$ )  $\delta$  170.8, 137.5, 137.2, 128.5, 128.3, 127.9, 127.3, 124.1, 123.1, 120.5, 119.4, 116.0, 111.6, 53.3, 47.7, 32.3, 30.2, 17.7; IR (film) 3245, 2948, 1620, 1451, 1413, 1264  $\text{cm}^{-1}$ ; HRMS (ESI) calcd for  $\text{C}_{20}\text{H}_{20}\text{ClN}_2\text{O}$  (M+H)  $m/z$  339.1259; found 339.1274.

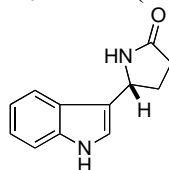

**(R)-5-(1H-indol-3-yl)pyrrolidin-2-one (15).** A 3-neck reaction vessel fitted with a liquid  $\text{NH}_3$  condenser was charged with **2a** (38.5 mg, 0.13 mmol, 94% ee) under a positive flow of  $\text{N}_2$  and THF (1 mL) was added. The solution and condenser were cooled to  $-78^\circ\text{C}$ . In a separate 3-neck flask with an attached bubbler was cooled to  $-78^\circ\text{C}$  and  $\text{NH}_3$  (~50 mL) was condensed directly from the tank into this flask. The  $\text{NH}_3$  (~10 mL) was then redistilled from the 3-neck flask *via* cannula into the reaction vessel containing **2a**. Sodium metal (45 mg, 2.0 mmol) was added to the reaction to create a dark blue solution. After 10 min, isoprene (~1 mL) was added until the dark blue color dissipated, giving a yellow solution. Solid  $\text{NH}_4\text{Cl}$  was added until a colorless mixture was produced. The mixture was allowed to warm slowly to rt, and was partitioned between  $\text{H}_2\text{O}$  (10 mL) and EtOAc (20 mL). The layers were separated and the aqueous layer was extracted with EtOAc (3x10 mL). The combined organic layers were dried ( $\text{Na}_2\text{SO}_4$ ), concentrated *in vacuo*, and the residue purified on activity III basic alumina to provide 22 mg (85% yield) of **15** as a colorless solid. This material was determined to be 94% ee by chiral SFC analysis (ChiralPak AD-H, 4.0 mL/min, 220 nm, 20% MeOH,  $t_r$ (minor) = 5.81 min,  $t_r$ (major) = 7.71 min.  $[\alpha]_D^{29} = +29^\circ$  ( $c = 0.5$  g/100mL, MeOH);  $^1\text{H}$  NMR (500 MHz,  $\text{CDCl}_3$ ) 8.46 (br s, 1H); 7.60 (d,  $J = 8.0$  Hz, 1H); 7.39 (ddd,  $J = 8.0, 1.0, 1.0$  Hz, 1H); 7.22 (ddd,  $J = 7.5, 7.5, 1.5$  Hz, 1H); 7.13 (ddd,  $J = 8.0, 8.0, 1.0$  Hz, 1H); 7.10 (d,  $J = 2.5$  Hz, 1H); 6.29 (br s, 1H); 5.07 (t,  $J = 5.5$  Hz, 1H); 2.60–2.42 (m, 3H); 2.30–2.20 (m, 1H);  $^{13}\text{C}$  NMR (125 MHz,  $\text{CDCl}_3$ )  $\delta$  178.3, 136.9, 125.1, 122.5, 121.1, 119.8, 118.8, 117.1, 111.6, 51.5, 30.5, 29.5; IR (film) 3404, 3267, 1683, 1457, 1264  $\text{cm}^{-1}$ ; HRMS (ESI) calcd for  $\text{C}_{12}\text{H}_{12}\text{N}_2\text{O}$  (M+H)  $m/z$  201.1022; found 201.1021.

**F. Chiral SFC Data**Racemate: ChiralPak AS-H, 20% MeOH, 220 nm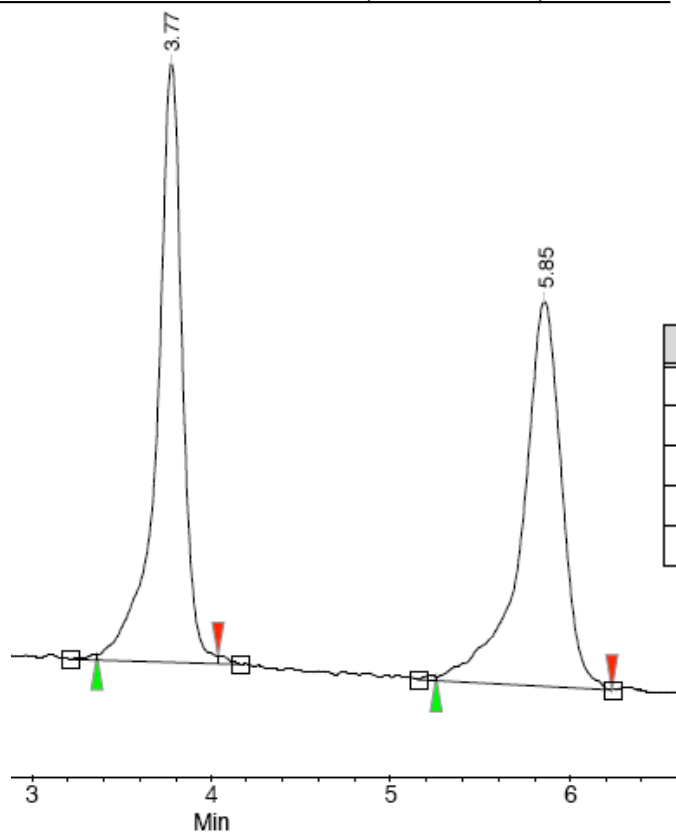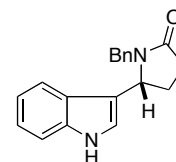

| Index | Time  | Height | Area      | Area    |
|-------|-------|--------|-----------|---------|
|       | [Min] | [mAU]  | [mAU*min] | [%]     |
| 1     | 3.77  | 85.37  | 14.35     | 50.231  |
| 2     | 5.85  | 55.01  | 14.21     | 49.769  |
| Total |       |        | 28.56     | 100.000 |

99% ee

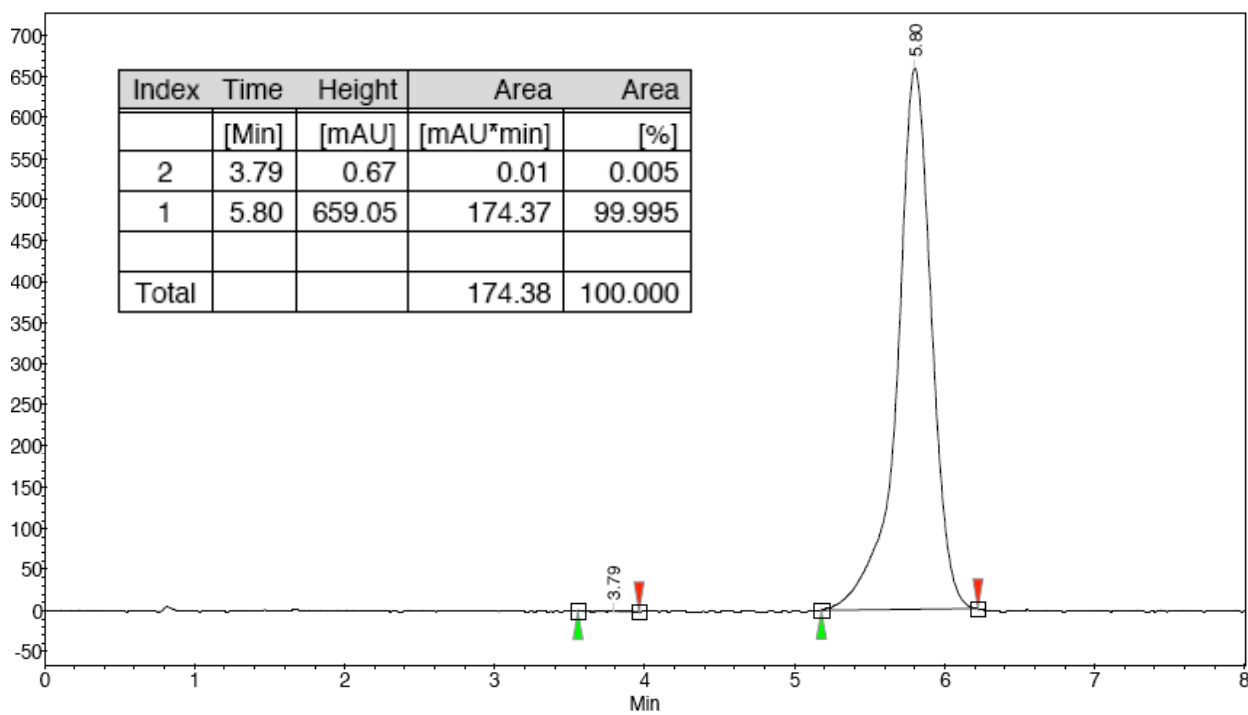

| Index | Time  | Height | Area      | Area    |
|-------|-------|--------|-----------|---------|
|       | [Min] | [mAU]  | [mAU*min] | [%]     |
| 2     | 3.79  | 0.67   | 0.01      | 0.005   |
| 1     | 5.80  | 659.05 | 174.37    | 99.995  |
| Total |       |        | 174.38    | 100.000 |



Racemate: ChiralPak AD-H, 10 MeOH/CO<sub>2</sub>, 220 nm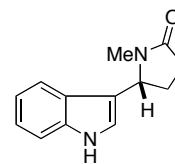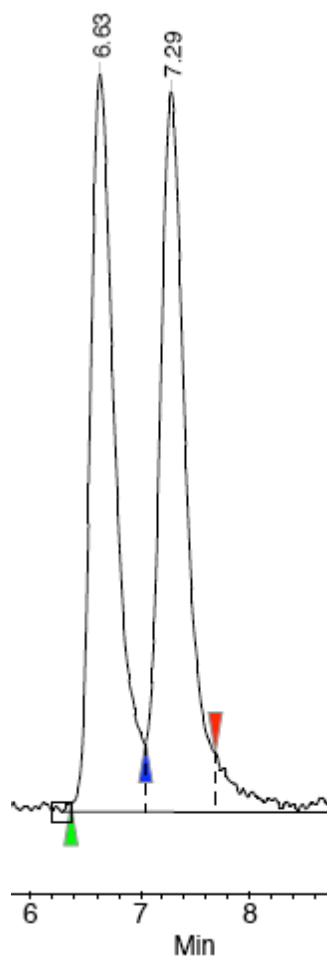

| Index | Time [Min] | Height [mAU] | Area [mAU*min] | Area [%] |
|-------|------------|--------------|----------------|----------|
| 1     | 0.86       | 25.12        | 2.40           | 3.853    |
| 2     | 6.63       | 111.73       | 29.50          | 47.377   |
| 3     | 7.29       | 108.94       | 30.37          | 48.771   |
| Total |            |              | 62.28          | 100.000  |

86% ee

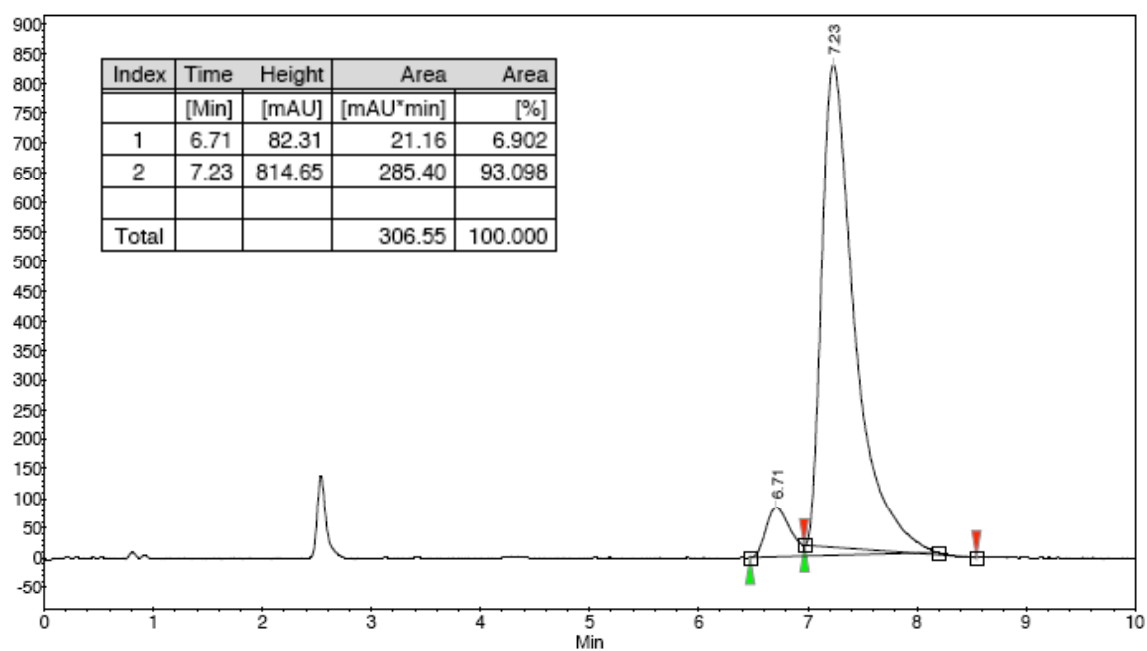

Racemate: Pirkle (*S,S*)-Whelk, 15% MeOH, 220 nm

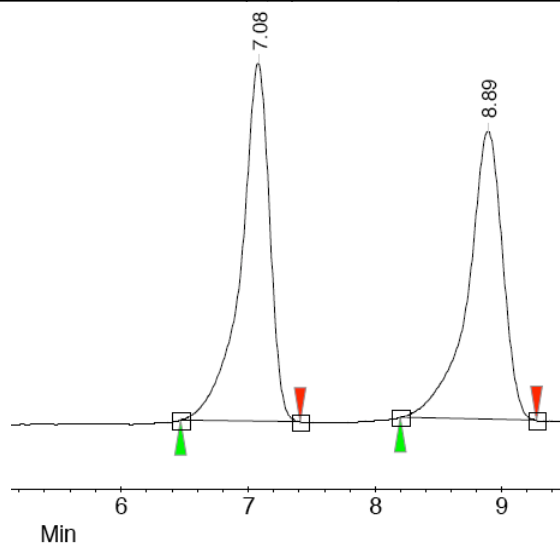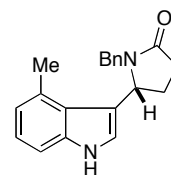

| Index | Time  | Height | Area      | Area    |
|-------|-------|--------|-----------|---------|
|       | [Min] | [mAU]  | [mAU*min] | [%]     |
| 1     | 7.08  | 842.85 | 223.32    | 50.637  |
| 2     | 8.89  | 679.70 | 217.71    | 49.363  |
| Total |       |        | 441.03    | 100.000 |

95% ee

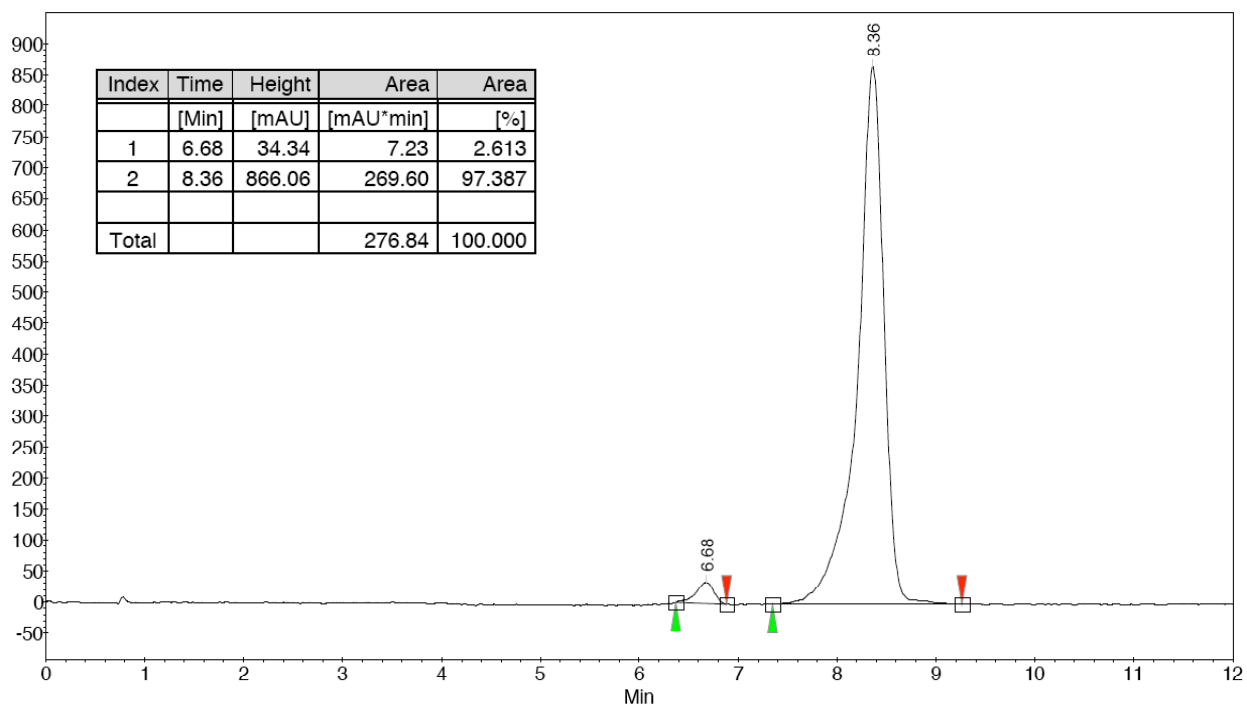

Racemate: ChiralPak AS-H, 20% MeOH, 220 nm

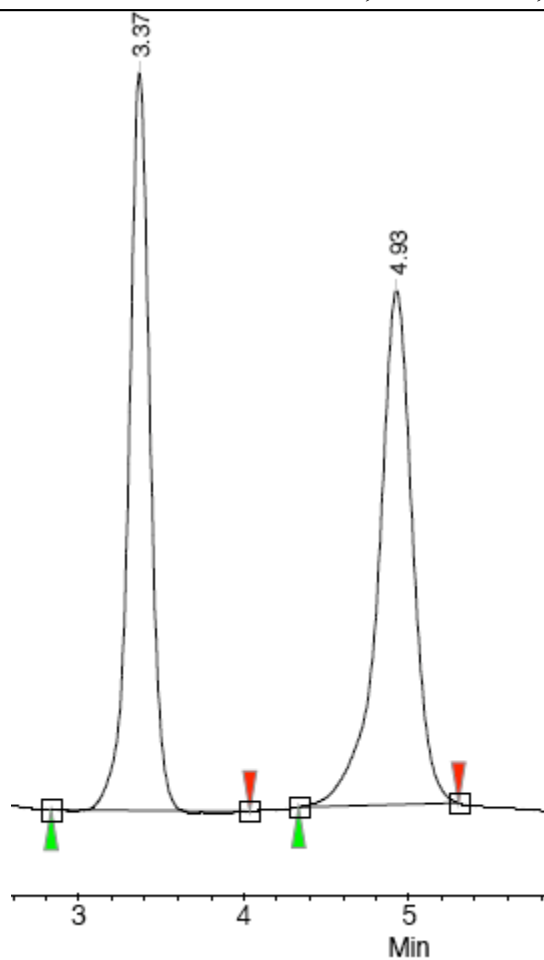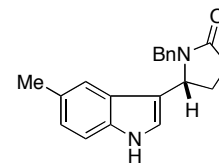

| Index | Time  | Height | Area      | Area    |
|-------|-------|--------|-----------|---------|
|       | [Min] | [mAU]  | [mAU*min] | [%]     |
| 2     | 3.37  | 392.72 | 57.75     | 46.643  |
| 1     | 4.93  | 273.79 | 66.06     | 53.357  |
| Total |       |        | 123.80    | 100.000 |

91% ee

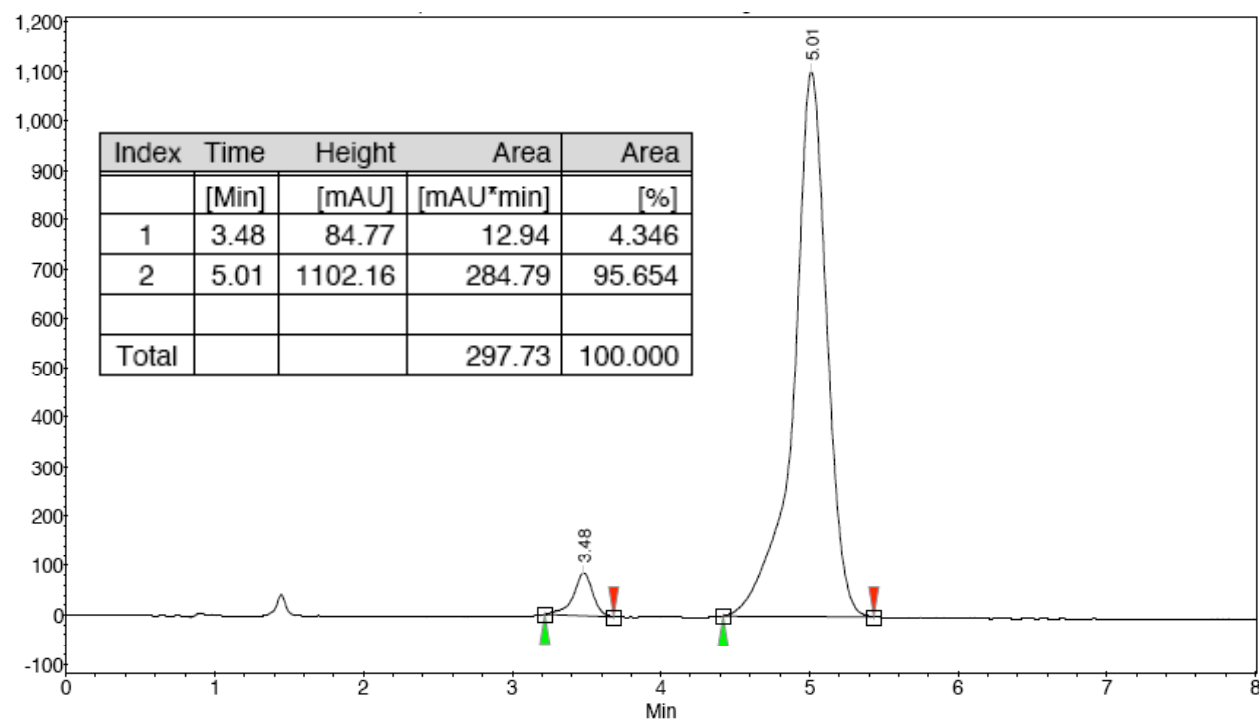

| Index | Time  | Height  | Area      | Area    |
|-------|-------|---------|-----------|---------|
|       | [Min] | [mAU]   | [mAU*min] | [%]     |
| 1     | 3.48  | 84.77   | 12.94     | 4.346   |
| 2     | 5.01  | 1102.16 | 284.79    | 95.654  |
| Total |       |         | 297.73    | 100.000 |

Racemate: ChiralPak AS-H, 20 % MeOH, 220 nm

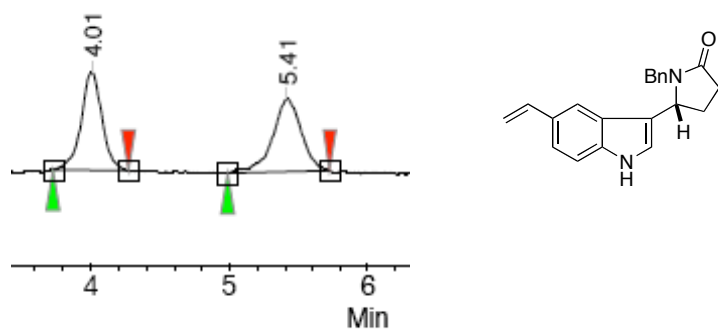

| Index | Time  | Height | Area      | Area    |
|-------|-------|--------|-----------|---------|
|       | [Min] | [mAU]  | [mAU*min] | [%]     |
| 1     | 4.01  | 63.08  | 11.03     | 49.768  |
| 2     | 5.41  | 46.46  | 11.14     | 50.232  |
| Total |       |        | 22.17     | 100.000 |

90% ee

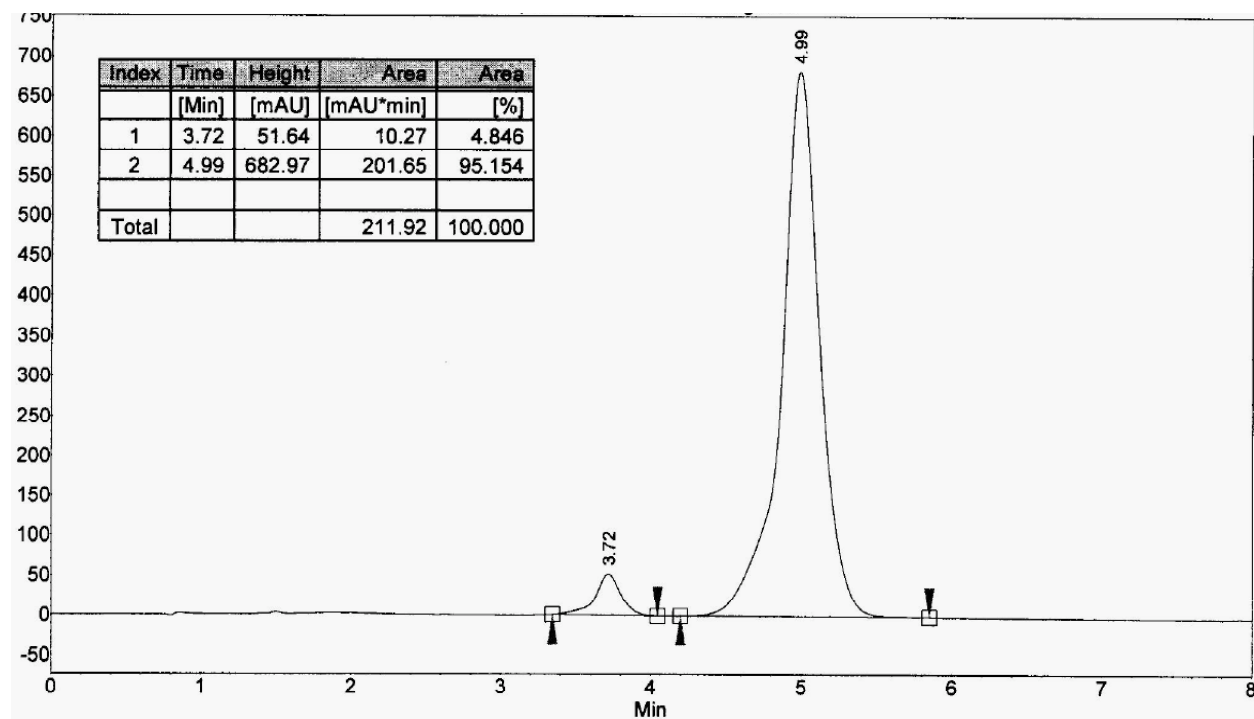

Racemate: ChiralPak, AS-H, 20% MeOH/CO<sub>2</sub>, 220 nm

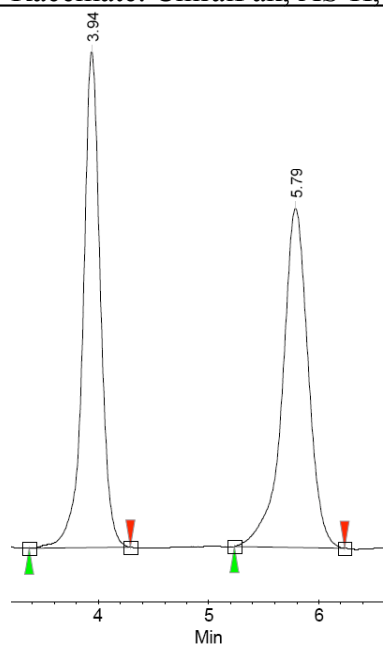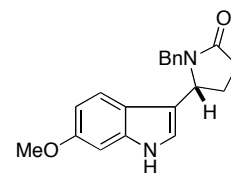

| Index | Time  | Height | Area      | Area    |
|-------|-------|--------|-----------|---------|
|       | [Min] | [mAU]  | [mAU*min] | [%]     |
| 1     | 3.94  | 715.40 | 129.63    | 49.403  |
| 2     | 5.79  | 489.48 | 132.76    | 50.597  |
| Total |       |        | 262.39    | 100.000 |

98% ee

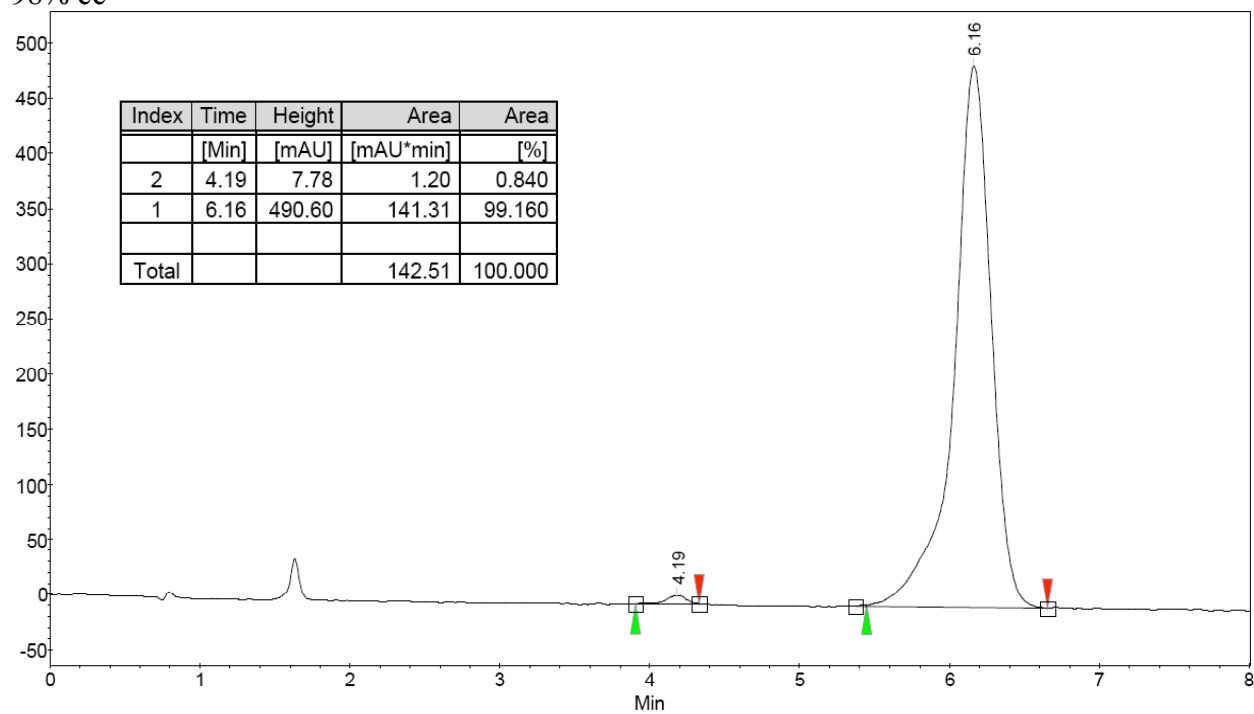

Racemate: ChiralPak AD-H, 20% MeOH/CO<sub>2</sub>, 220 nm

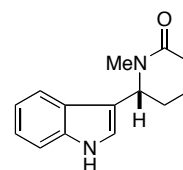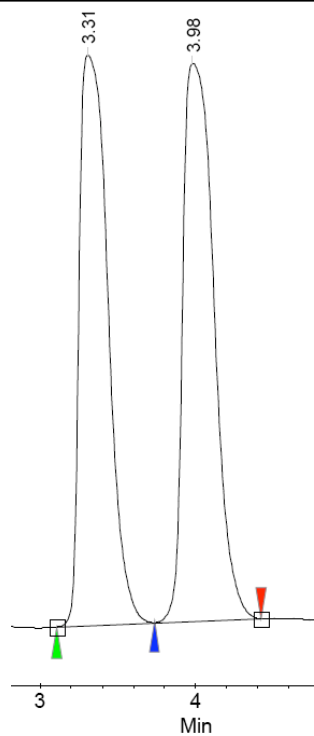

| Index | Time  | Height  | Area      | Area    |
|-------|-------|---------|-----------|---------|
|       | [Min] | [mAU]   | [mAU*min] | [%]     |
| 1     | 3.31  | 2282.13 | 482.11    | 48.472  |
| 2     | 3.98  | 2232.25 | 512.50    | 51.528  |
| Total |       |         | 994.61    | 100.000 |

92% ee

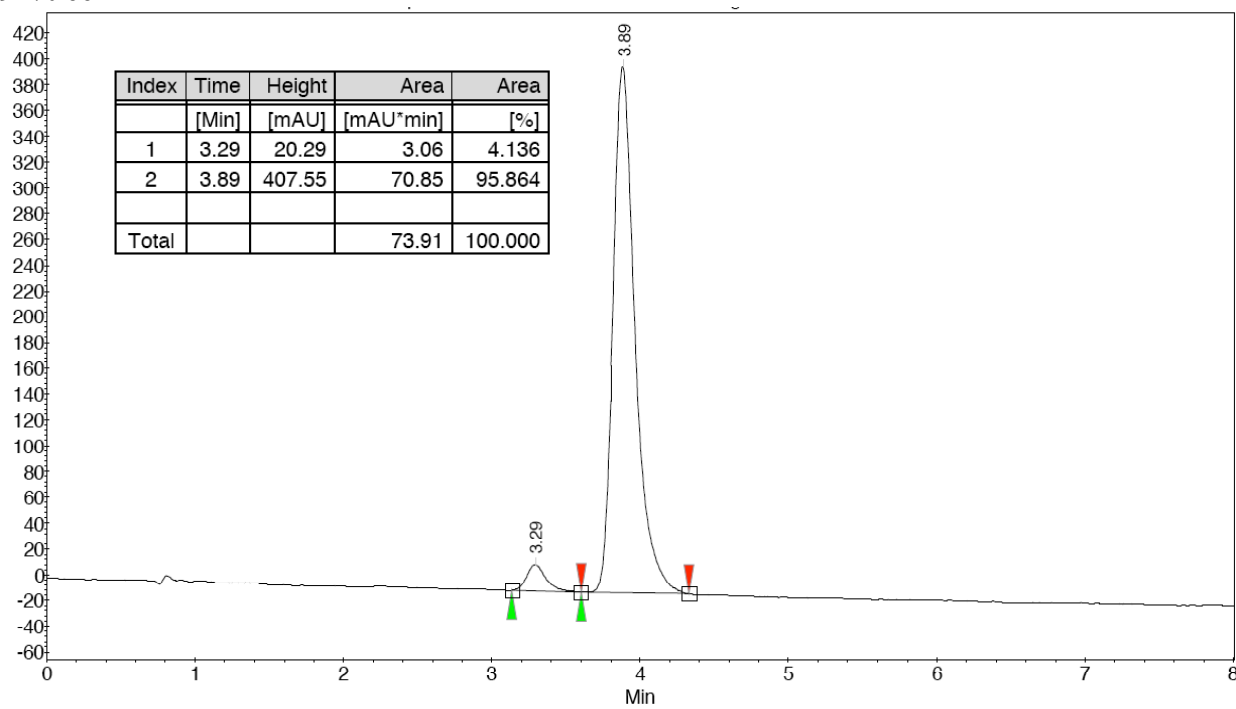

Racemate: ChiralPak AS-H, 20% MeOH/CO<sub>2</sub>, 220 nm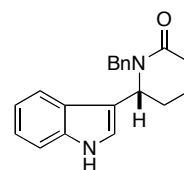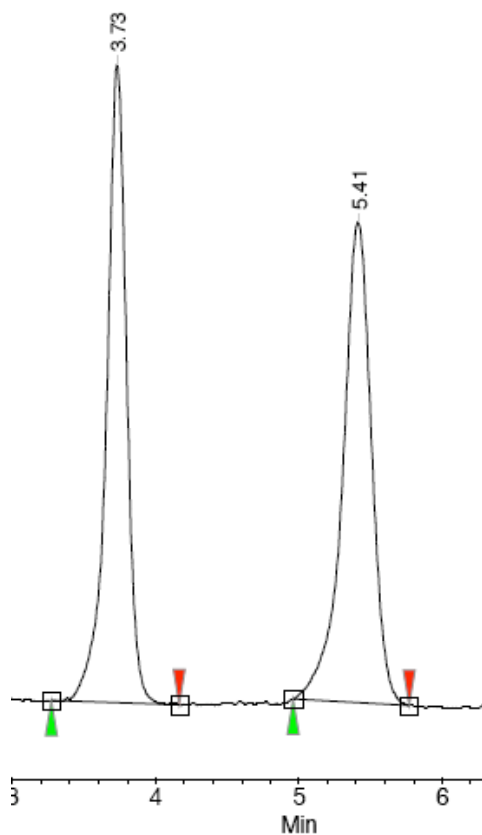

| Index | Time  | Height | Area      | Area    |
|-------|-------|--------|-----------|---------|
|       | [Min] | [mAU]  | [mAU*min] | [%]     |
| 2     | 3.73  | 188.41 | 30.57     | 48.016  |
| 1     | 5.41  | 141.82 | 33.09     | 51.984  |
| Total |       |        | 63.66     | 100.000 |

93% ee

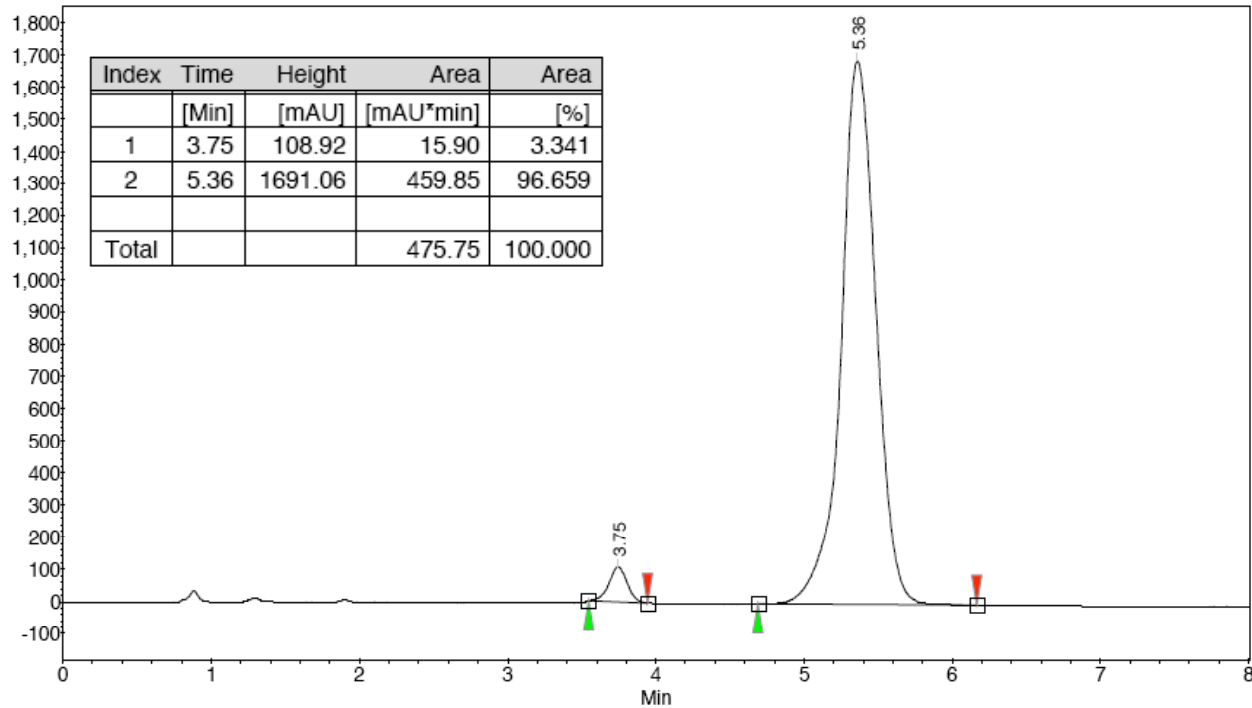

Racemate: ChiralPak AS-H, 20% MeOH/CO<sub>2</sub>, 220 nm

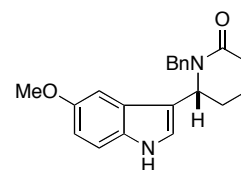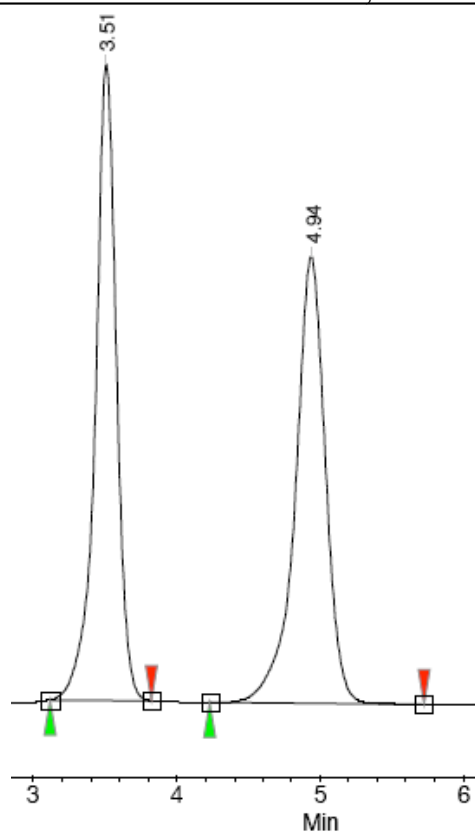

| Index | Time [Min] | Height [mAU] | Area [mAU*min] | Area [%] |
|-------|------------|--------------|----------------|----------|
| 1     | 3.51       | 556.19       | 94.56          | 49.667   |
| 2     | 4.94       | 390.92       | 95.83          | 50.333   |
| Total |            |              | 190.39         | 100.000  |

90%ee

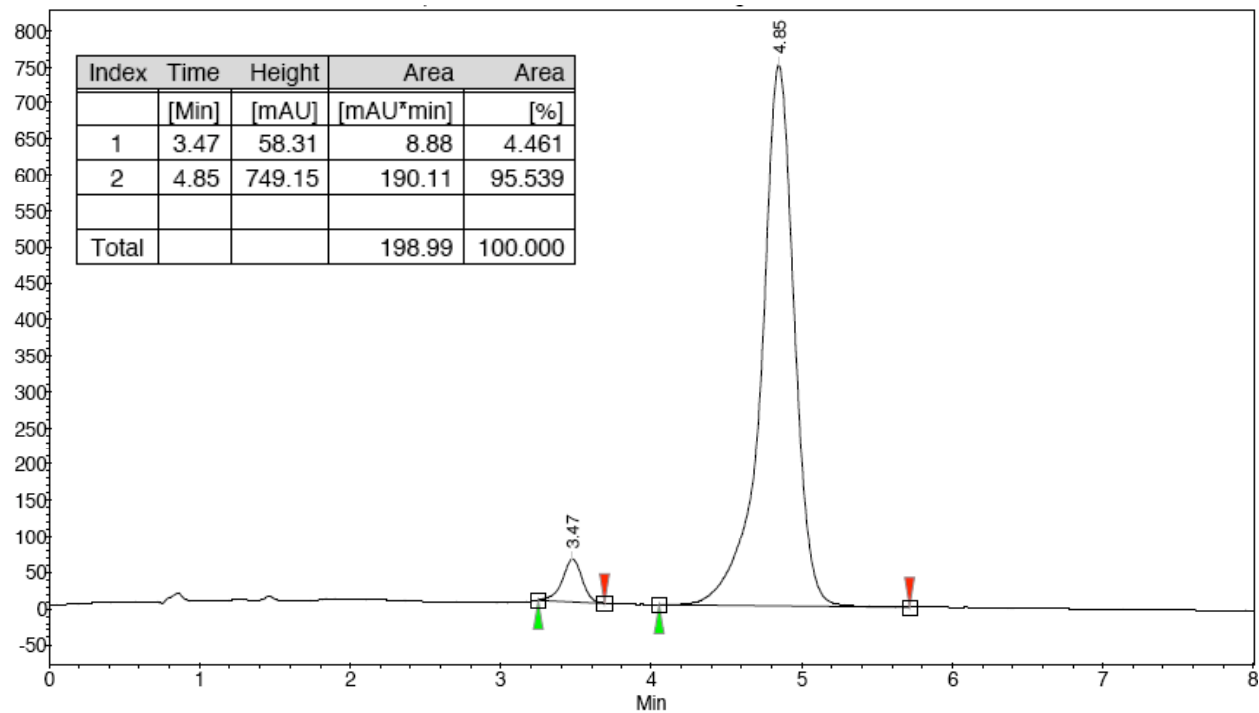

| Index | Time [Min] | Height [mAU] | Area [mAU*min] | Area [%] |
|-------|------------|--------------|----------------|----------|
| 1     | 3.47       | 58.31        | 8.88           | 4.461    |
| 2     | 4.85       | 749.15       | 190.11         | 95.539   |
| Total |            |              | 198.99         | 100.000  |



Racemate: Pirkle (*S,S*)-Whelk, 15% MeOH, 220 nm

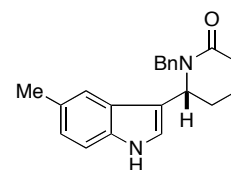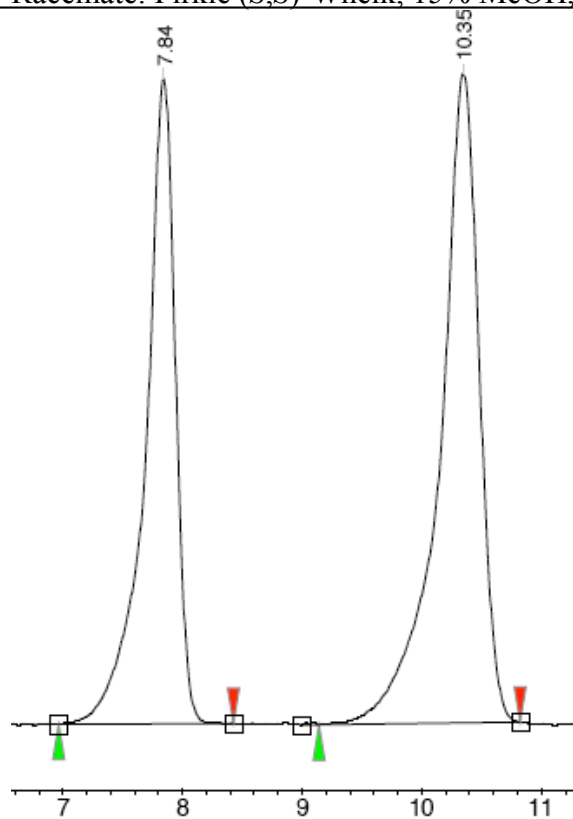

| Index | Time  | Height | Area      | Area    |
|-------|-------|--------|-----------|---------|
|       | [Min] | [mAU]  | [mAU*min] | [%]     |
| 2     | 7.84  | 437.16 | 126.63    | 43.027  |
| 1     | 10.35 | 439.77 | 167.67    | 56.973  |
| Total |       |        | 294.30    | 100.000 |

94% ee

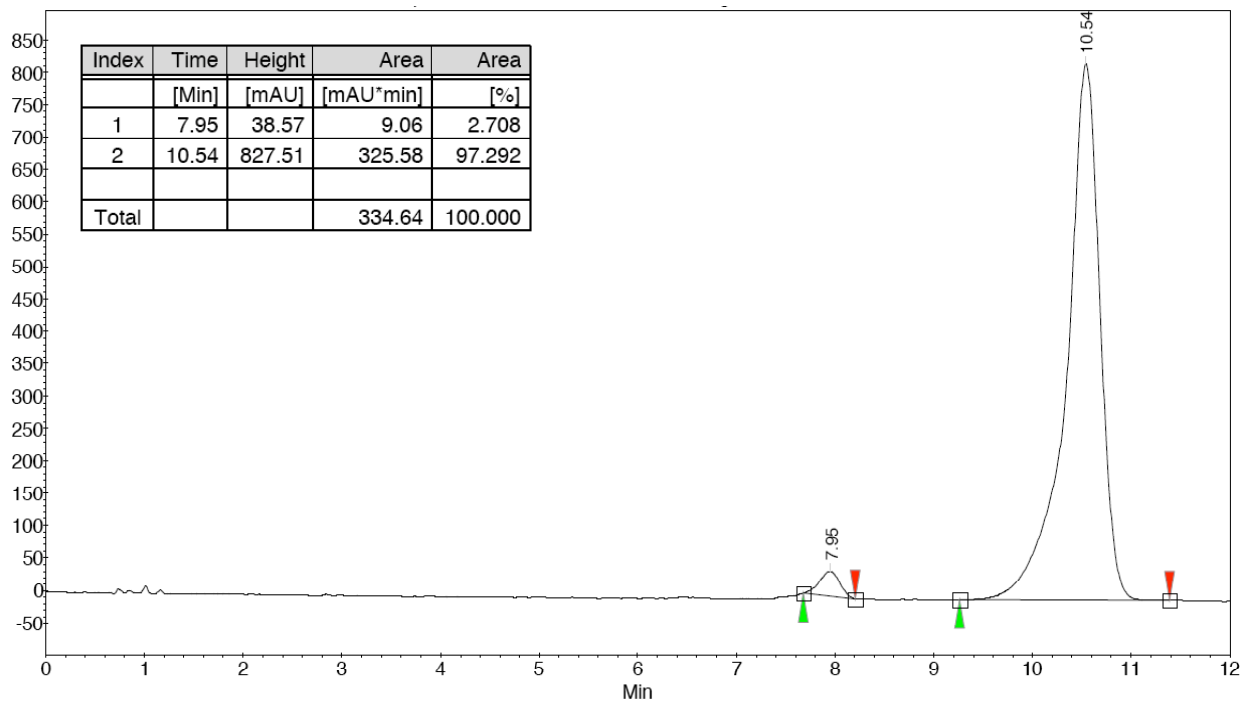

Racemate: ChiralPak AS-H, 20% MeOH/CO<sub>2</sub>, 220 nm

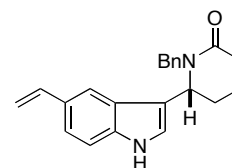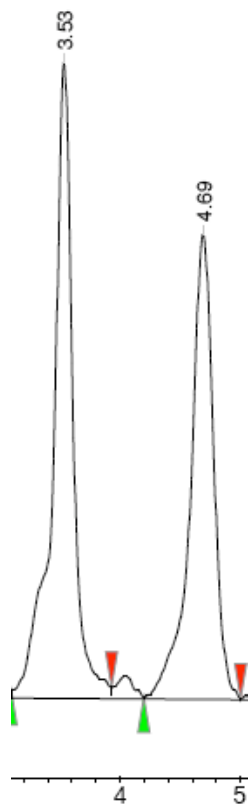

| Index | Time  | Height | Area      | Area    |
|-------|-------|--------|-----------|---------|
|       | [Min] | [mAU]  | [mAU*min] | [%]     |
| 1     | 3.53  | 127.17 | 24.48     | 53.892  |
| 2     | 4.69  | 93.13  | 20.95     | 46.108  |
| Total |       |        | 45.43     | 100.000 |

91% ee

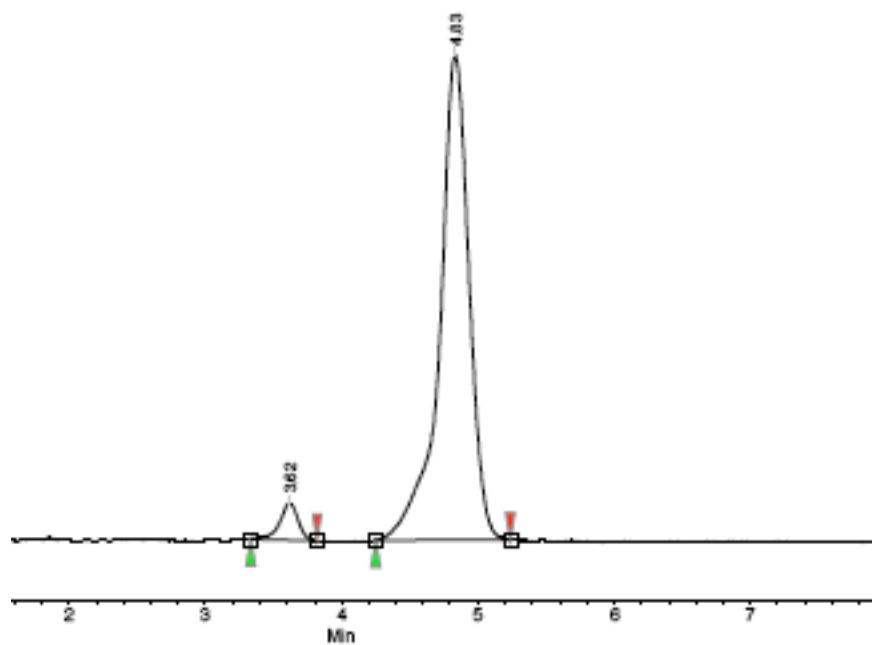

| Index | Time  | Height | Area      | Area    |
|-------|-------|--------|-----------|---------|
|       | [Min] | [mAU]  | [mAU*min] | [%]     |
| 1     | 3.62  | 42.37  | 6.64      | 4.536   |
| 2     | 4.83  | 559.83 | 139.78    | 95.464  |
| Total |       |        | 146.42    | 100.000 |

Racemate: ChiralPak AS, 20%MeOH/CO<sub>2</sub>, 220 nm

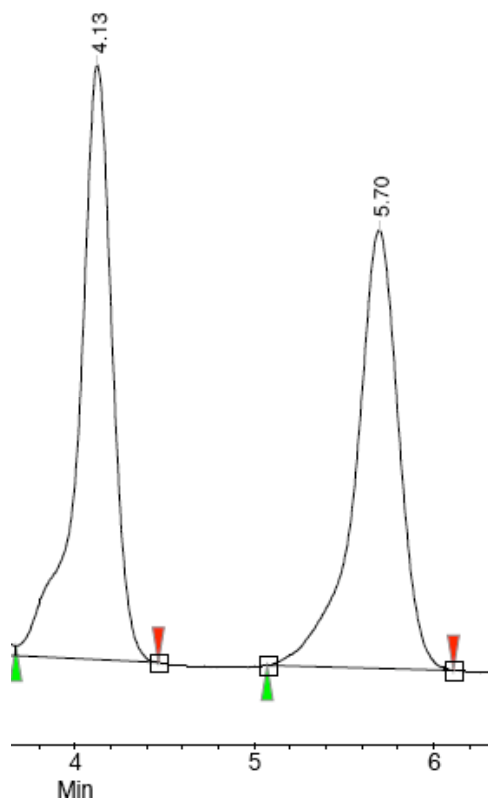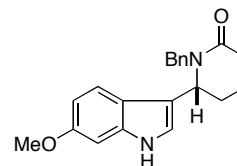

| Index | Time  | Height | Area      | Area    |
|-------|-------|--------|-----------|---------|
|       | [Min] | [mAU]  | [mAU*min] | [%]     |
| 1     | 4.13  | 275.72 | 60.36     | 51.180  |
| 2     | 5.70  | 203.58 | 57.57     | 48.820  |
| Total |       |        | 117.93    | 100.000 |

88% ee

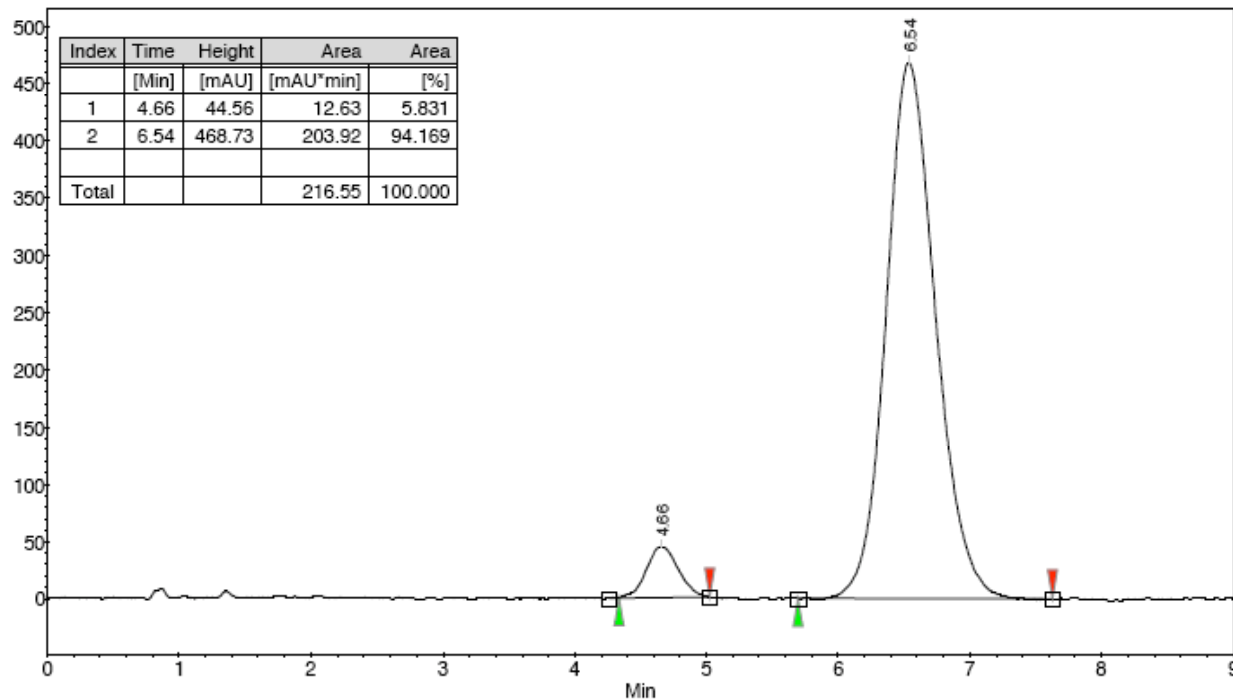

| Index | Time  | Height | Area      | Area    |
|-------|-------|--------|-----------|---------|
|       | [Min] | [mAU]  | [mAU*min] | [%]     |
| 1     | 4.66  | 44.56  | 12.63     | 5.831   |
| 2     | 6.54  | 468.73 | 203.92    | 94.169  |
| Total |       |        | 216.55    | 100.000 |

Racemate: ChiralPak AS-H, 20%MeOH/CO<sub>2</sub>, 220 nm

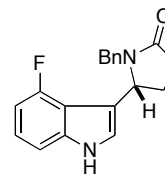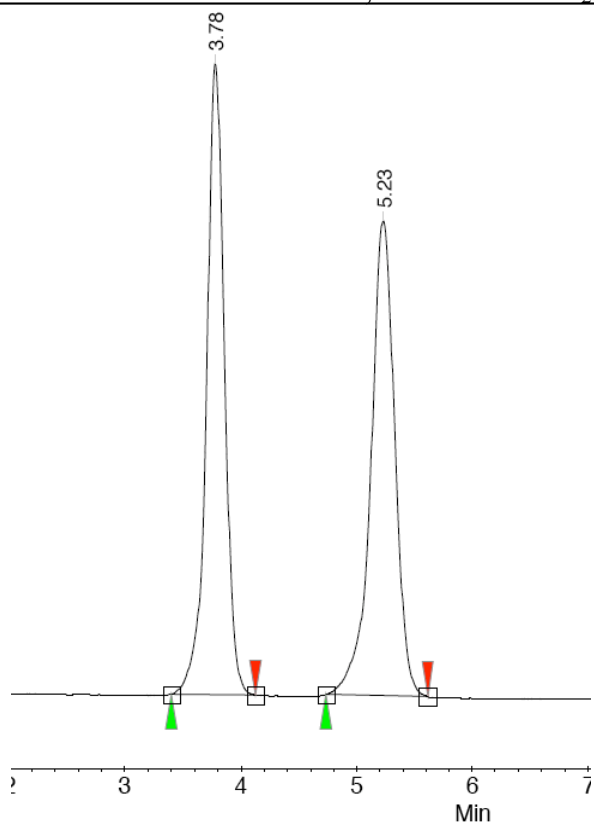

| Index | Time  | Height  | Area      | Area    |
|-------|-------|---------|-----------|---------|
|       | [Min] | [mAU]   | [mAU*min] | [%]     |
| 1     | 3.78  | 1126.95 | 202.03    | 49.857  |
| 2     | 5.23  | 847.52  | 203.20    | 50.143  |
| Total |       |         | 405.23    | 100.000 |

99% ee

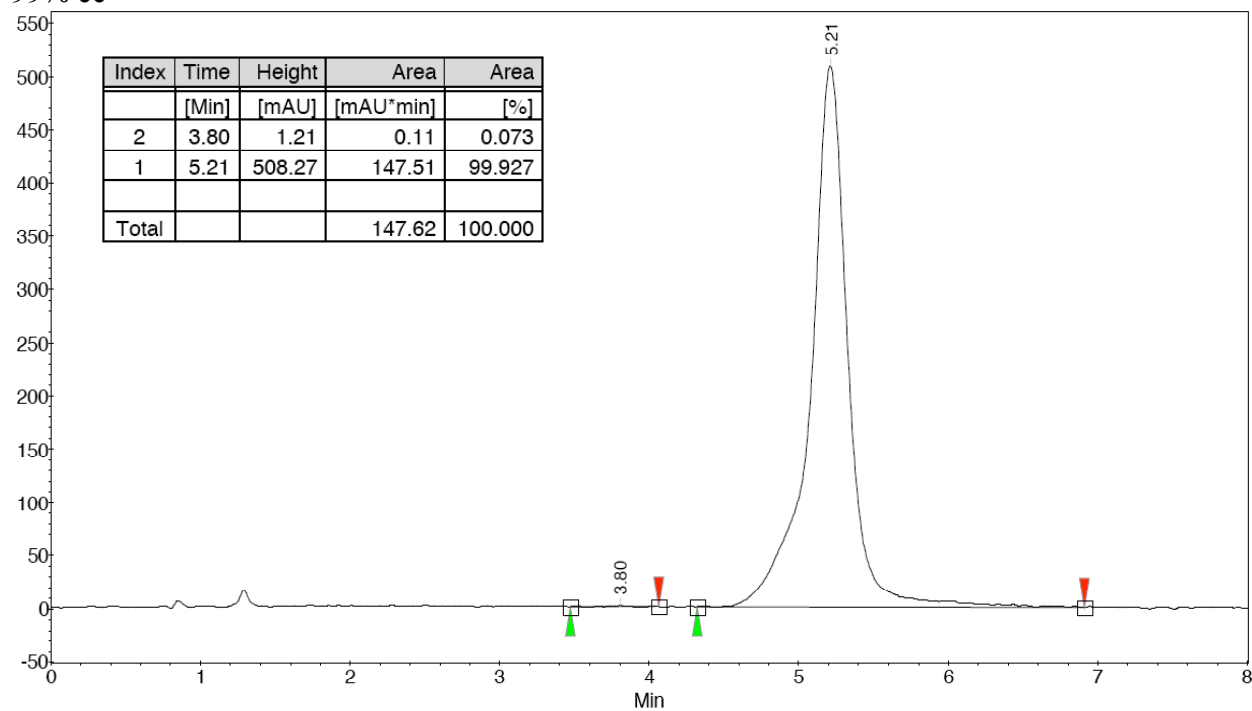

| Index | Time  | Height | Area      | Area    |
|-------|-------|--------|-----------|---------|
|       | [Min] | [mAU]  | [mAU*min] | [%]     |
| 2     | 3.80  | 1.21   | 0.11      | 0.073   |
| 1     | 5.21  | 508.27 | 147.51    | 99.927  |
| Total |       |        | 147.62    | 100.000 |

Racemate: Pirkle (*S,S*)-Whelk, 15%MeOH/CO<sub>2</sub> 220 nm

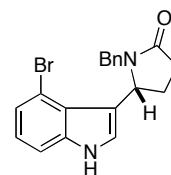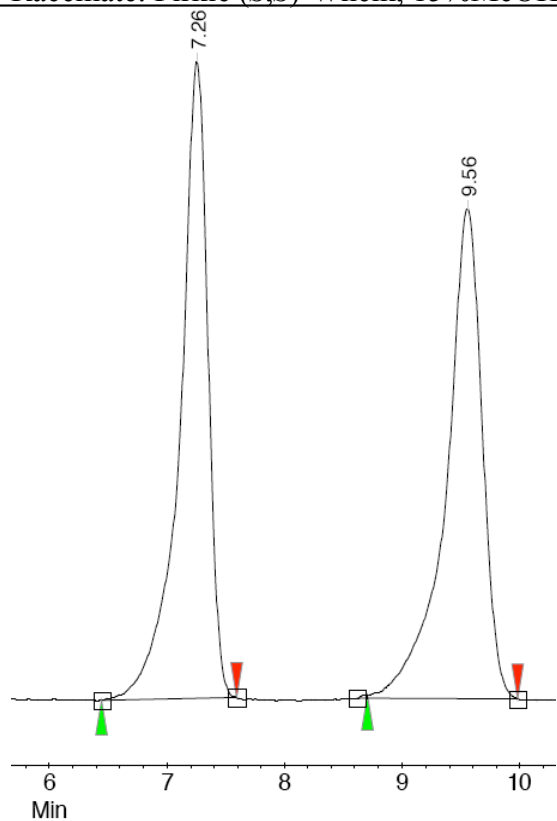

| Index | Time [Min] | Height [mAU] | Area [mAU*min] | Area [%] |
|-------|------------|--------------|----------------|----------|
| 1     | 7.26       | 670.68       | 184.82         | 50.117   |
| 2     | 9.56       | 515.95       | 183.95         | 49.883   |
| Total |            |              | 368.77         | 100.000  |

97% ee

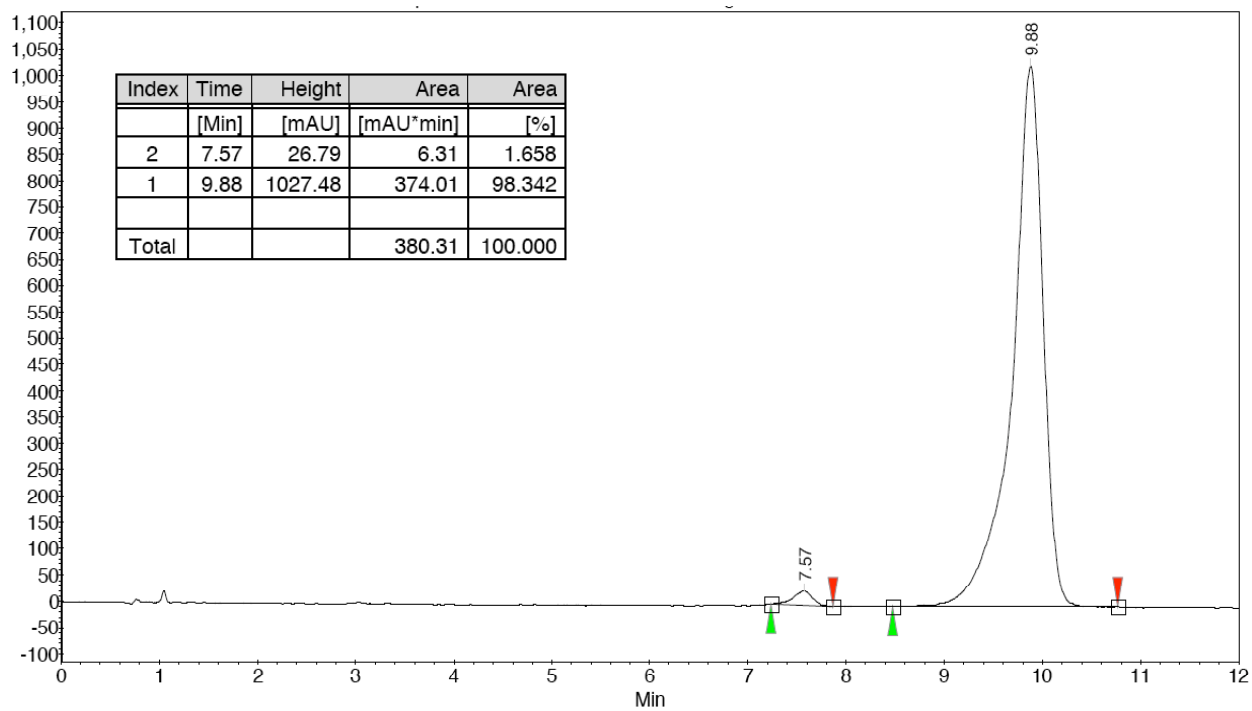

Racemate: ChiralPak AS-H, 20%MeOH/CO<sub>2</sub>, 220 nm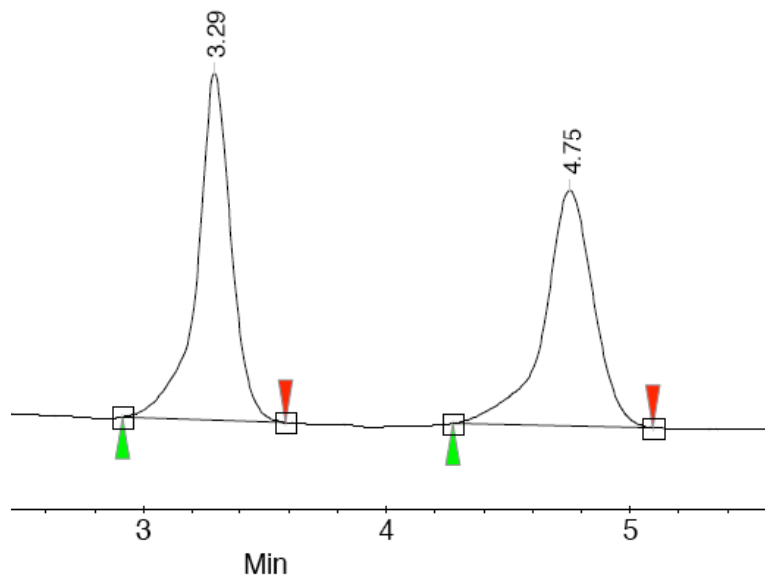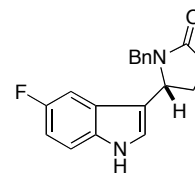

94% ee

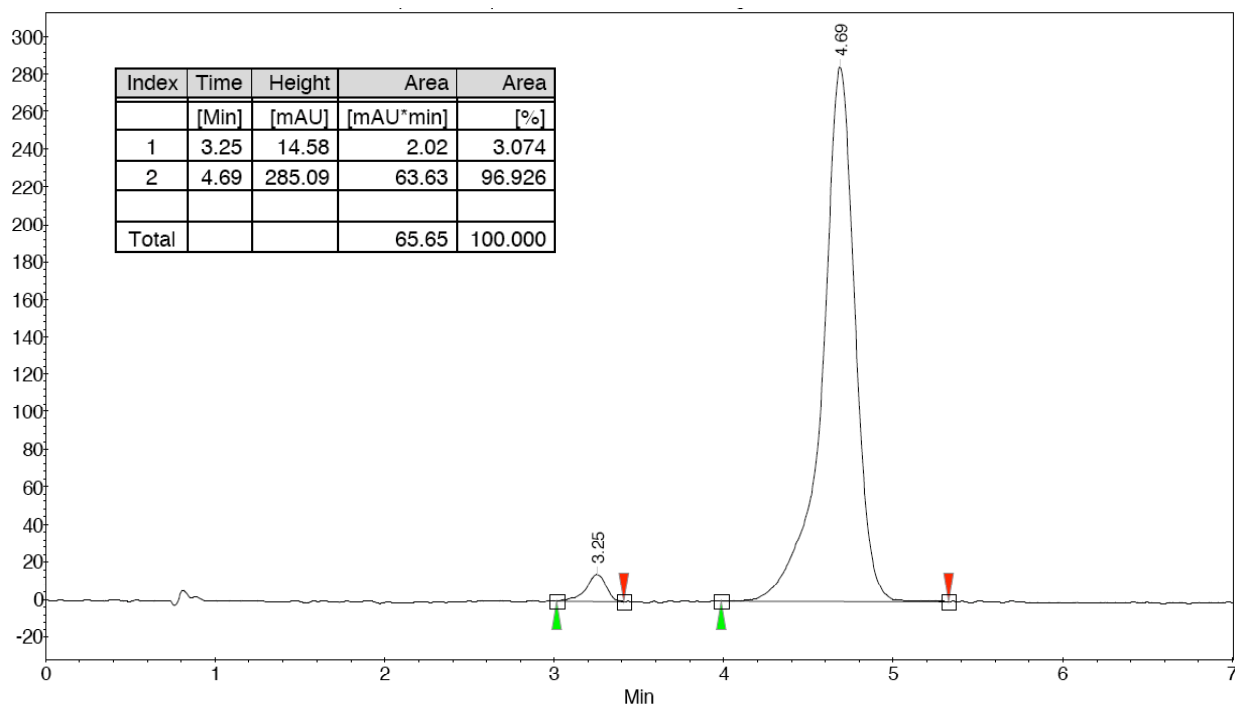

Racemate: ChiralPak AS-H, 20%MeOH/CO<sub>2</sub> 220 nm

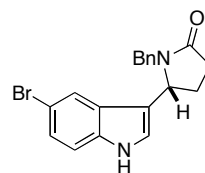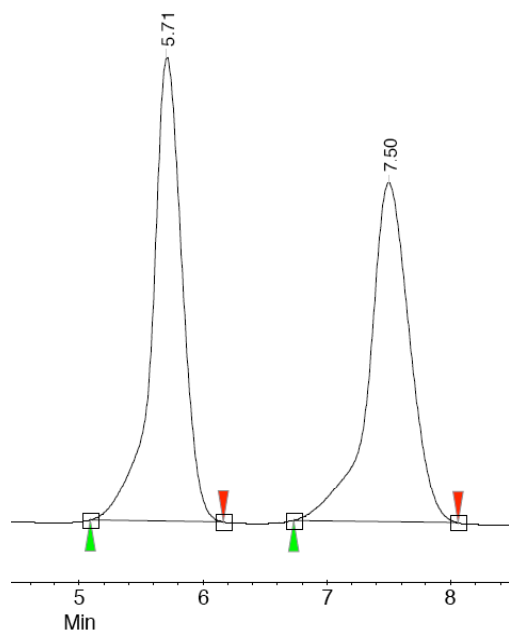

| Index | Time  | Height  | Area      | Area    |
|-------|-------|---------|-----------|---------|
|       | [Min] | [mAU]   | [mAU*min] | [%]     |
| 1     | 5.71  | 1195.10 | 337.53    | 50.195  |
| 2     | 7.50  | 872.85  | 334.91    | 49.805  |
| Total |       |         | 672.44    | 100.000 |

93% ee

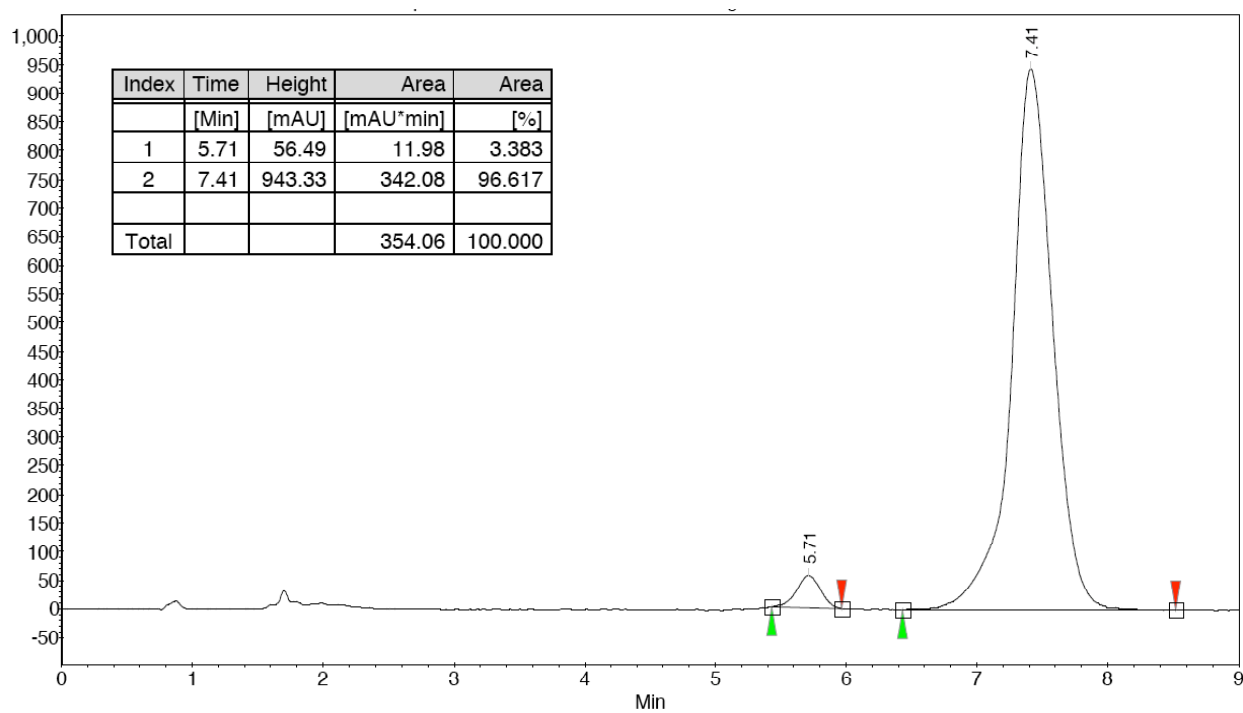

Racemate: ChiralPak AS-H, 20%MeOH/CO<sub>2</sub>, 220 nm

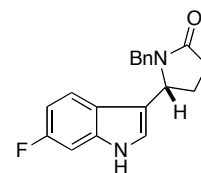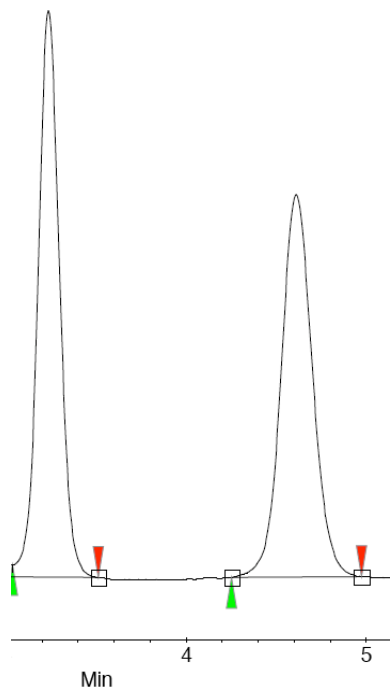

| Time  | End   | RT Offset | Quantity | Height     | Area           | Area    |
|-------|-------|-----------|----------|------------|----------------|---------|
| [Min] | [Min] | [Min]     | [% Area] | [ $\mu$ V] | [ $\mu$ V.Min] | [%]     |
| 3.23  | 3.51  | 0.00      | 50.48    | 515.2      | 71.5           | 50.478  |
| 4.61  | 4.97  | 0.00      | 49.52    | 347.8      | 70.2           | 49.522  |
|       |       |           | 100.00   | 863.1      | 141.7          | 100.000 |

96% ee

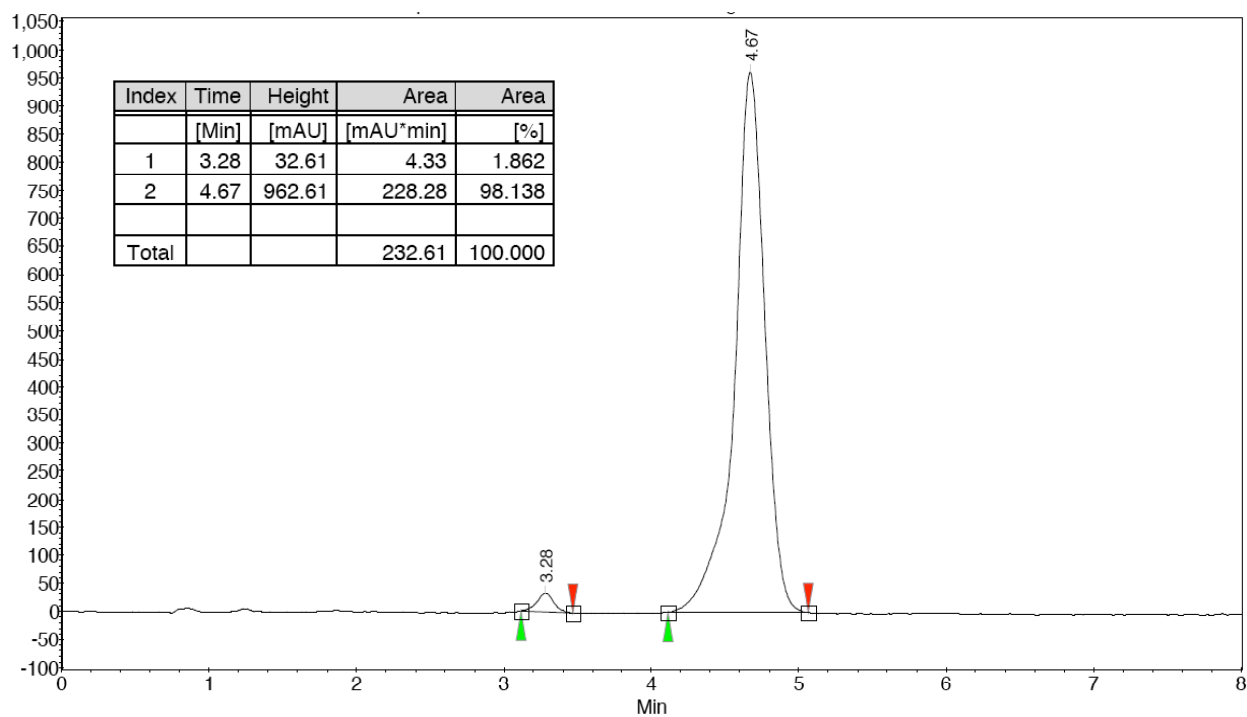



Racemate: ChiralPak AS-H, 20%MeOH/CO<sub>2</sub> 220 nm

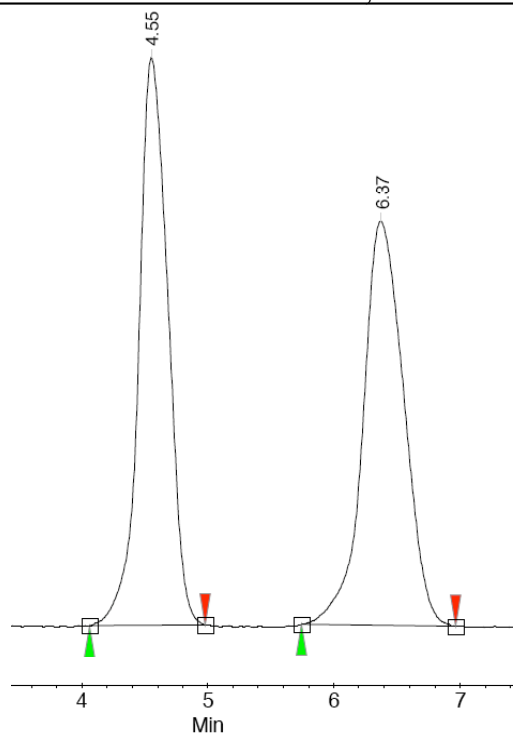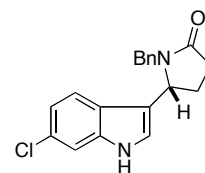

| Index | Time<br>[Min] | Height<br>[mAU] | Area<br>[mAU*min] | Area<br>[%] |
|-------|---------------|-----------------|-------------------|-------------|
| 1     | 4.55          | 549.55          | 147.39            | 50.064      |
| 2     | 6.37          | 391.19          | 147.01            | 49.936      |
| Total |               |                 | 294.41            | 100.000     |

96% ee

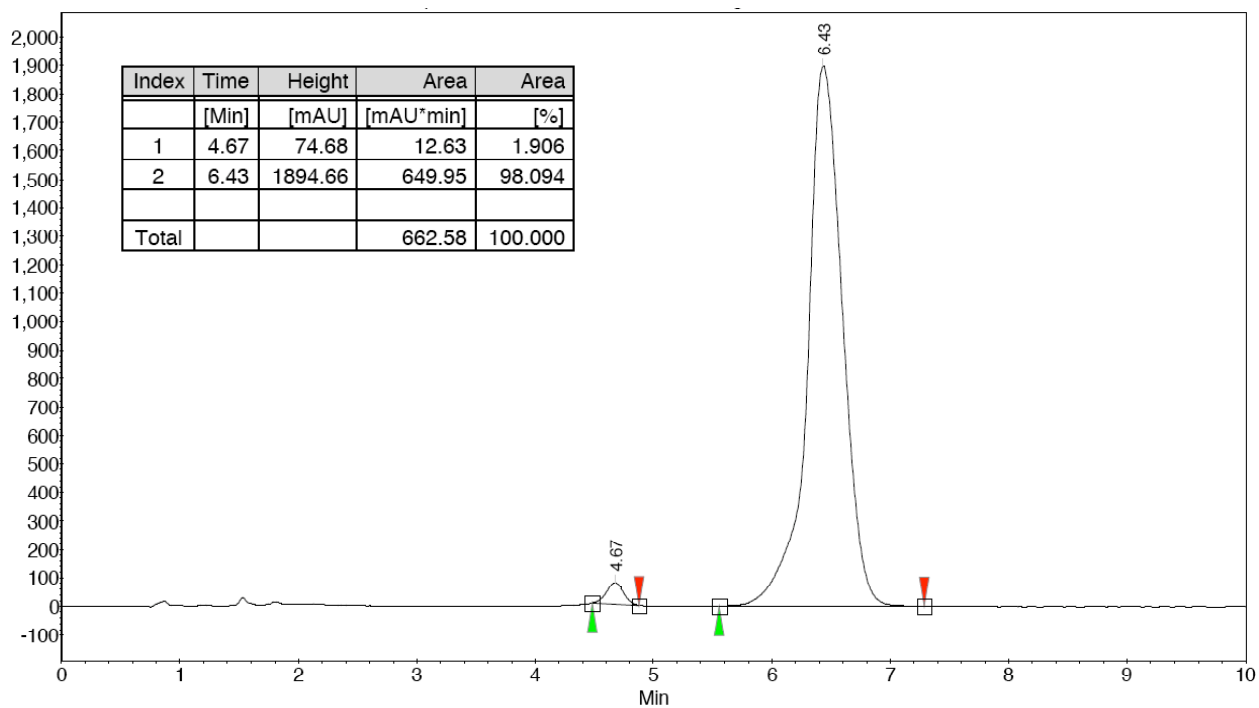

Racemate: ChiralPak AS-H, 20%MeOH/CO<sub>2</sub>, 220 nm

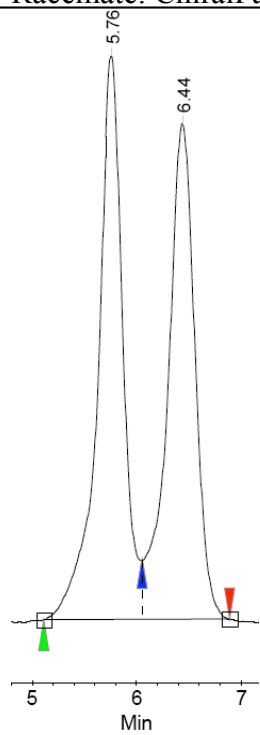

85%ee

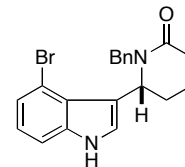

| Index | Time  | Height | Area      | Area    |
|-------|-------|--------|-----------|---------|
|       | [Min] | [mAU]  | [mAU*min] | [%]     |
| 1     | 5.76  | 257.49 | 72.51     | 51.483  |
| 2     | 6.44  | 226.50 | 68.33     | 48.517  |
| Total |       |        | 140.85    | 100.000 |

| Index | Time  | Height | Area      | Area    |
|-------|-------|--------|-----------|---------|
|       | [Min] | [mAU]  | [mAU*min] | [%]     |
| 2     | 5.86  | 10.46  | 1.63      | 7.644   |
| 1     | 6.56  | 78.67  | 19.71     | 92.356  |
| Total |       |        | 21.34     | 100.000 |

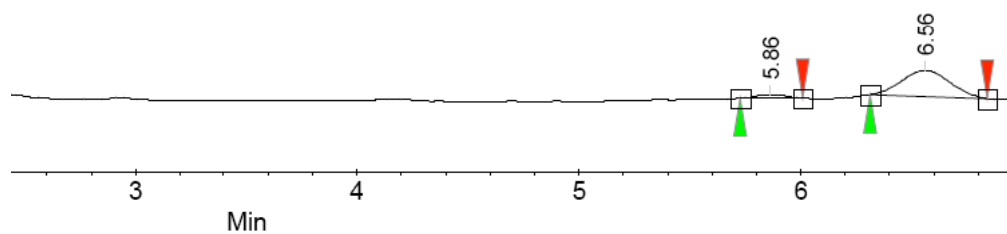

Racemate: Pirkle (*S,S*)-Whelk, 15%MeOH/CO<sub>2</sub> 220 nm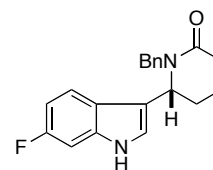

| Index | Time  | Height | Area      | Area    |
|-------|-------|--------|-----------|---------|
|       | [Min] | [mAU]  | [mAU*min] | [%]     |
| 2     | 6.29  | 85.06  | 19.04     | 49.103  |
| 1     | 8.20  | 65.71  | 19.73     | 50.897  |
| Total |       |        | 38.77     | 100.000 |

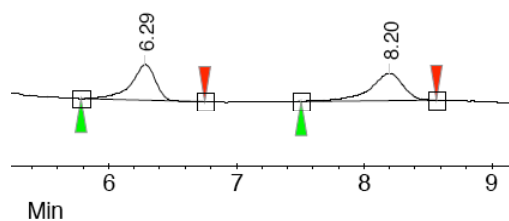

96% ee

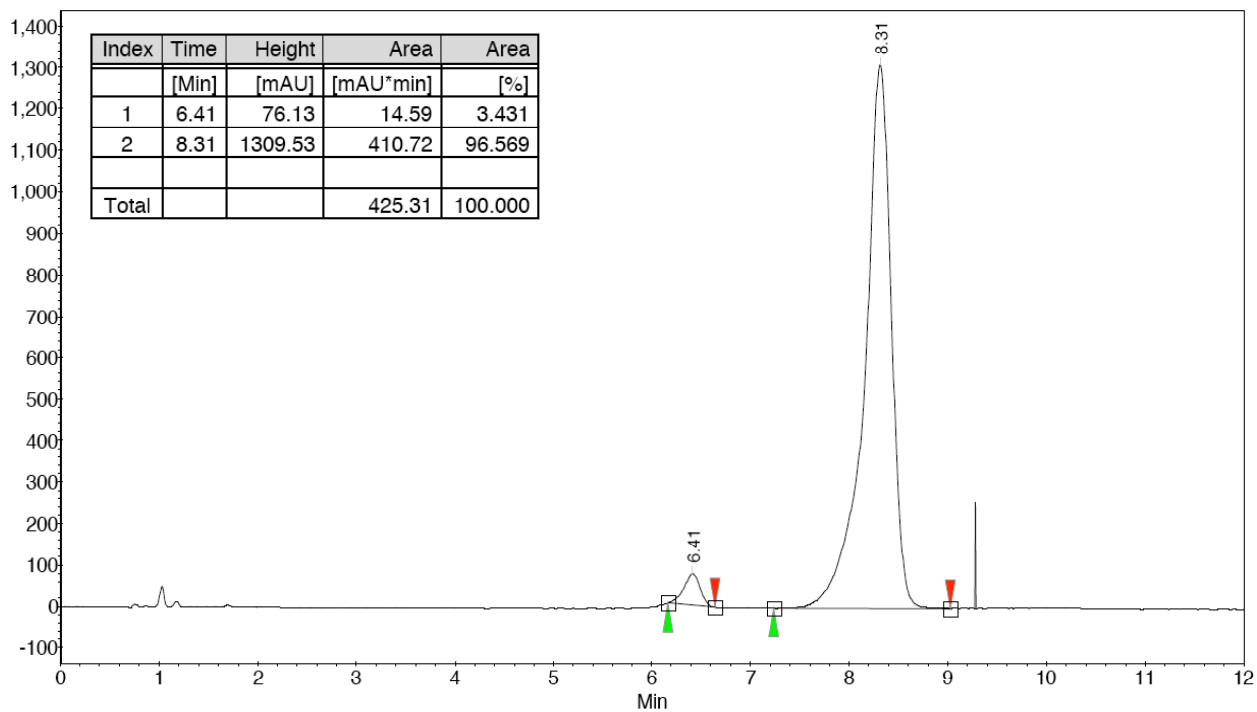

Racemate: Pirkle (*S,S*)-Whelk, 15%MeOH/CO<sub>2</sub>, 220 nm

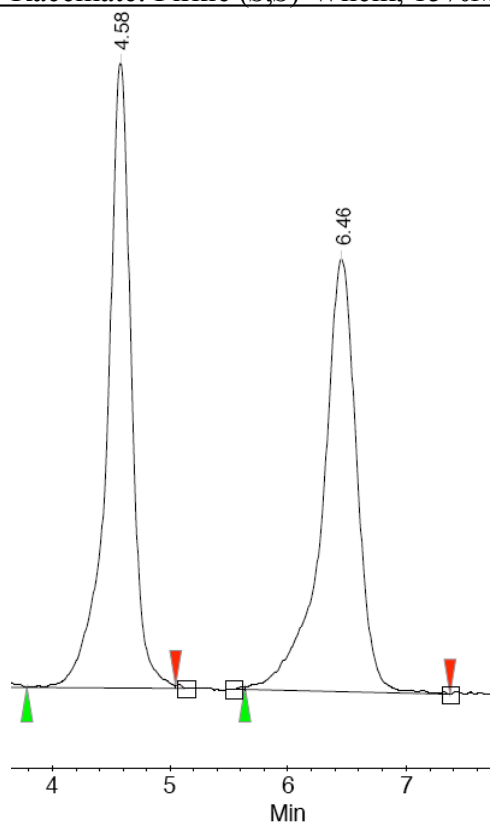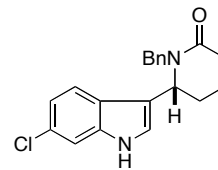

| Index | Time  | Height | Area      | Area    |
|-------|-------|--------|-----------|---------|
|       | [Min] | [mAU]  | [mAU*min] | [%]     |
| 1     | 4.58  | 237.05 | 56.28     | 50.147  |
| 2     | 6.46  | 164.10 | 55.95     | 49.853  |
| Total |       |        | 112.22    | 100.000 |

92% ee

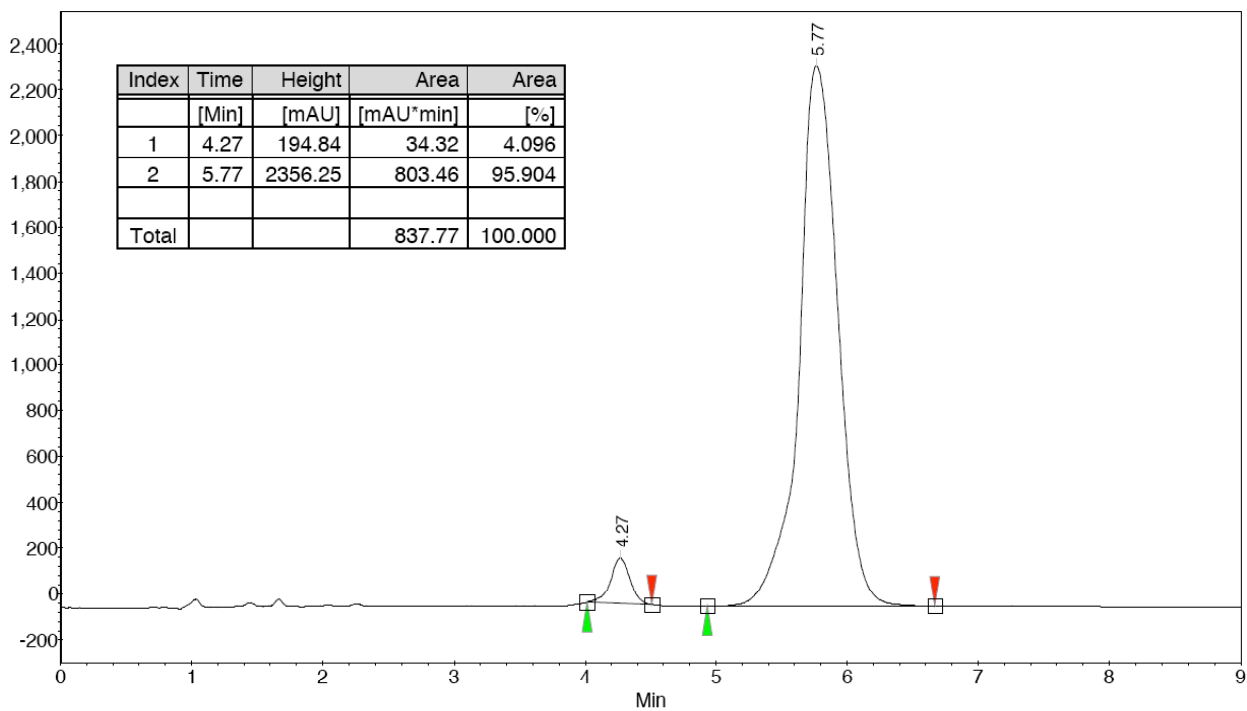

Racemate: ChiralPak AD-H, 20%MeOH/CO<sub>2</sub> 220 nm

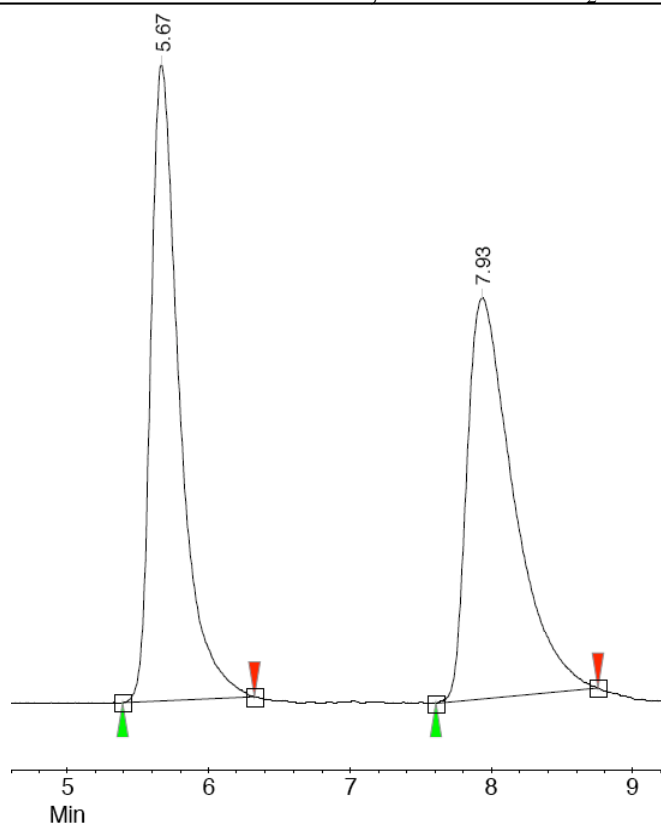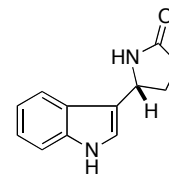

| Index | Time [Min] | Height [mAU] | Area [mAU*min] | Area [%] |
|-------|------------|--------------|----------------|----------|
| 1     | 5.67       | 525.08       | 123.88         | 49.595   |
| 2     | 7.93       | 331.23       | 125.90         | 50.405   |
| Total |            |              | 249.78         | 100.000  |

94% ee

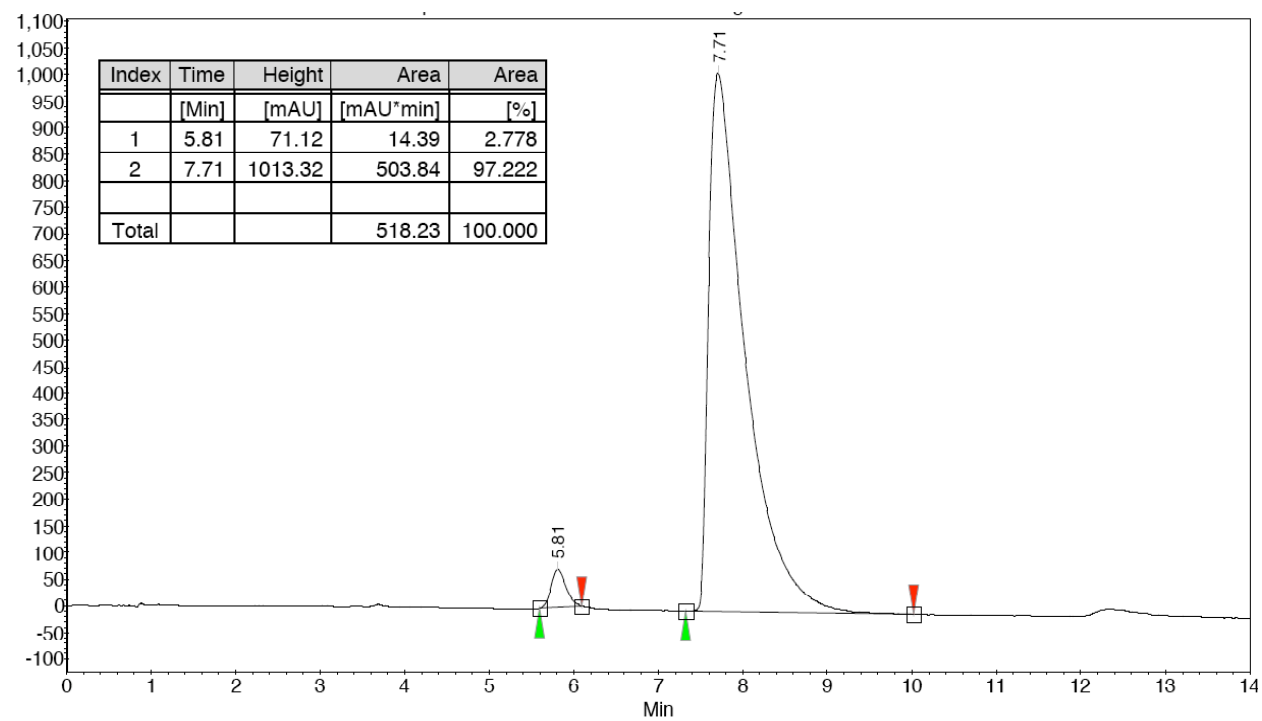

G.  $^1\text{H}$  and  $^{13}\text{C}$  NMR Spectra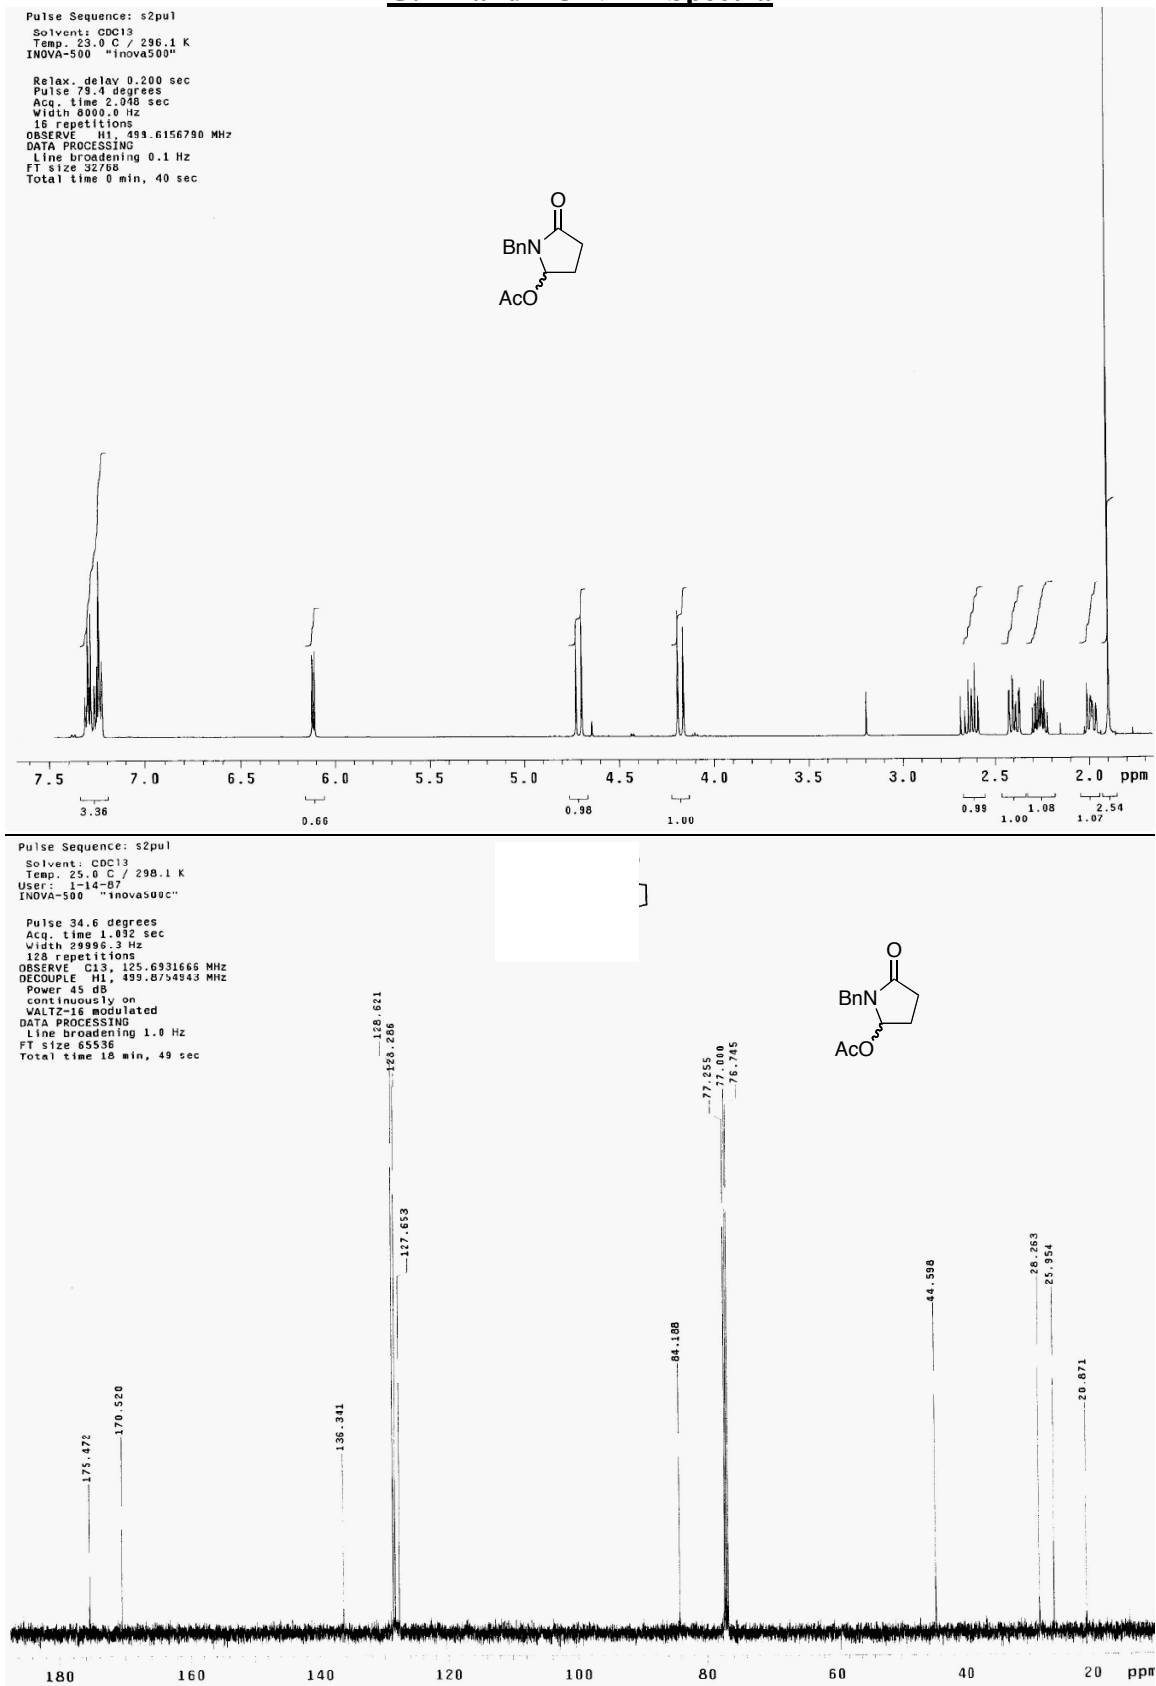

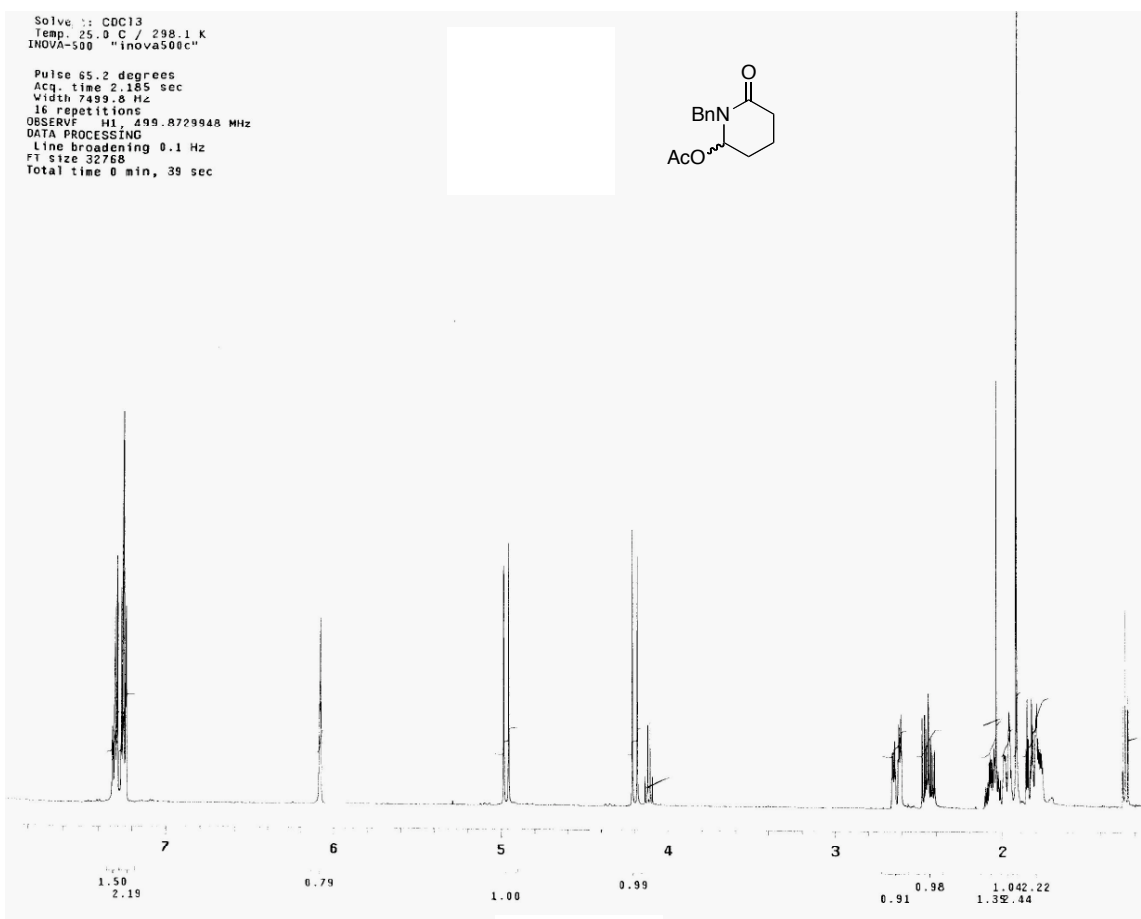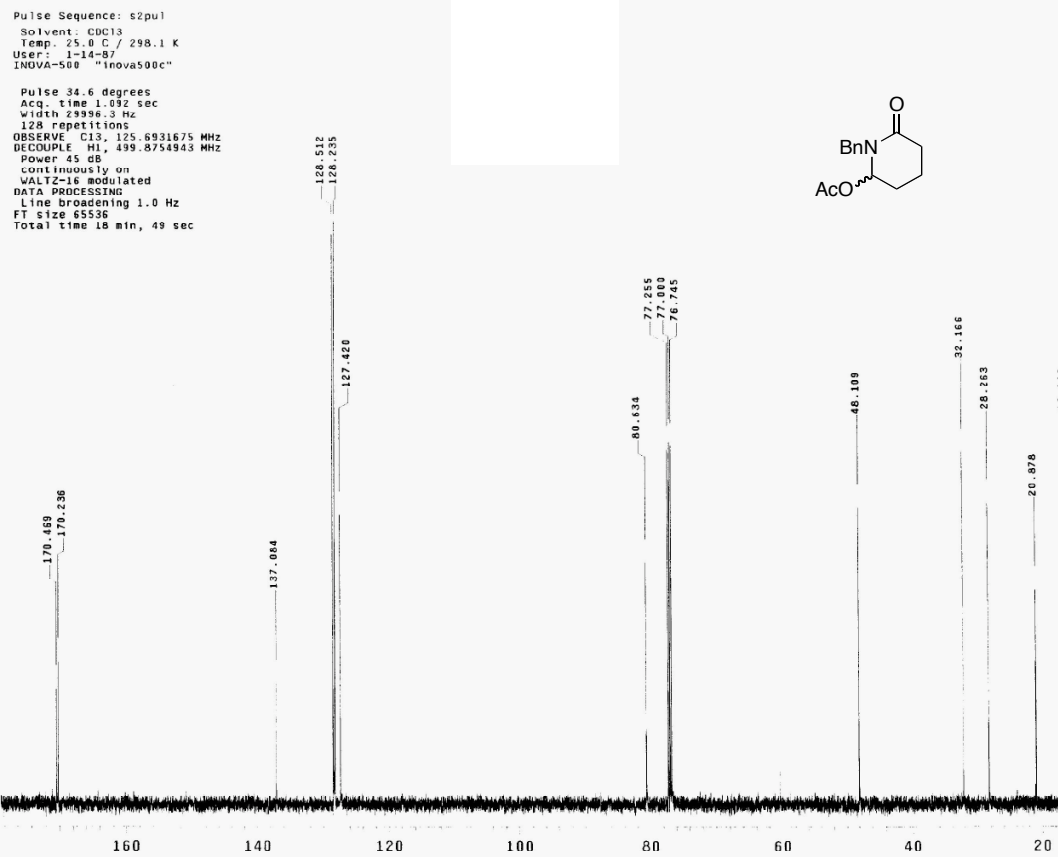

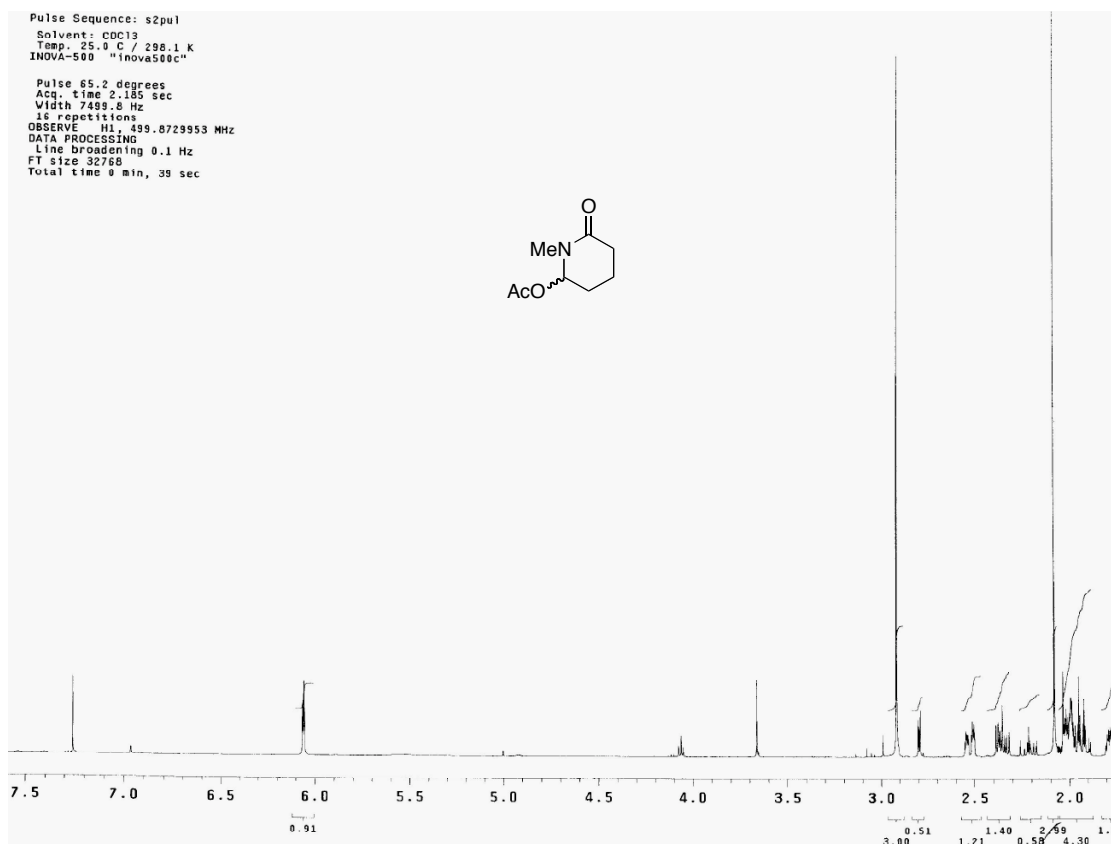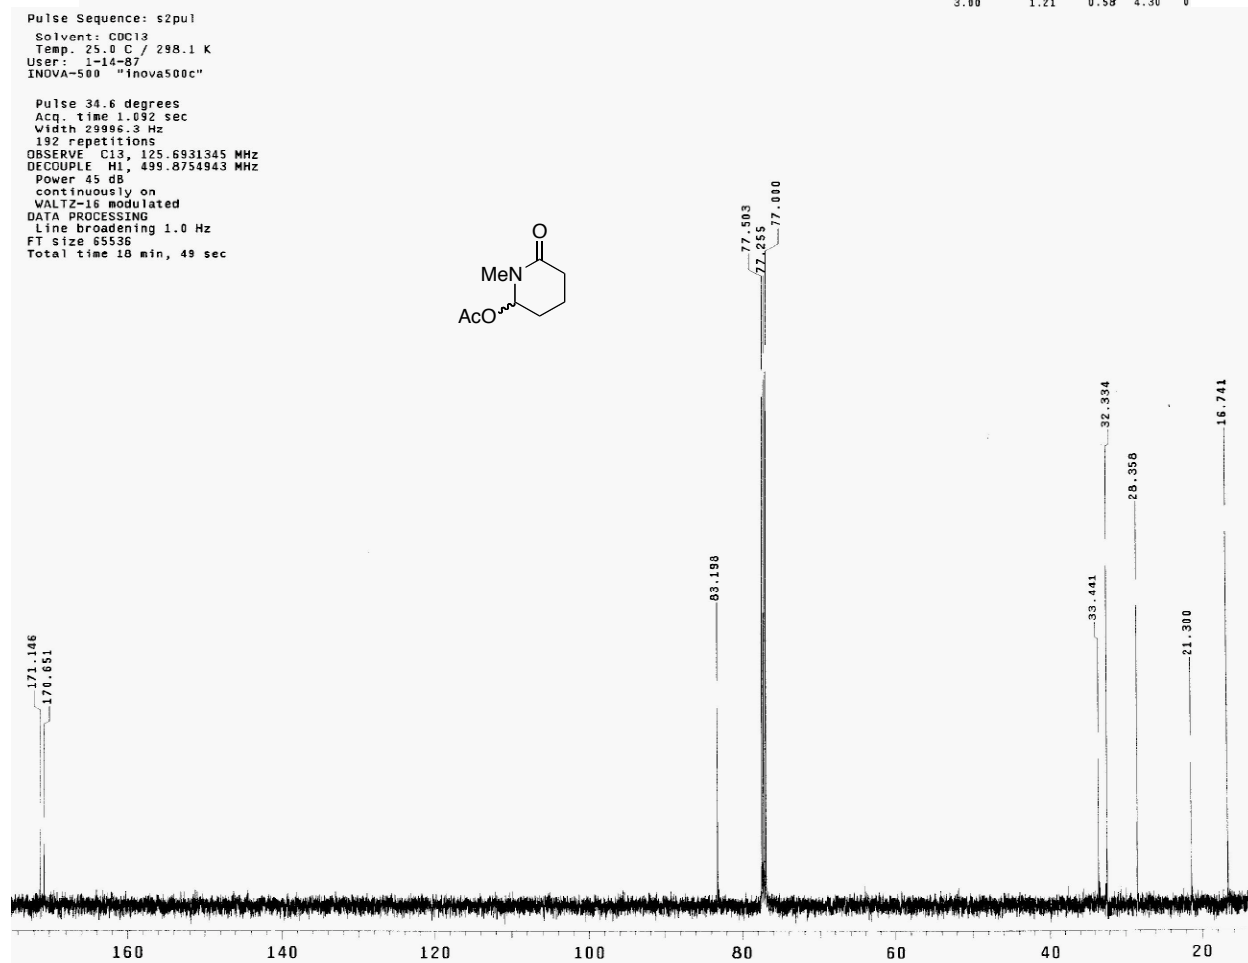



Data Collected on:  
 nmr5un2-inova500  
 Archive directory:  
 /export/home/ds2/vnmrsys/data  
 Sample directory:  
 File: eap-V-304trit  
 Pulse Sequence: s2pul  
 Solvent: DMSO  
 Temp. 23.0 C / 296.1 K  
 Relax. delay 0.200 sec  
 Pulse 45.7 degrees  
 Acq. time 2.046 sec  
 Width 8000.0 Hz  
 16 repetitions  
 OBSERVE H1, 499.6180219 MHz  
 DATA PROCESSING  
 Line broadening 0.1 Hz  
 FT size 32768  
 Total time 0 min

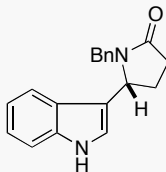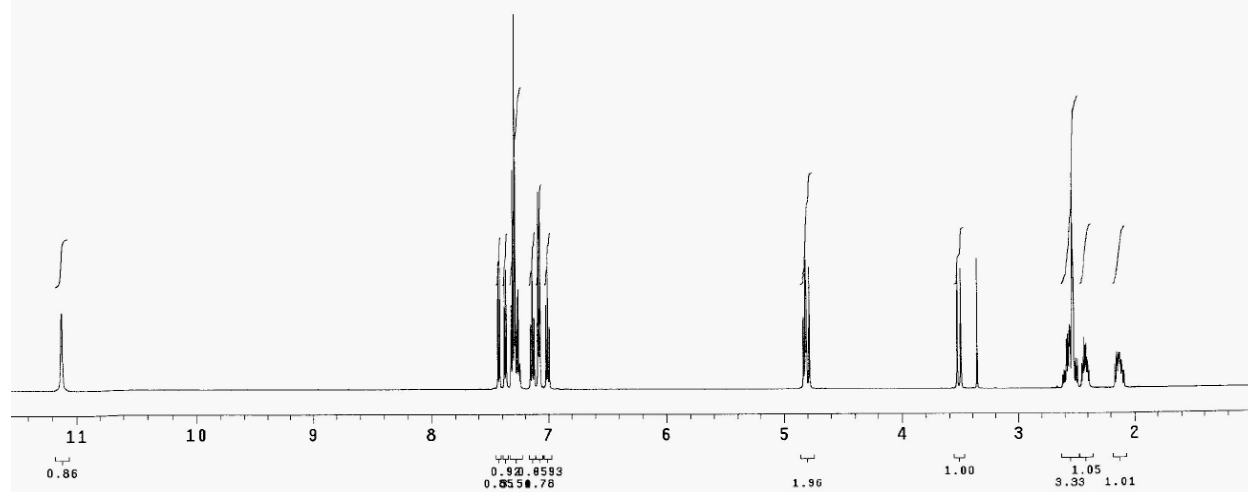

Pulse Sequence: s2pul  
 Solvent: DMSO  
 Temp. 25.0 C / 298.1 K  
 User: j-14-87  
 INOVA-500 "inova500c"  
 Pulse 34.5 degrees  
 Acq. time 1.892 sec  
 Width 29996.3 Hz  
 1152 repetitions  
 OBSERVE C13, 125.6938225 MHz  
 DECOUPLE H1, 499.8778587 MHz  
 Power 45 dB  
 continuously on  
 WALTZ-16 modulated  
 DATA PROCESSING  
 Line broadening 1.0 Hz  
 FT size 65536  
 Total time 3 hr, 3 min, 35 sec

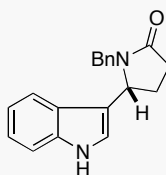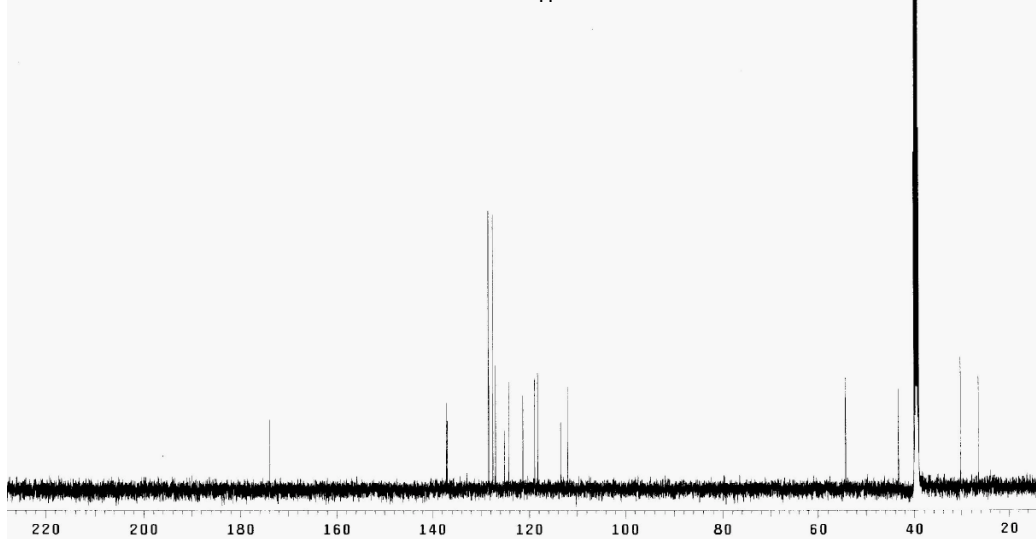

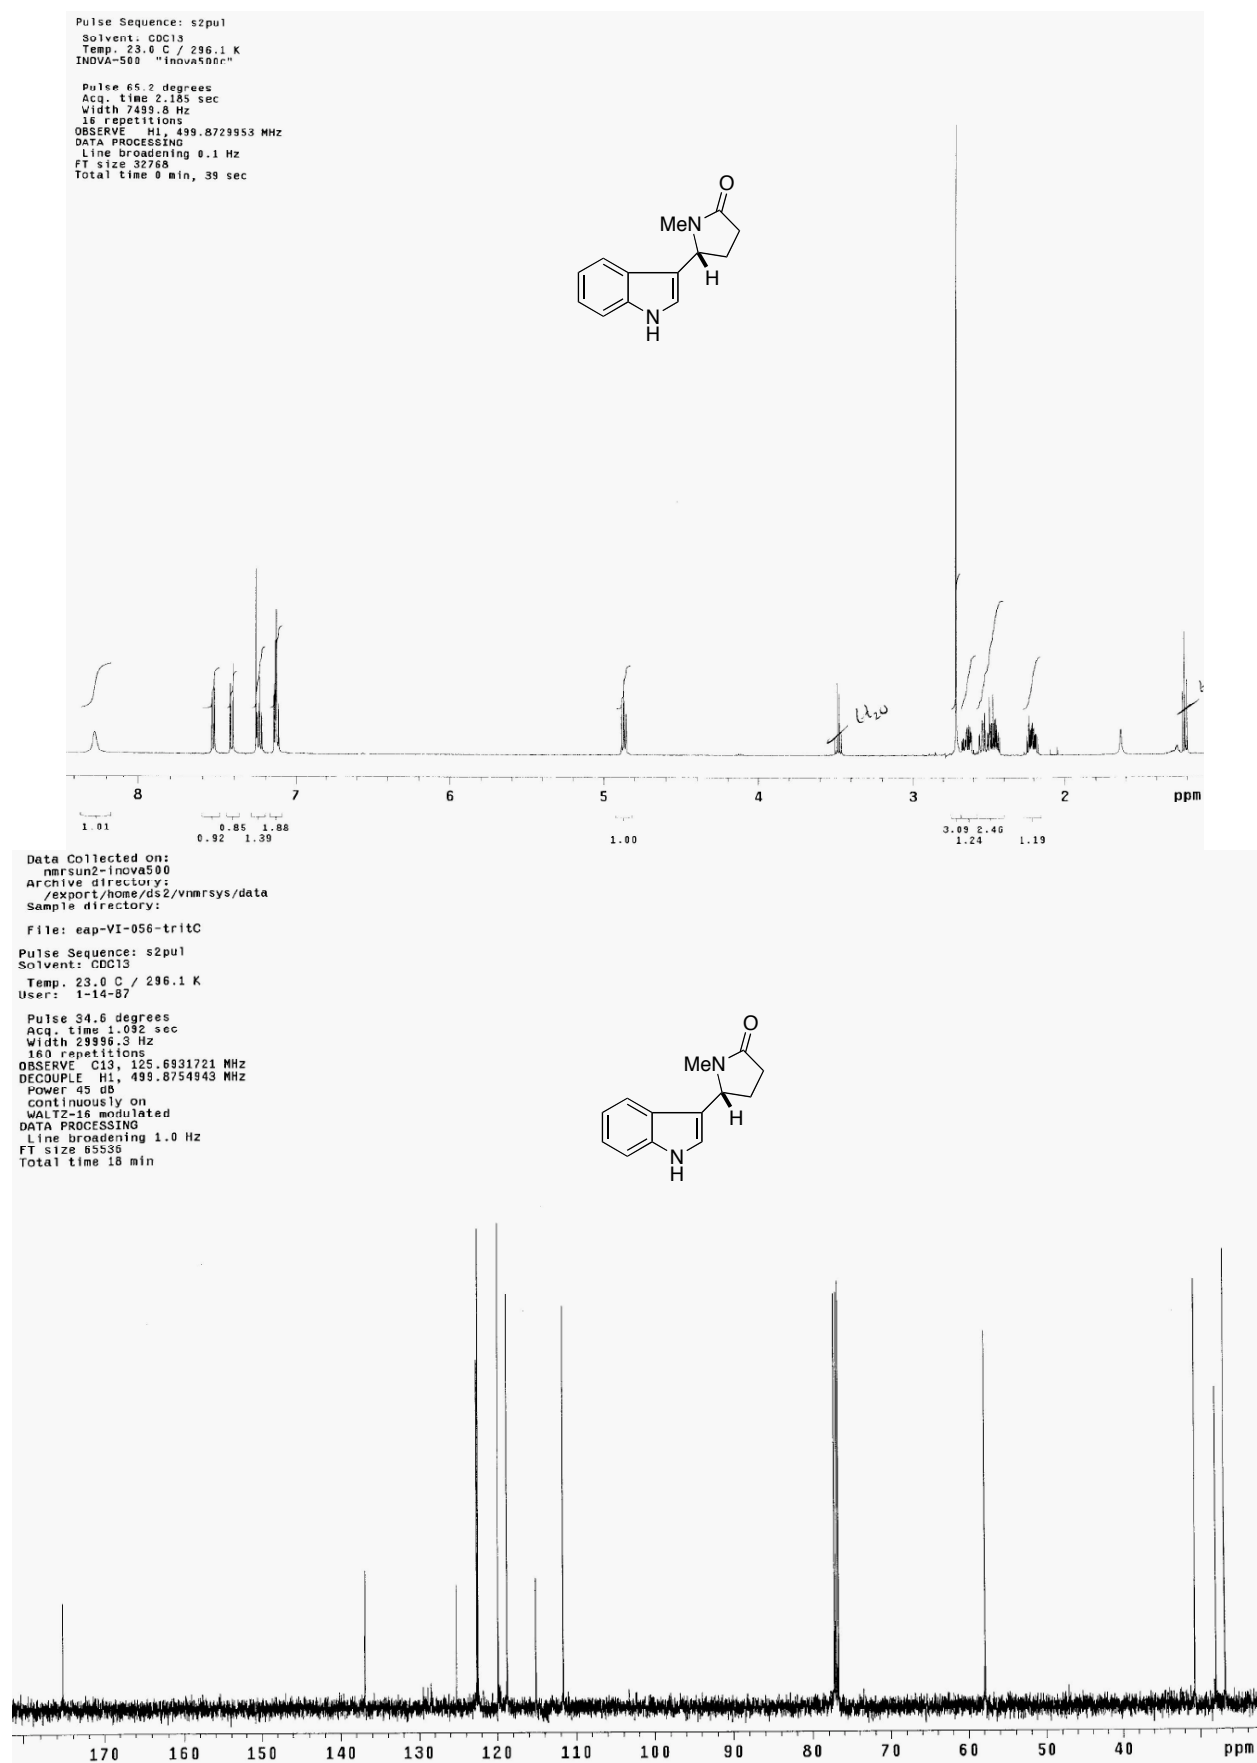

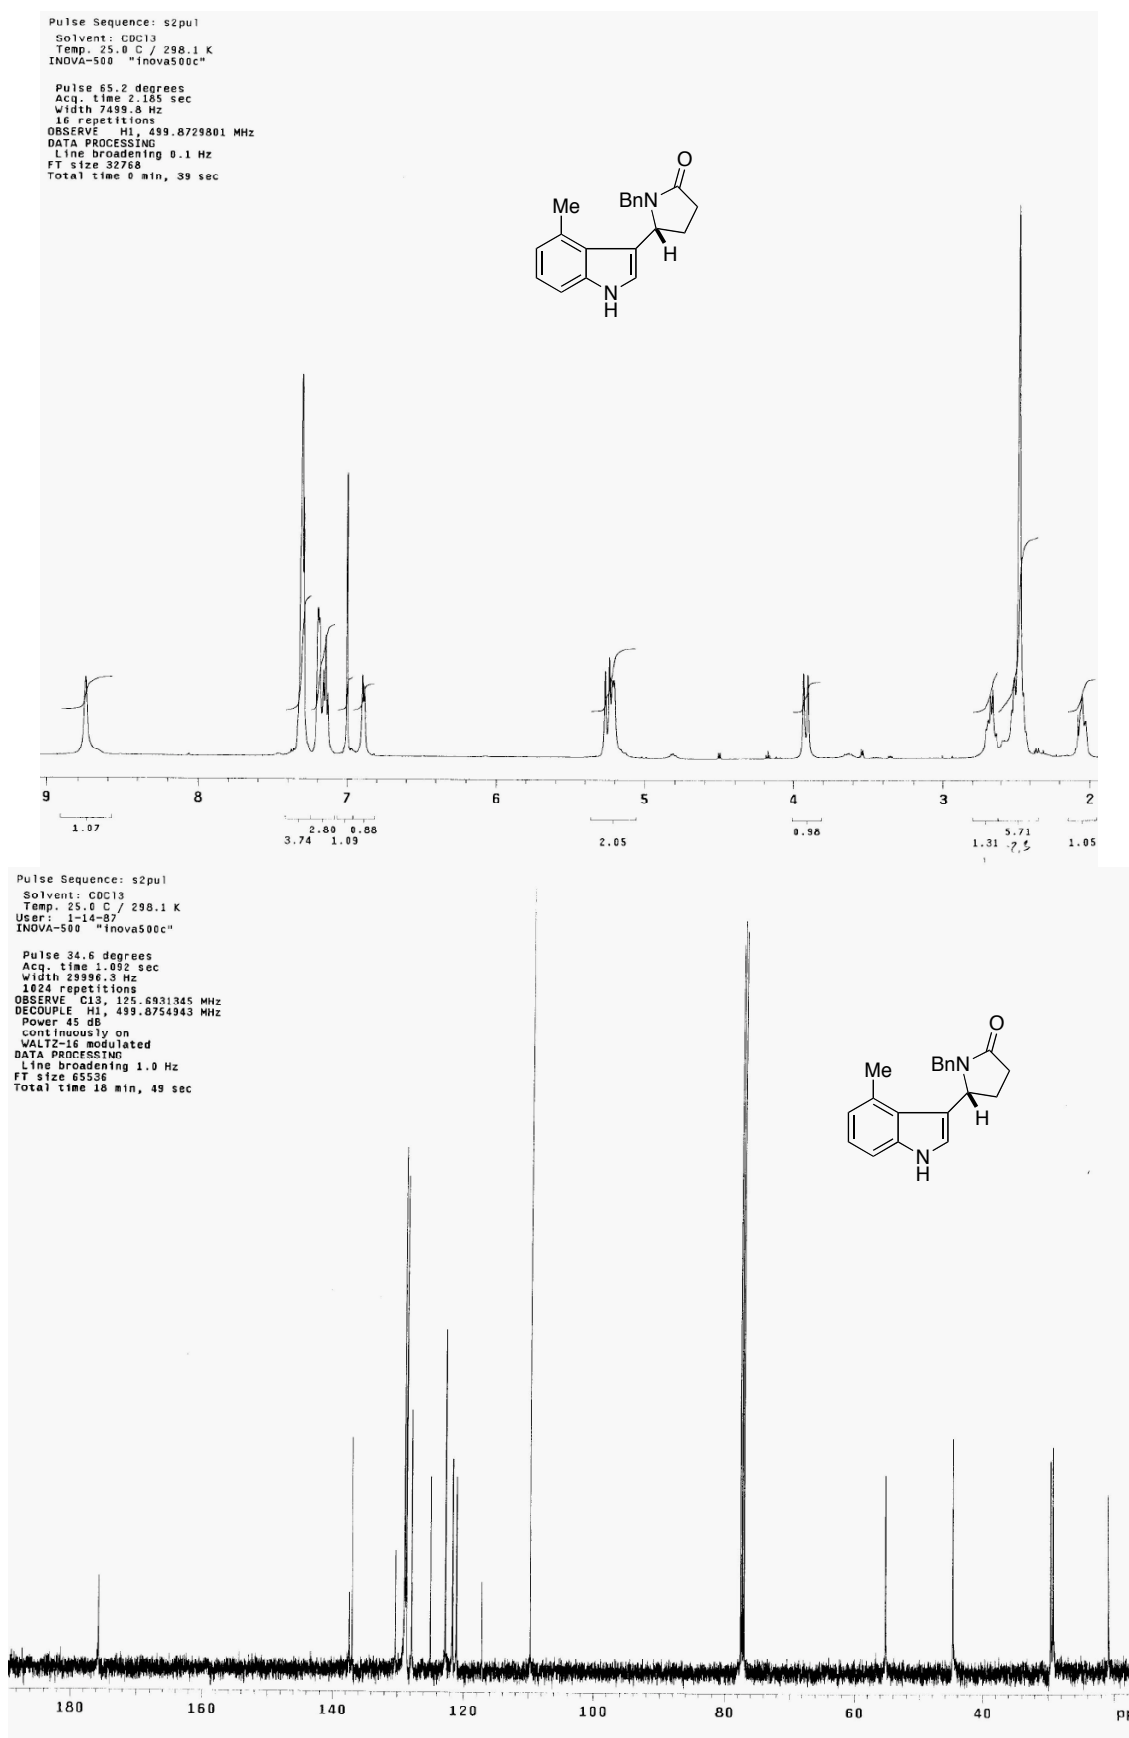

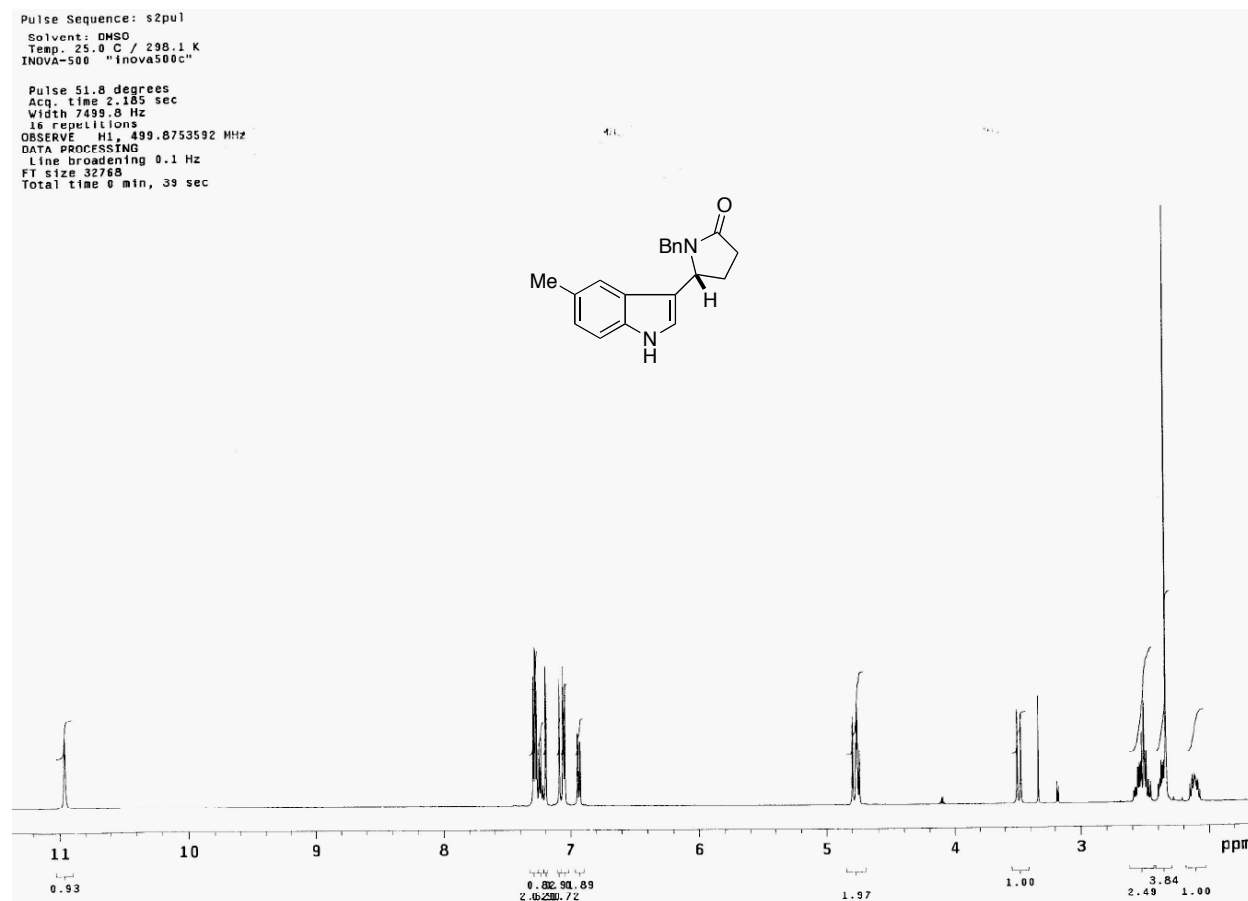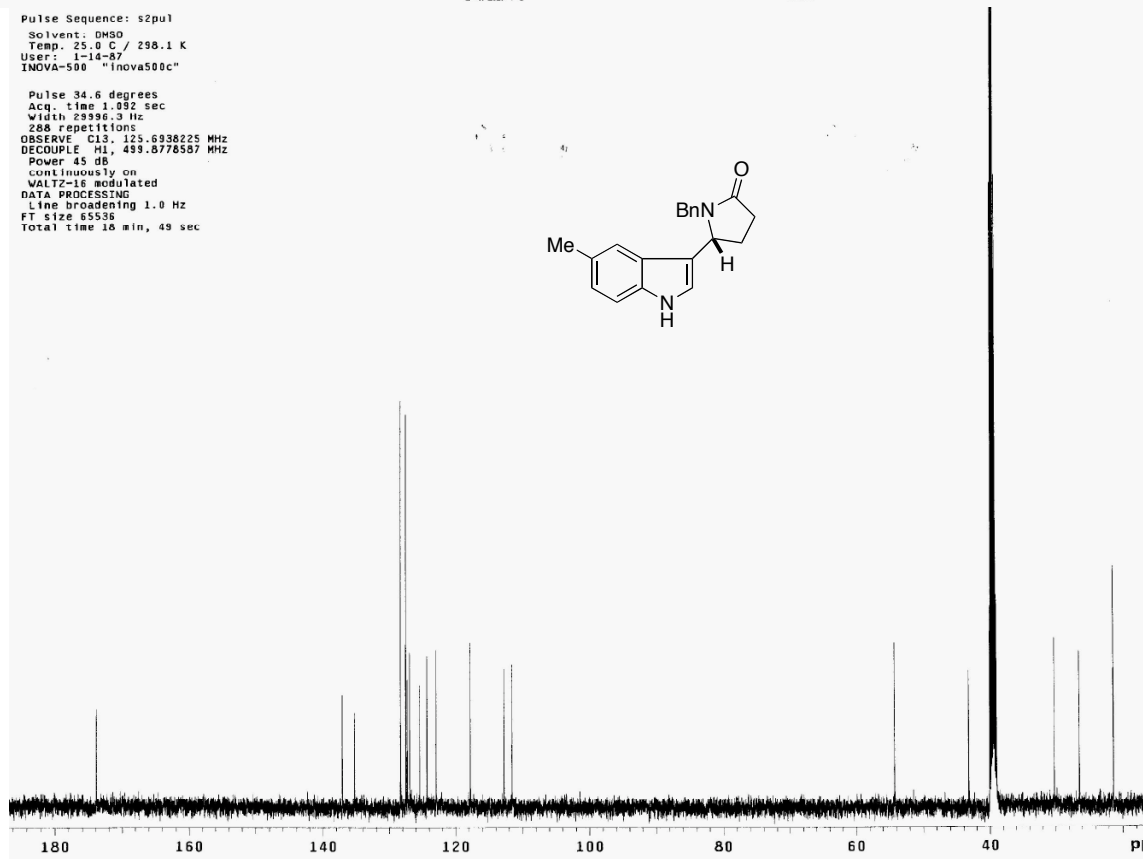

Pulse Sequence: s2pul  
Solvent: CDCl3  
Temp: 25.0 C / 298.1 K  
INOVA-500 "inova500c"

Pulse 65.2 degrees  
Acq. time 2.185 sec  
Width 7499.8 Hz  
16 repetitions  
OBSERVE H1, 499.8729948 MHz  
DATA PROCESSING  
Line broadening 0.1 Hz  
FT size 32768  
Total time 0 min, 39 sec

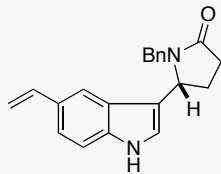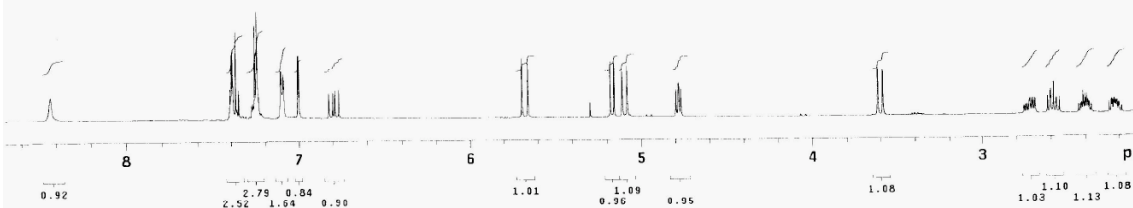

Pulse Sequence: s2pul  
Solvent: CDCl3  
Temp: 25.0 C / 298.1 K  
User: 1-14-87  
INOVA-500 "inova500c"

Pulse 34.6 degrees  
Acq. time 1.892 sec  
Width 29996.3 Hz  
384 repetitions  
OBSERVE C13, 125.6931675 MHz  
DECOUPLE H1, 499.8754943 MHz  
Power 45 dB  
continuously on  
WALTZ-16 modulated  
DATA PROCESSING  
Line broadening 1.0 Hz  
FT size 65536  
Total time 18 min, 49 sec

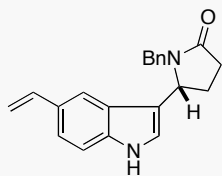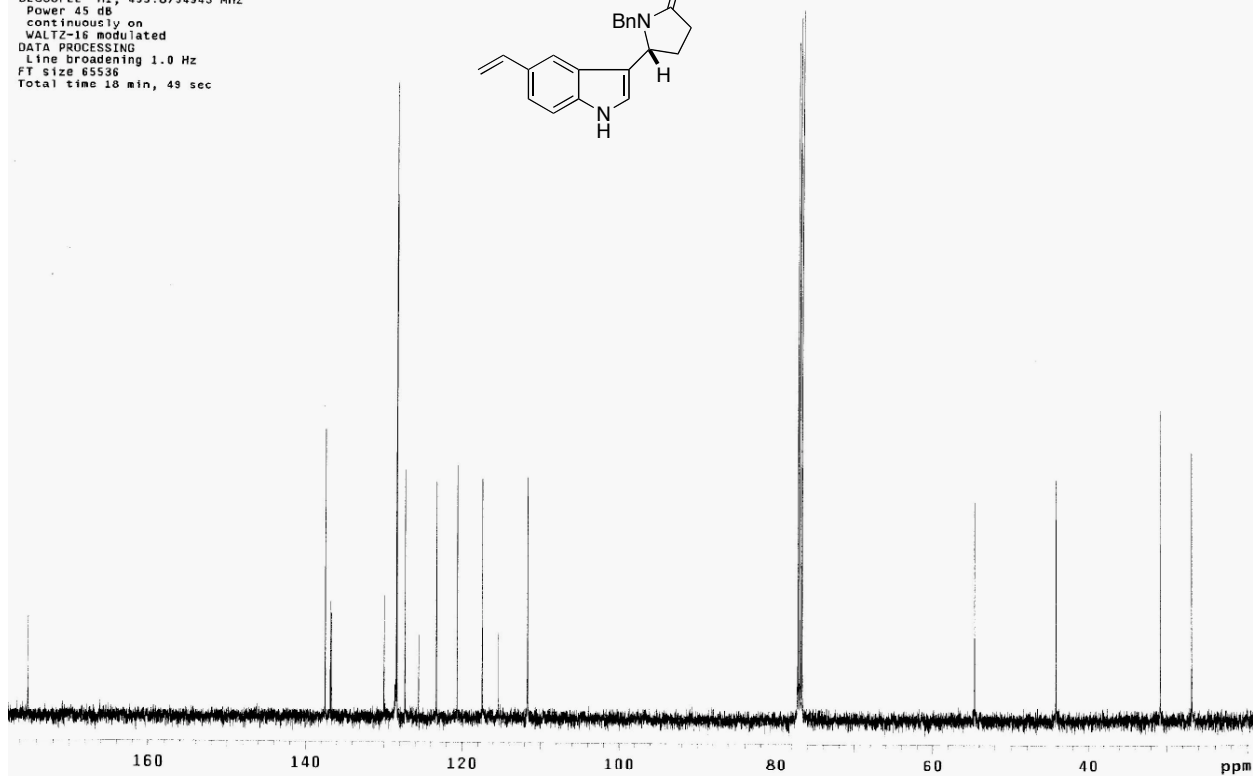

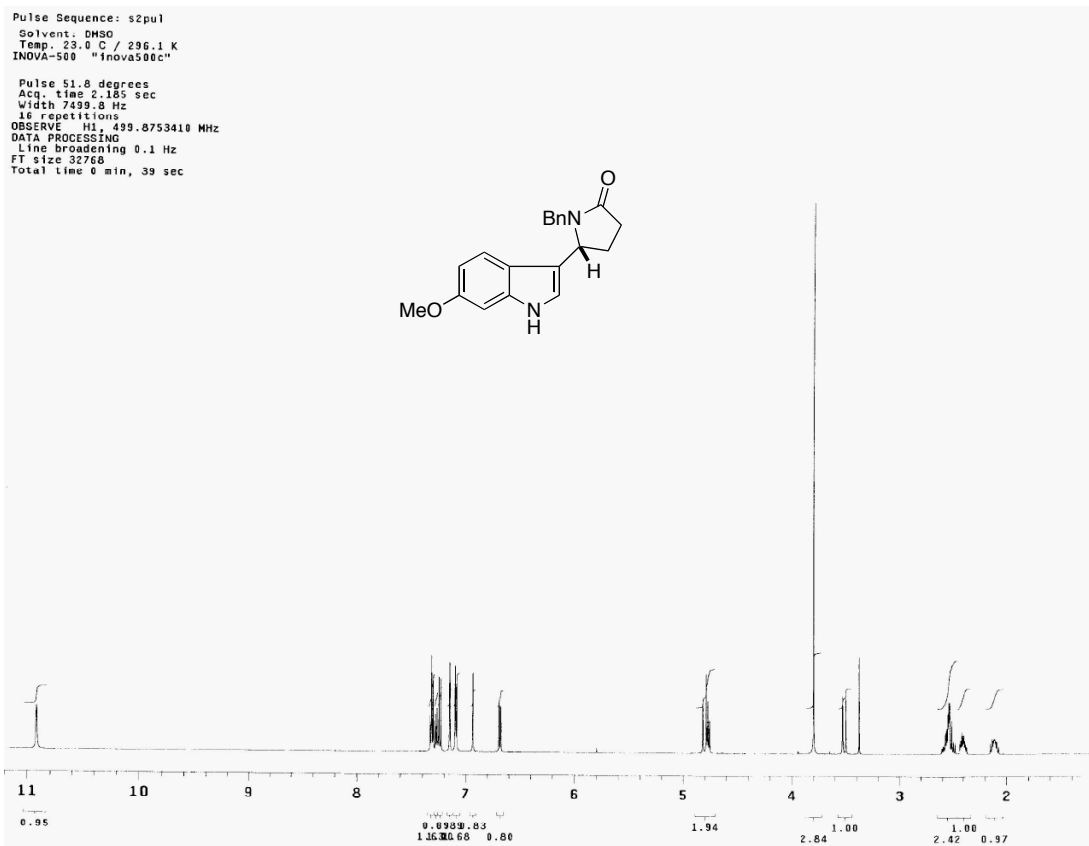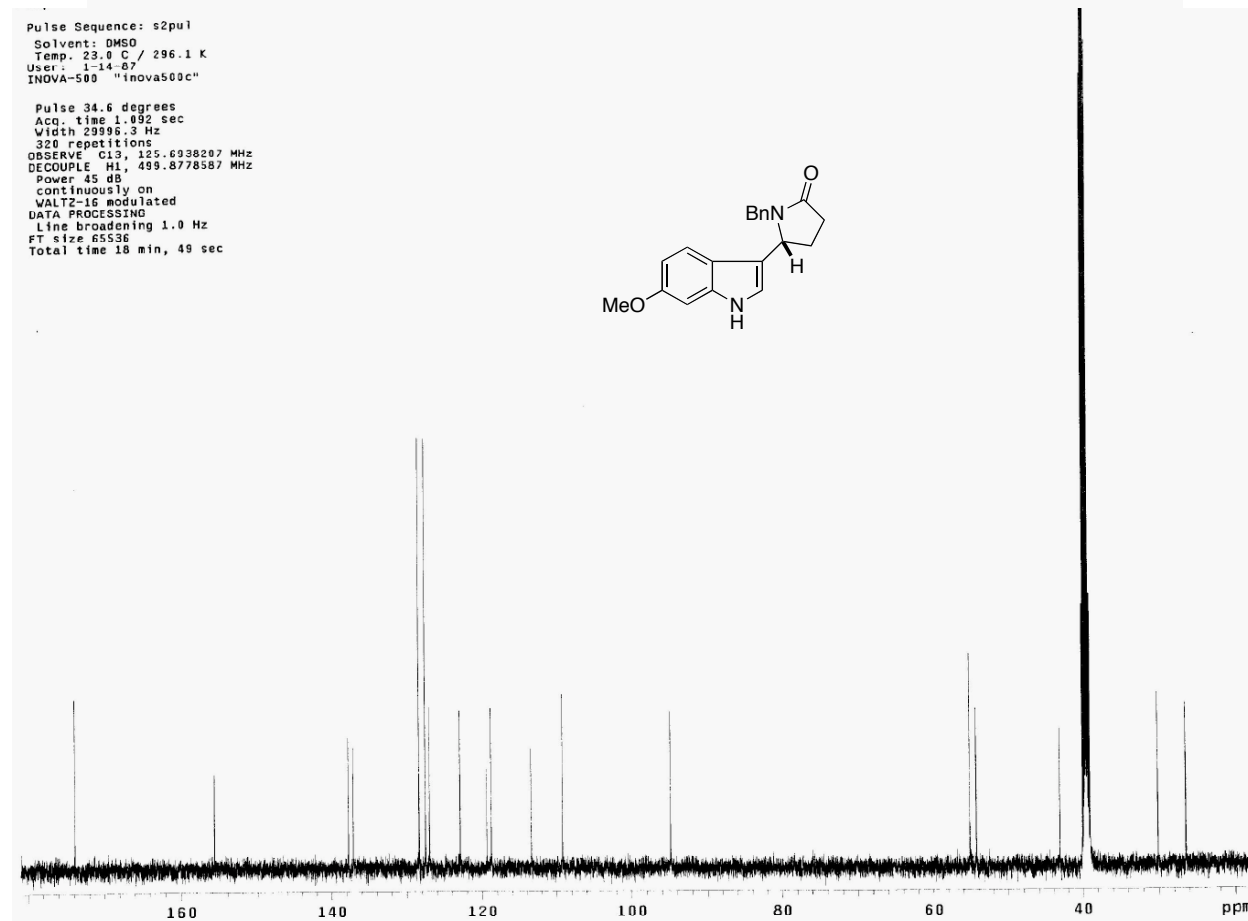

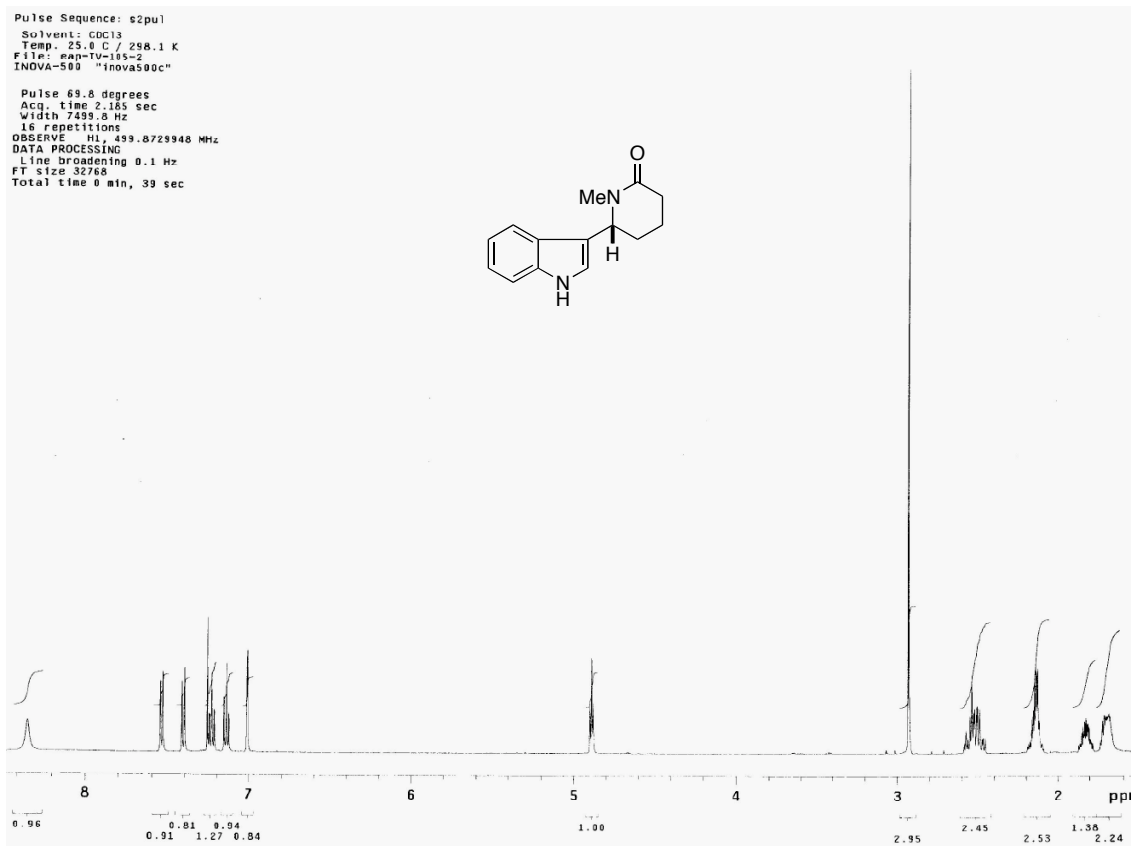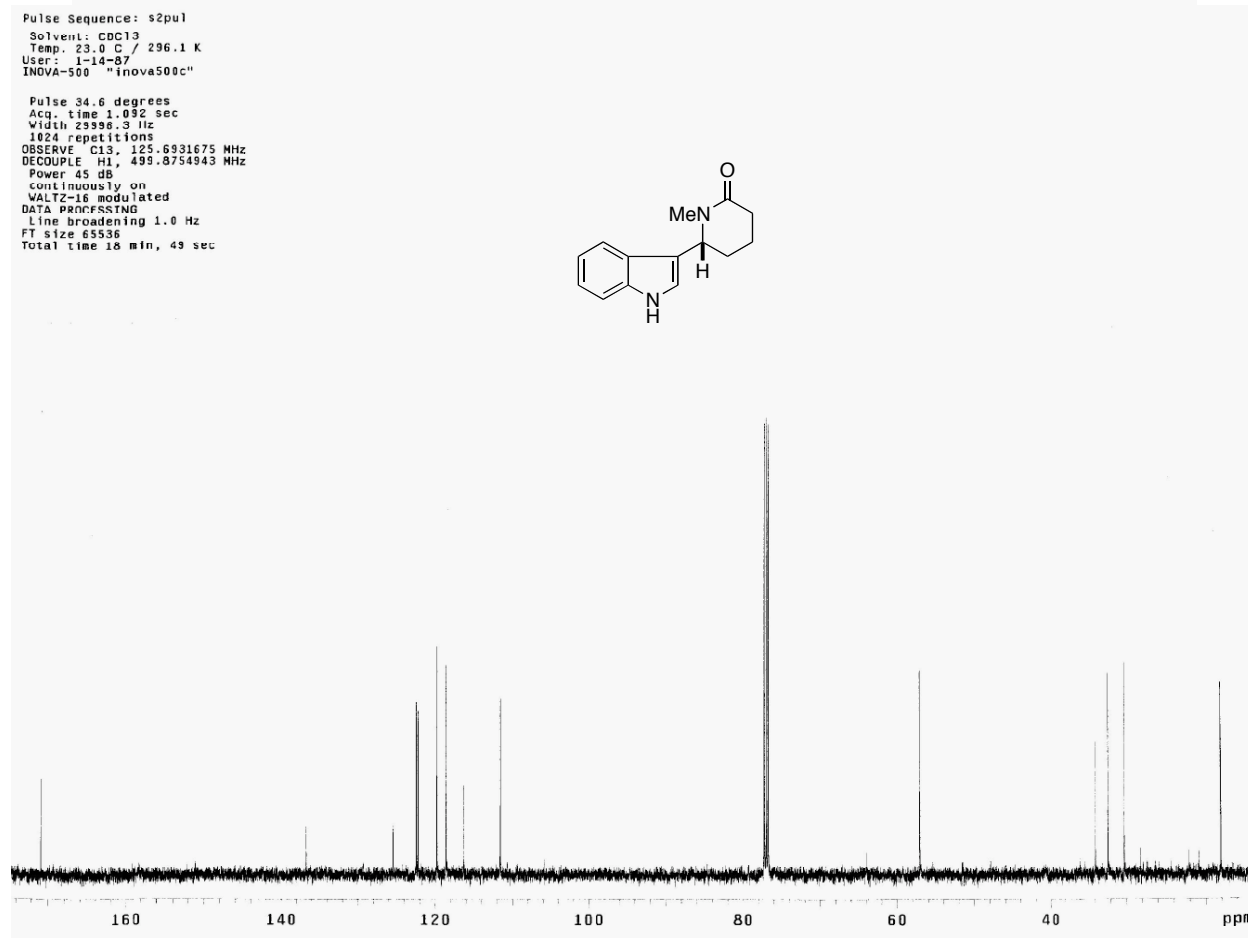

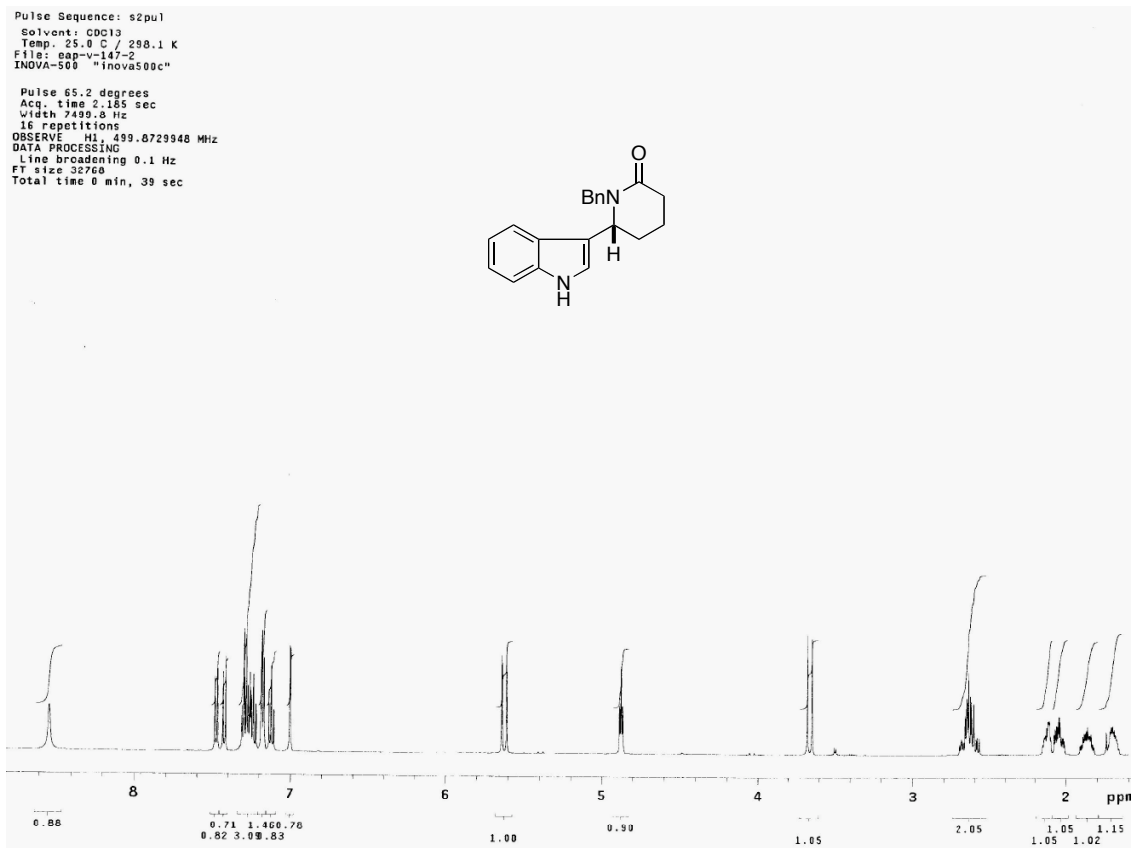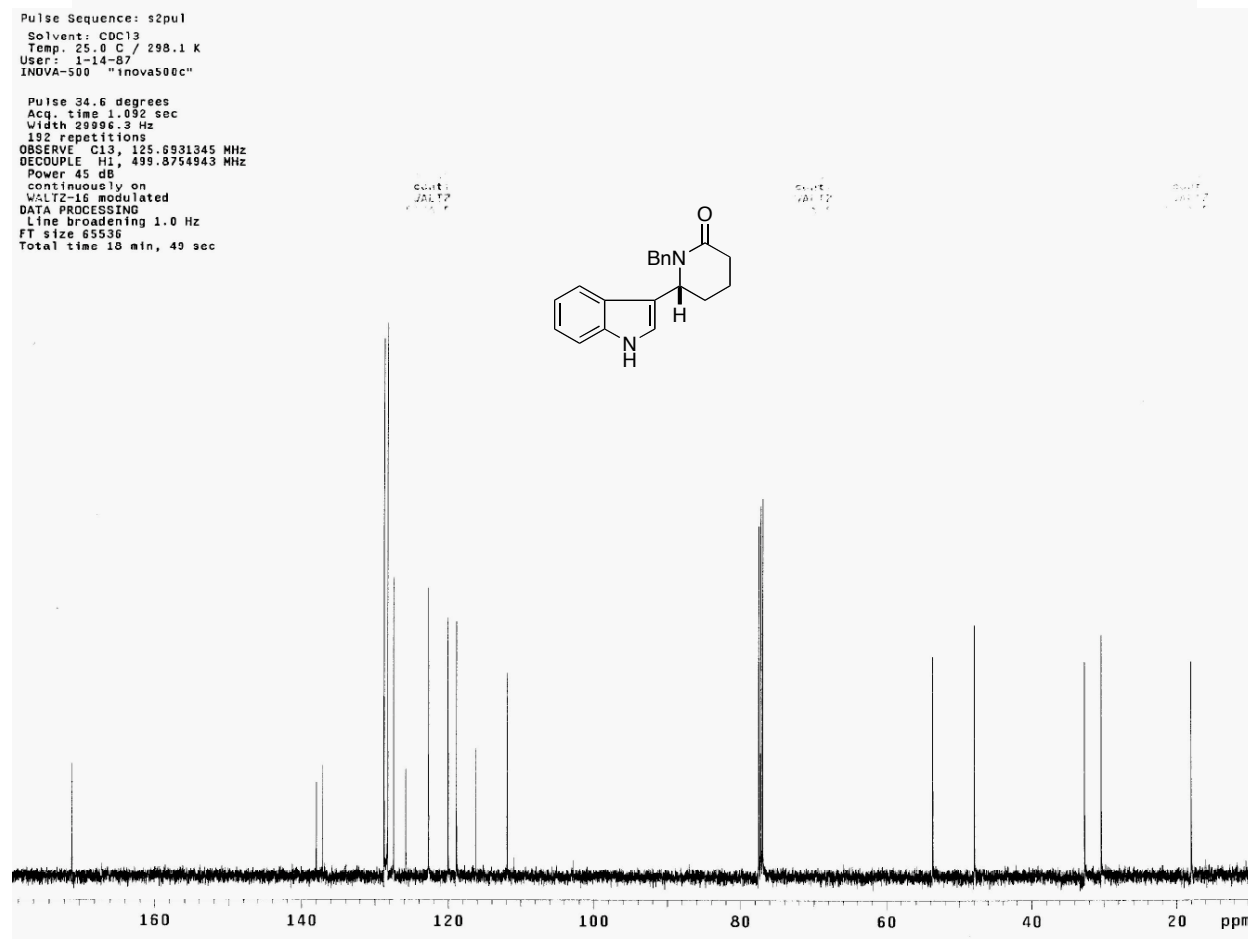



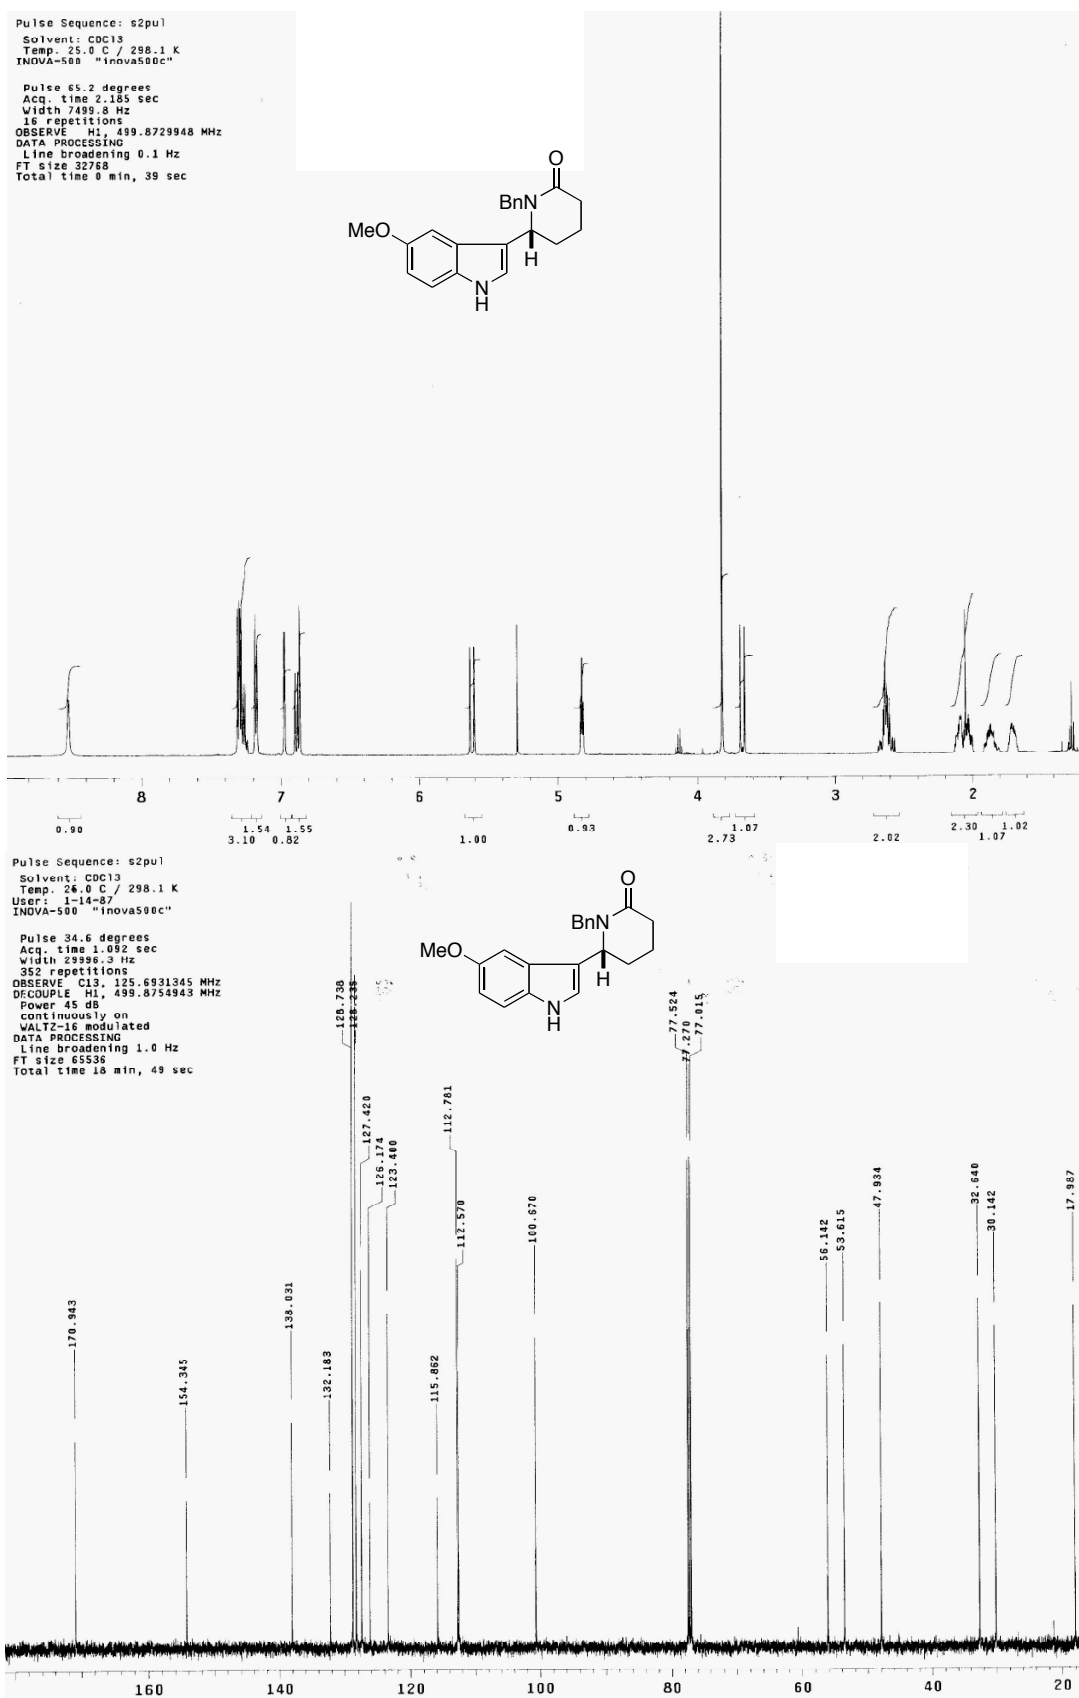

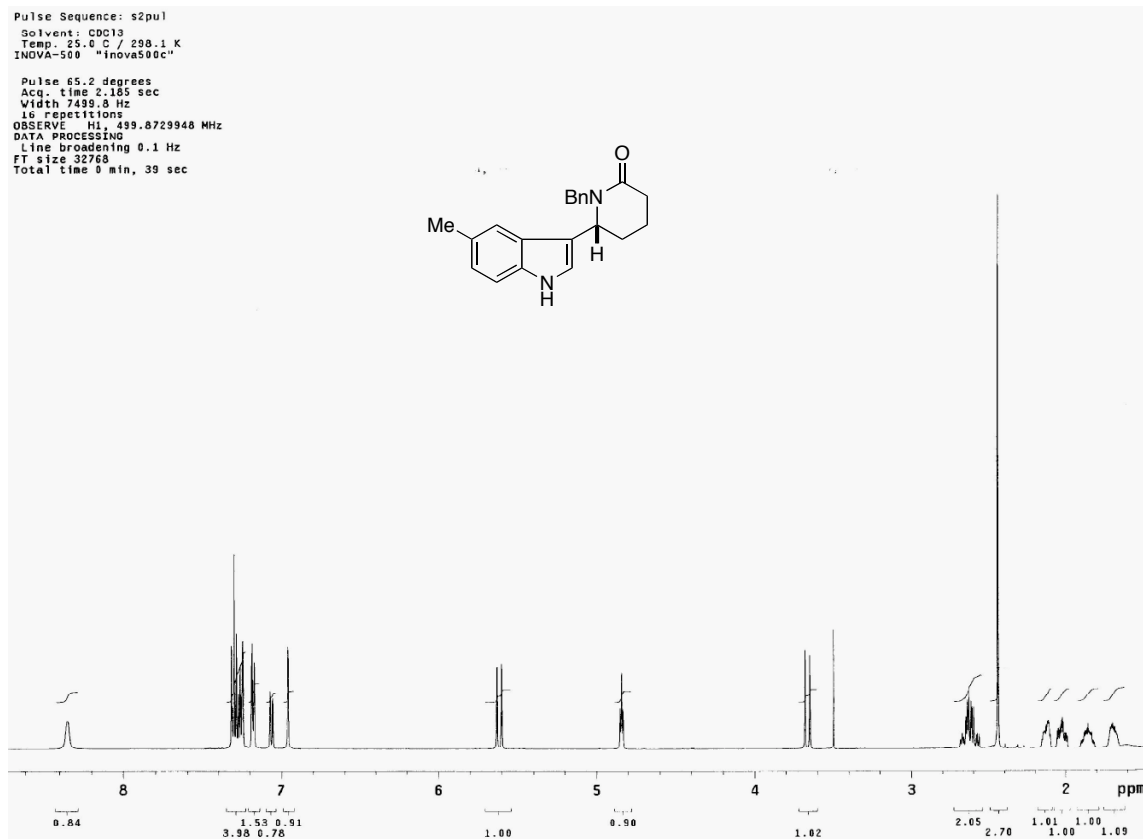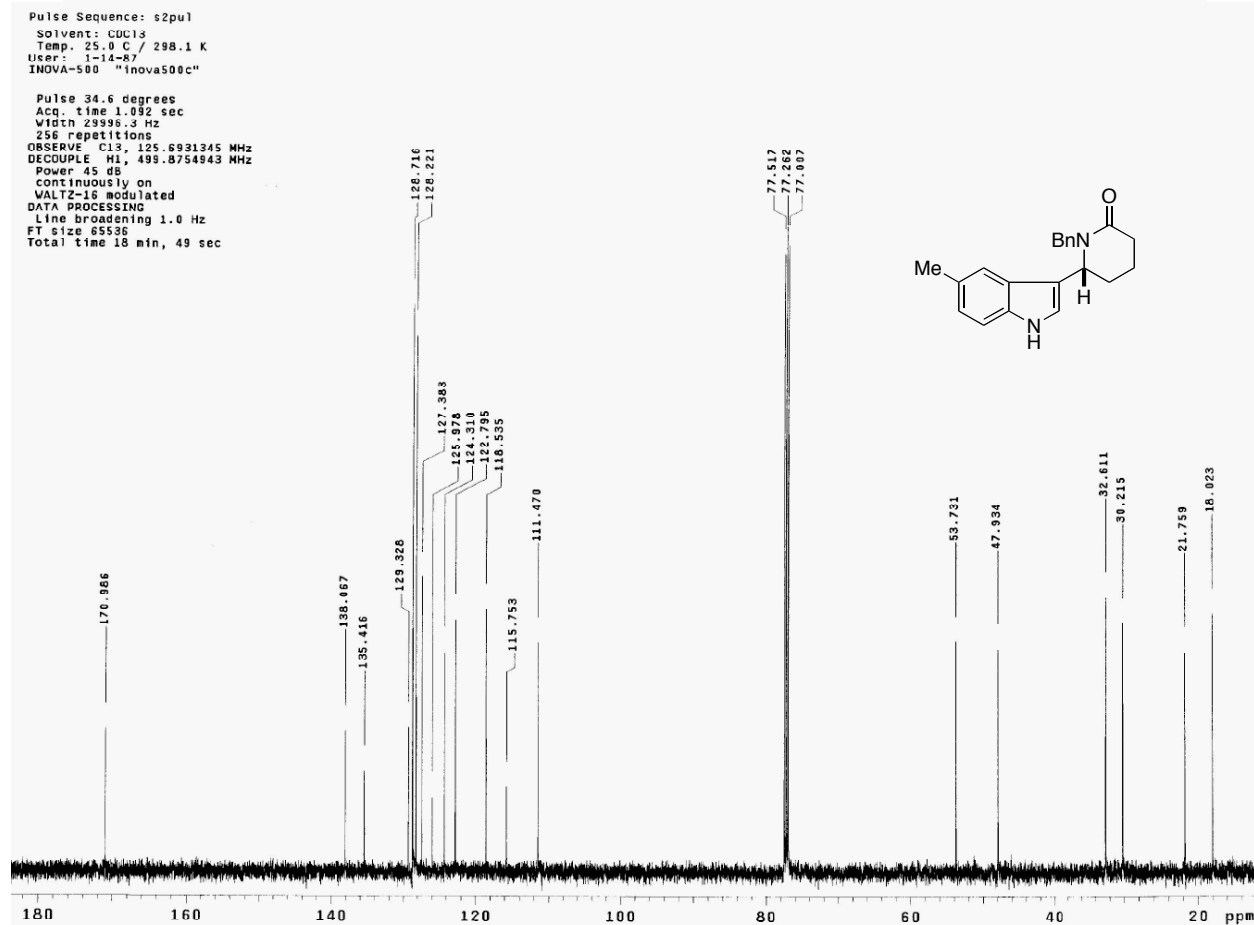

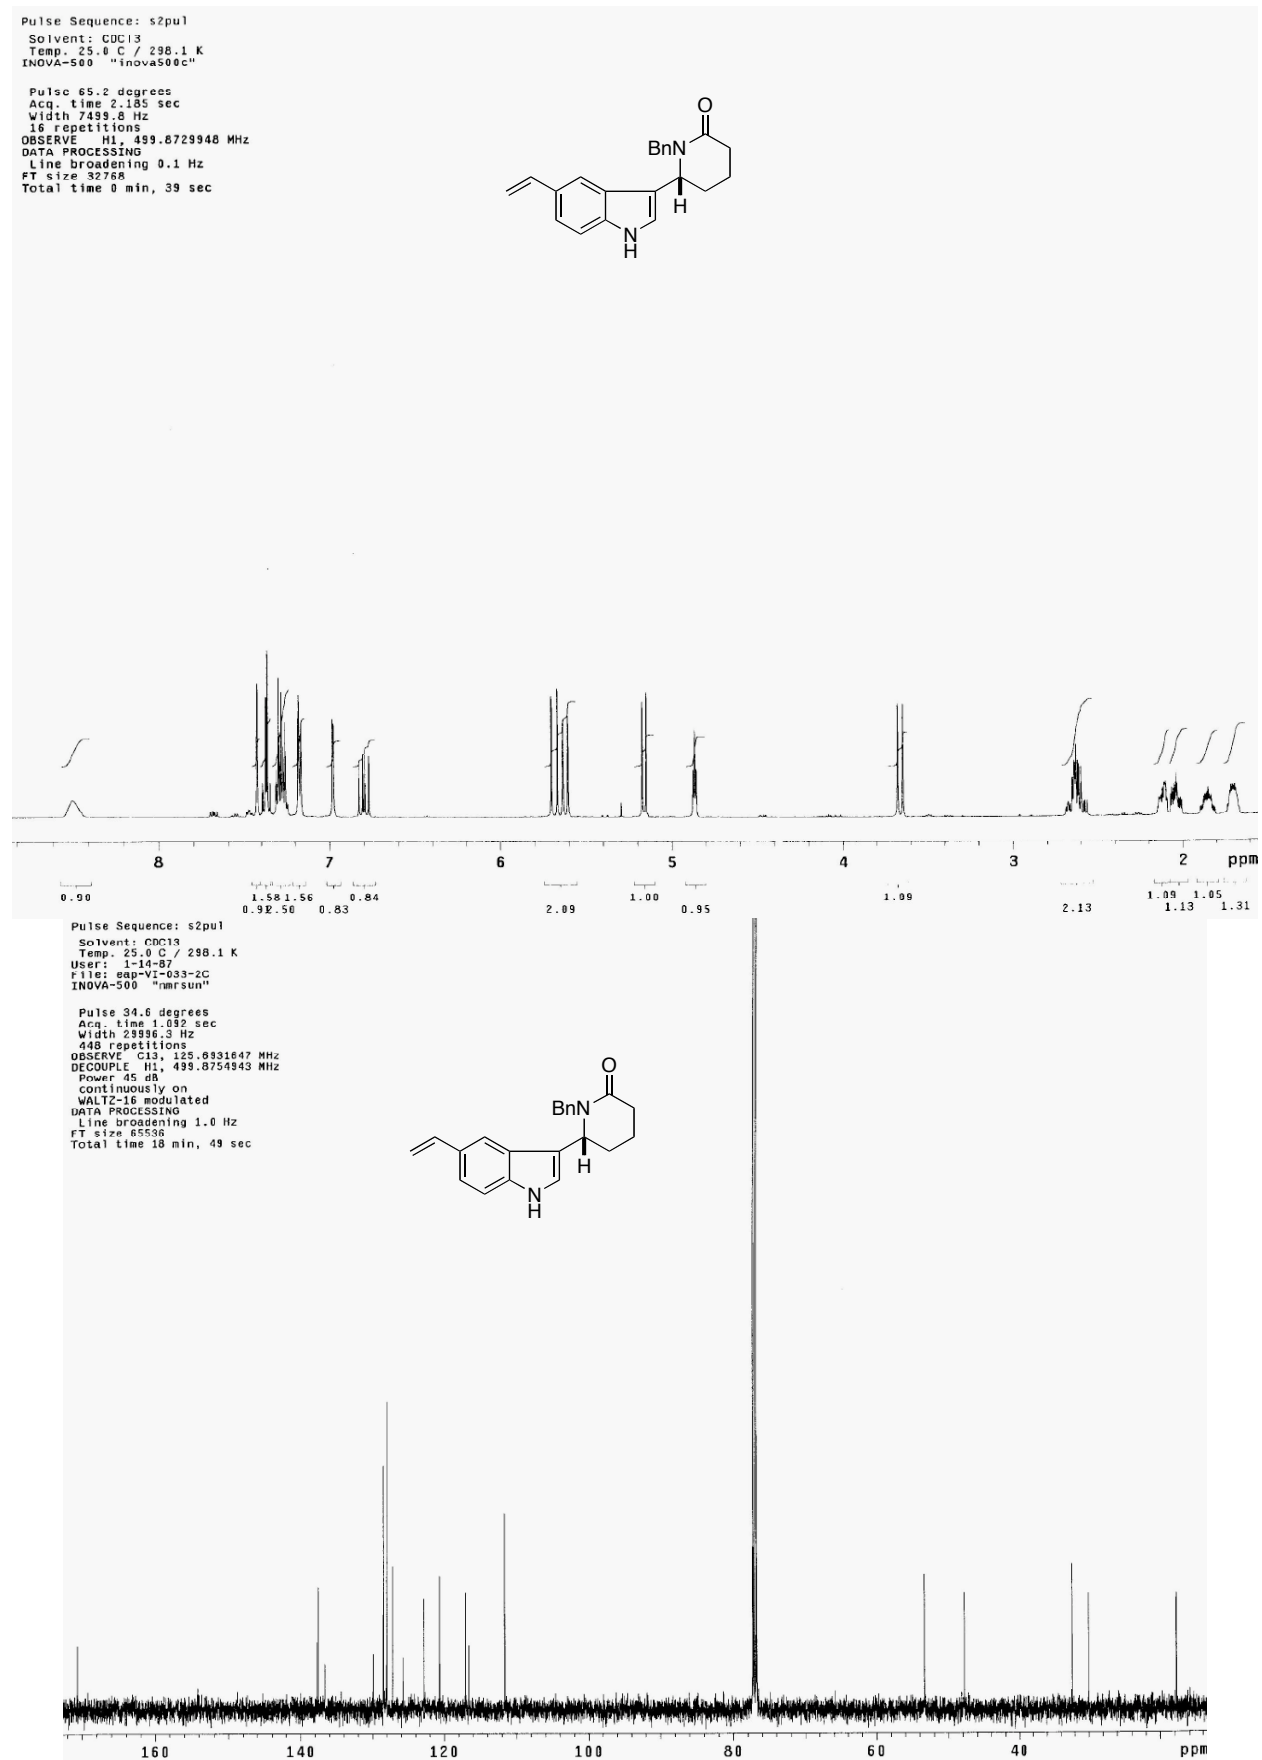

Pulse Sequence: s2pu1  
Solvent: CDCl3  
Temp: 25.0 C / 298.1 K  
File: exp-VI-023-2  
INOVA-500 "inova500c"  
Relax. delay 3.000 sec  
Pulse 65.2 degrees  
Acq. time 2.185 sec  
Width 7499.8 Hz  
16 repetitions  
OBSERVE H1, 499.8729948 MHz  
DATA PROCESSING  
Line broadening 0.1 Hz  
FT size 32768  
Total time 1 min, 33 sec

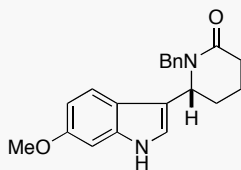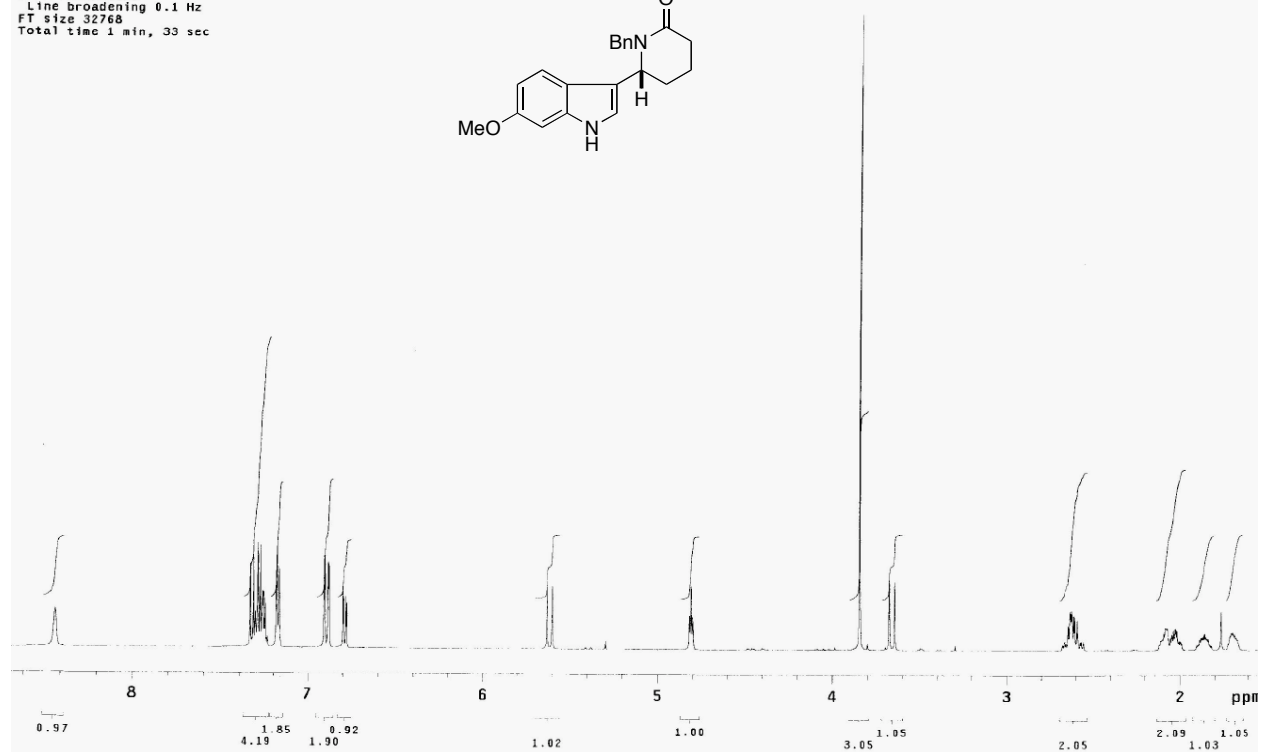

Pulse Sequence: s2pu1  
Solvent: CDCl3  
Temp: 25.0 C / 298.1 K  
User: 1-14-87  
INOVA-500 "inova500c"  
Pulse 34.6 degrees  
Acq. time 1.692 sec  
Width 29936.3 Hz  
256 repetitions  
OBSERVE C13, 125.6831675 MHz  
DECOUPLE H1, 499.8754943 MHz  
Power 45 dB  
continuously on  
VALTZ-16 modulated  
DATA PROCESSING  
Line broadening 1.0 Hz  
FT size 65536  
Total time 10 min, 49 sec

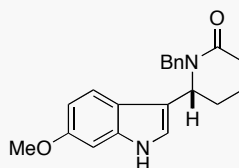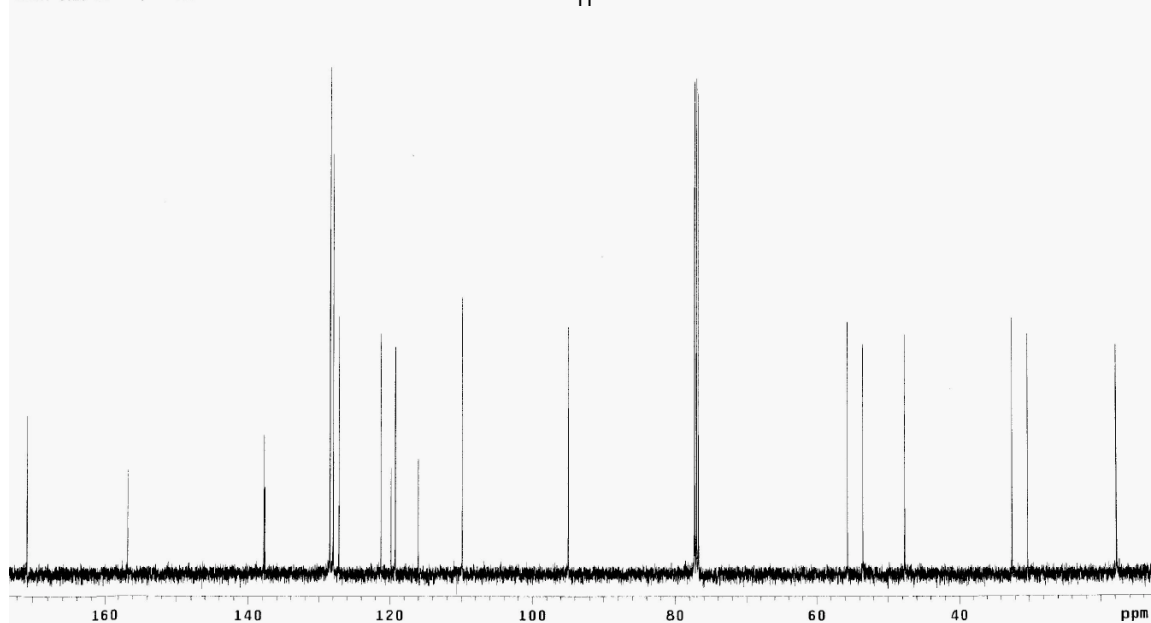

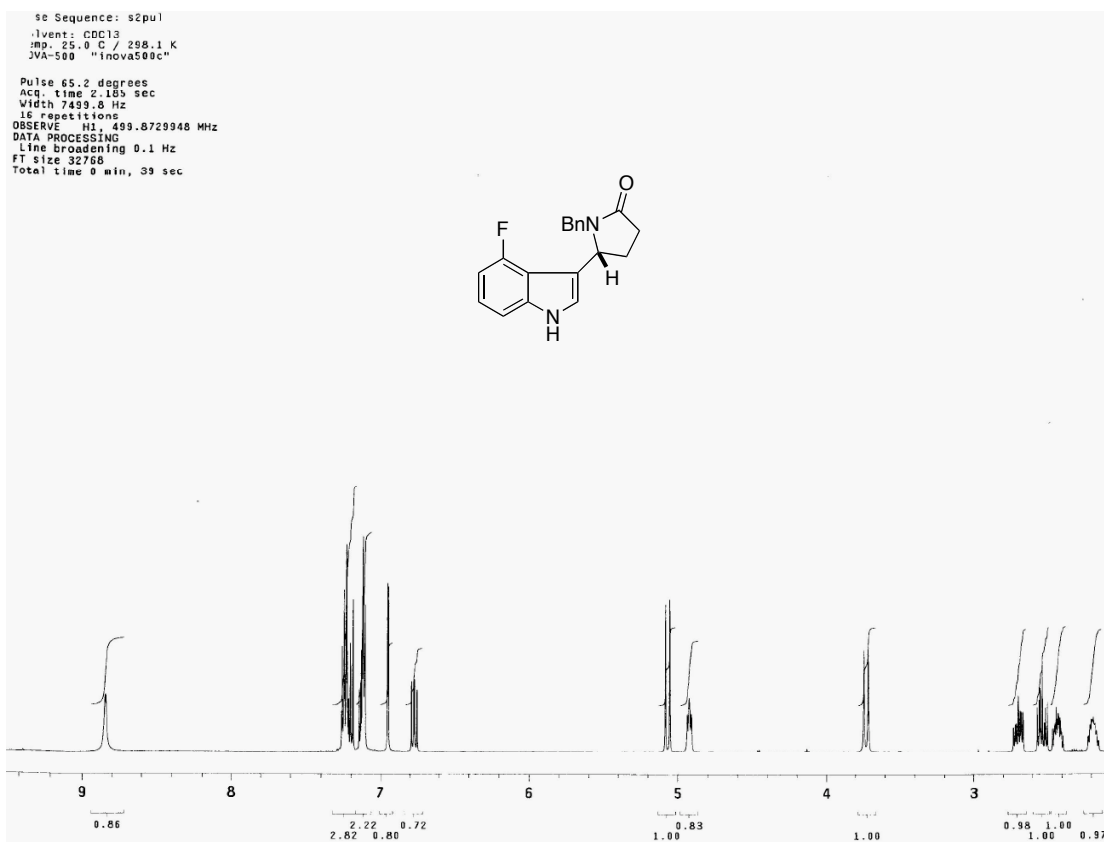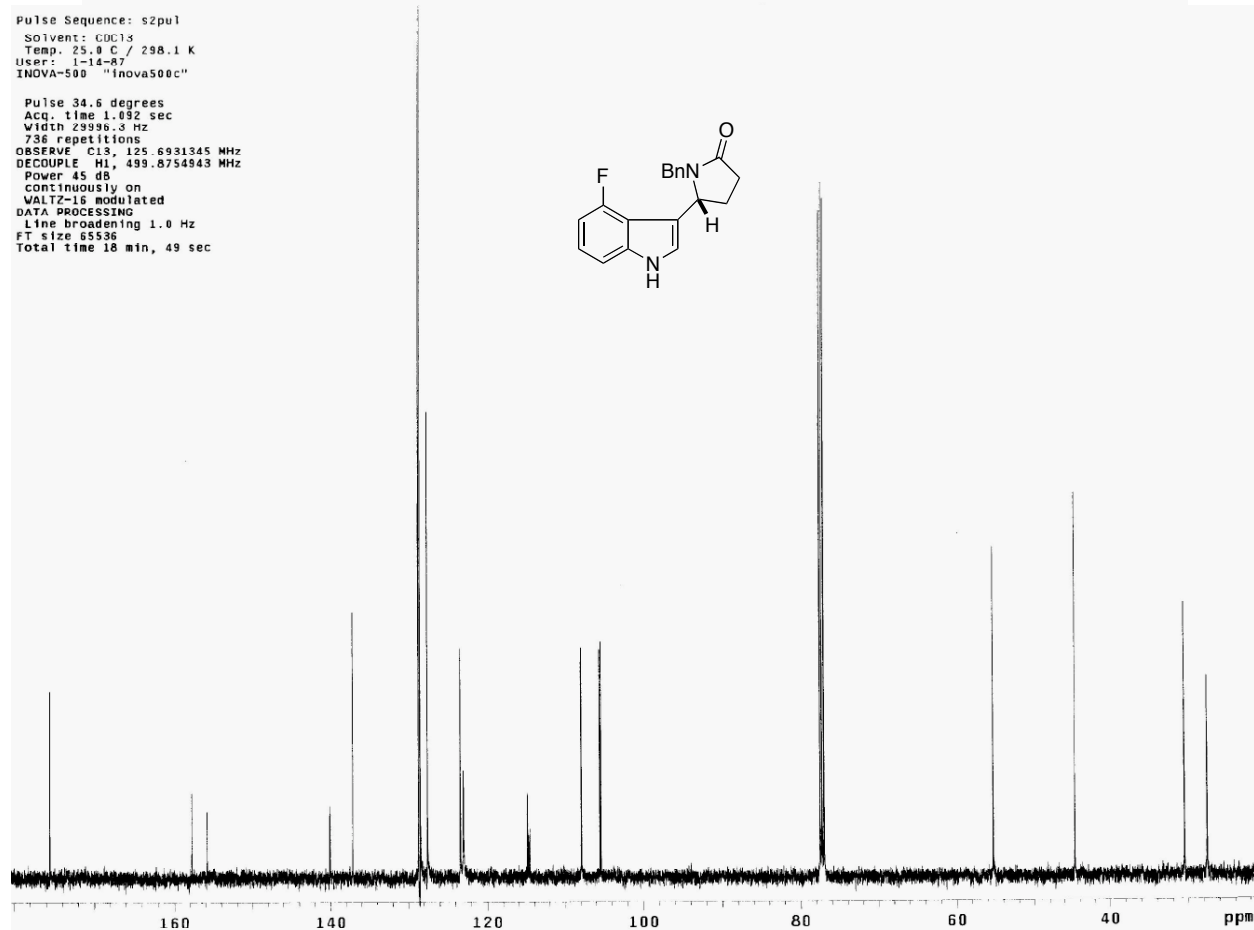

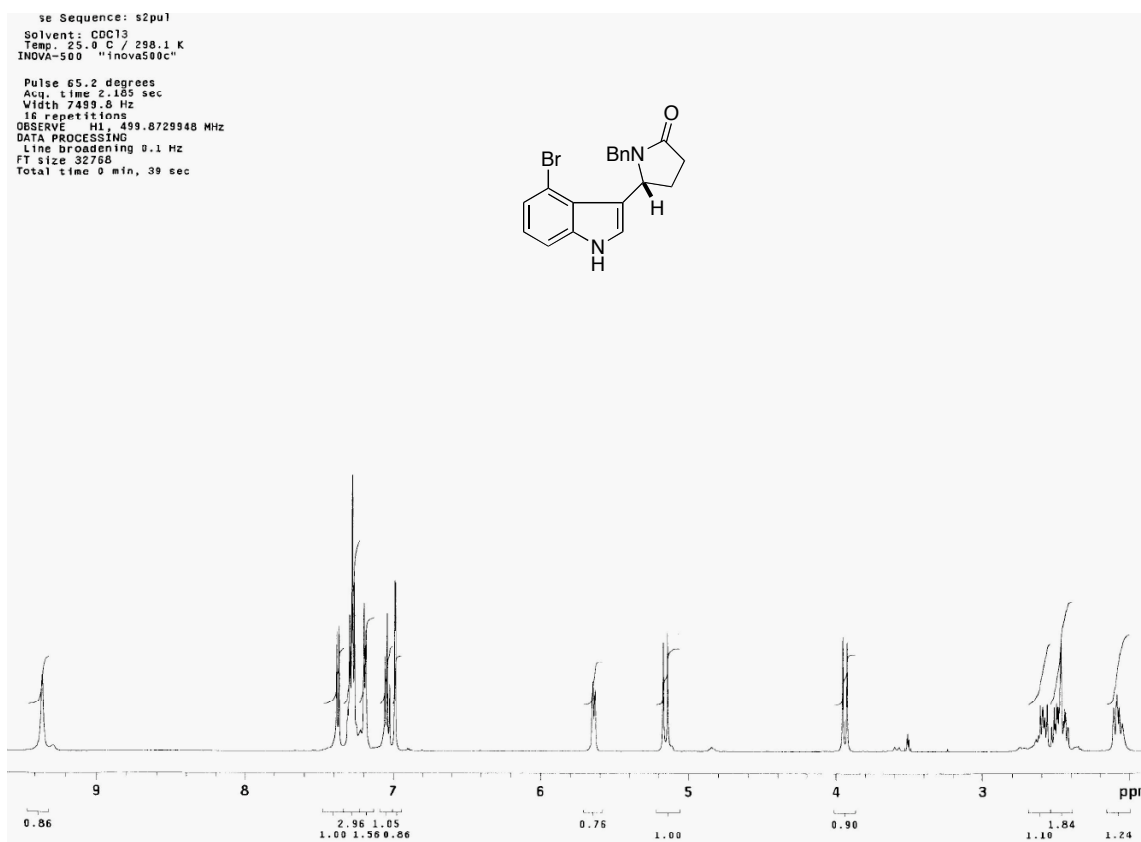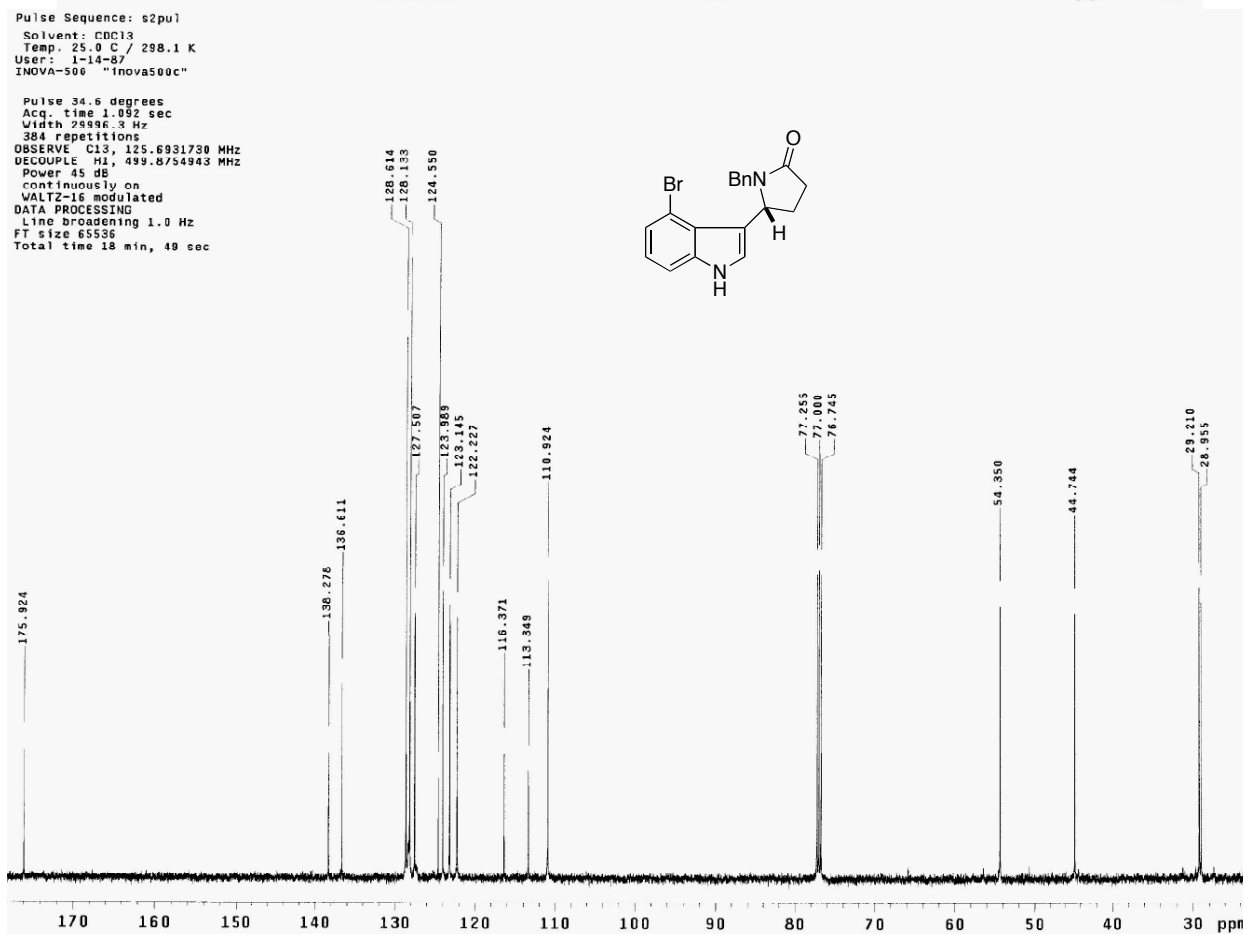

Pulse Sequence: s2pu1  
 Solvent: CDCl3  
 Temp. 25.0 C / 298.1 K  
 INOVA-500 "inova500c"  
 Pulse 65.2 degrees  
 Acq. time 2.195 sec  
 Width 7499.6 Hz  
 16 repetitions  
 OBSERVE H1, 499.8729948 MHz  
 DATA PROCESSING  
 Line broadening 0.1 Hz  
 FT size 32768  
 Total time 9 min, 39 sec

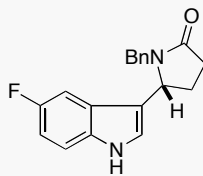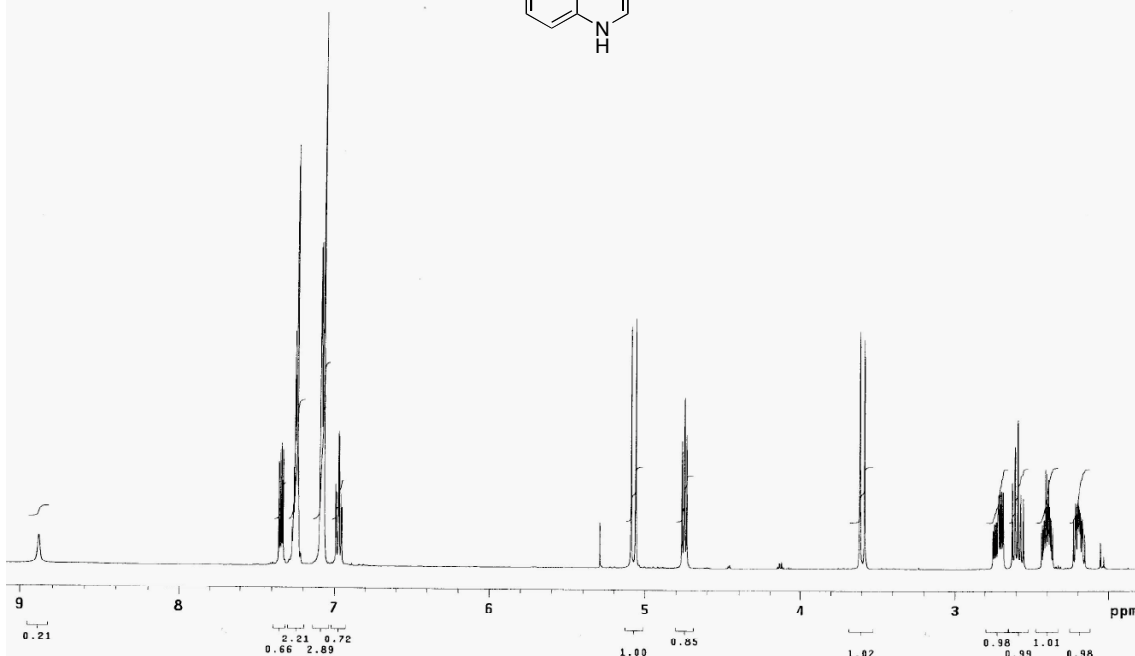

Pulse Sequence: s2pu1  
 Solvent: CDCl3  
 Temp. 25.0 C / 298.1 K  
 User: 1-14-87  
 INOVA-500 "inova500c"

Pulse 34.6 degrees  
 Acq. time 1.092 sec  
 Width 29996.3 Hz  
 288 repetitions  
 OBSERVE C13, 125.6931693 MHz  
 DECOUPLE H1, 499.8754943 MHz  
 Power 45 dB  
 continuously on  
 WALTZ-16 modulated  
 DATA PROCESSING  
 Line broadening 1.0 Hz  
 FT size 65536  
 Total time 16 min, 43 sec

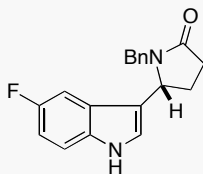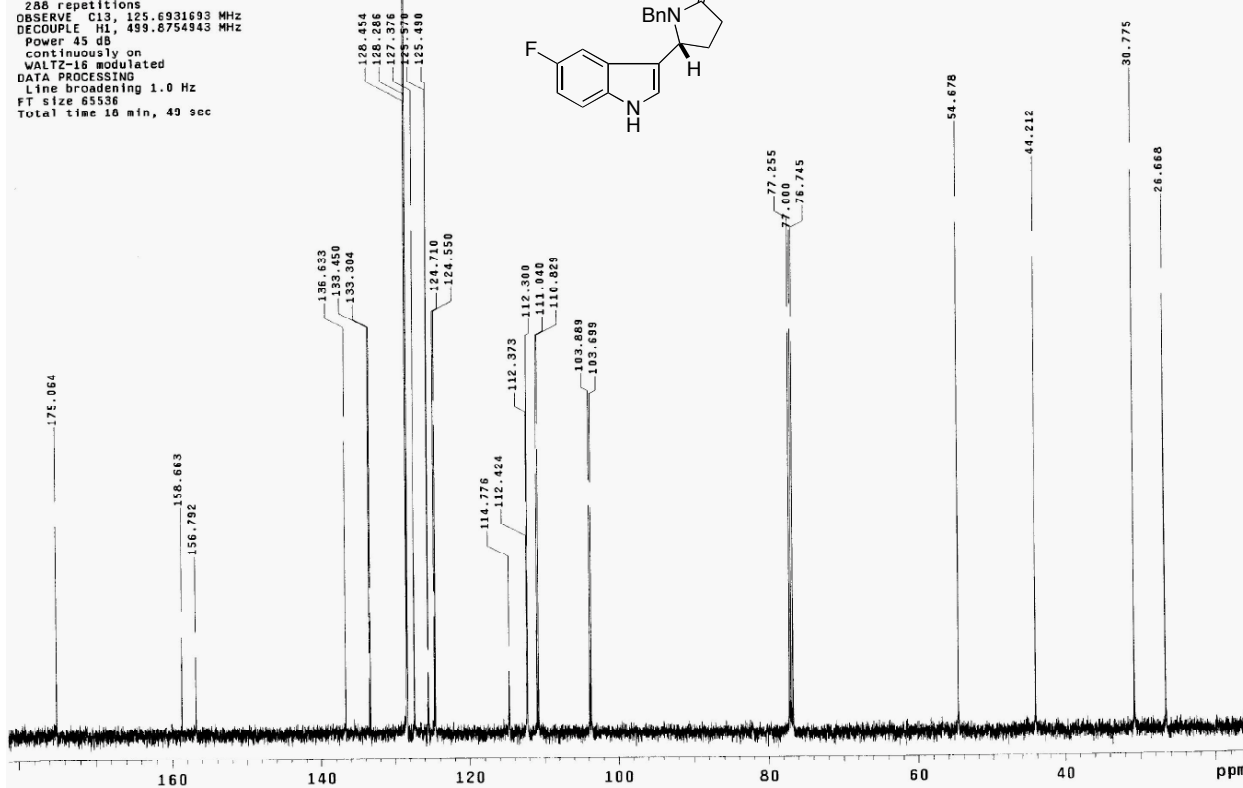

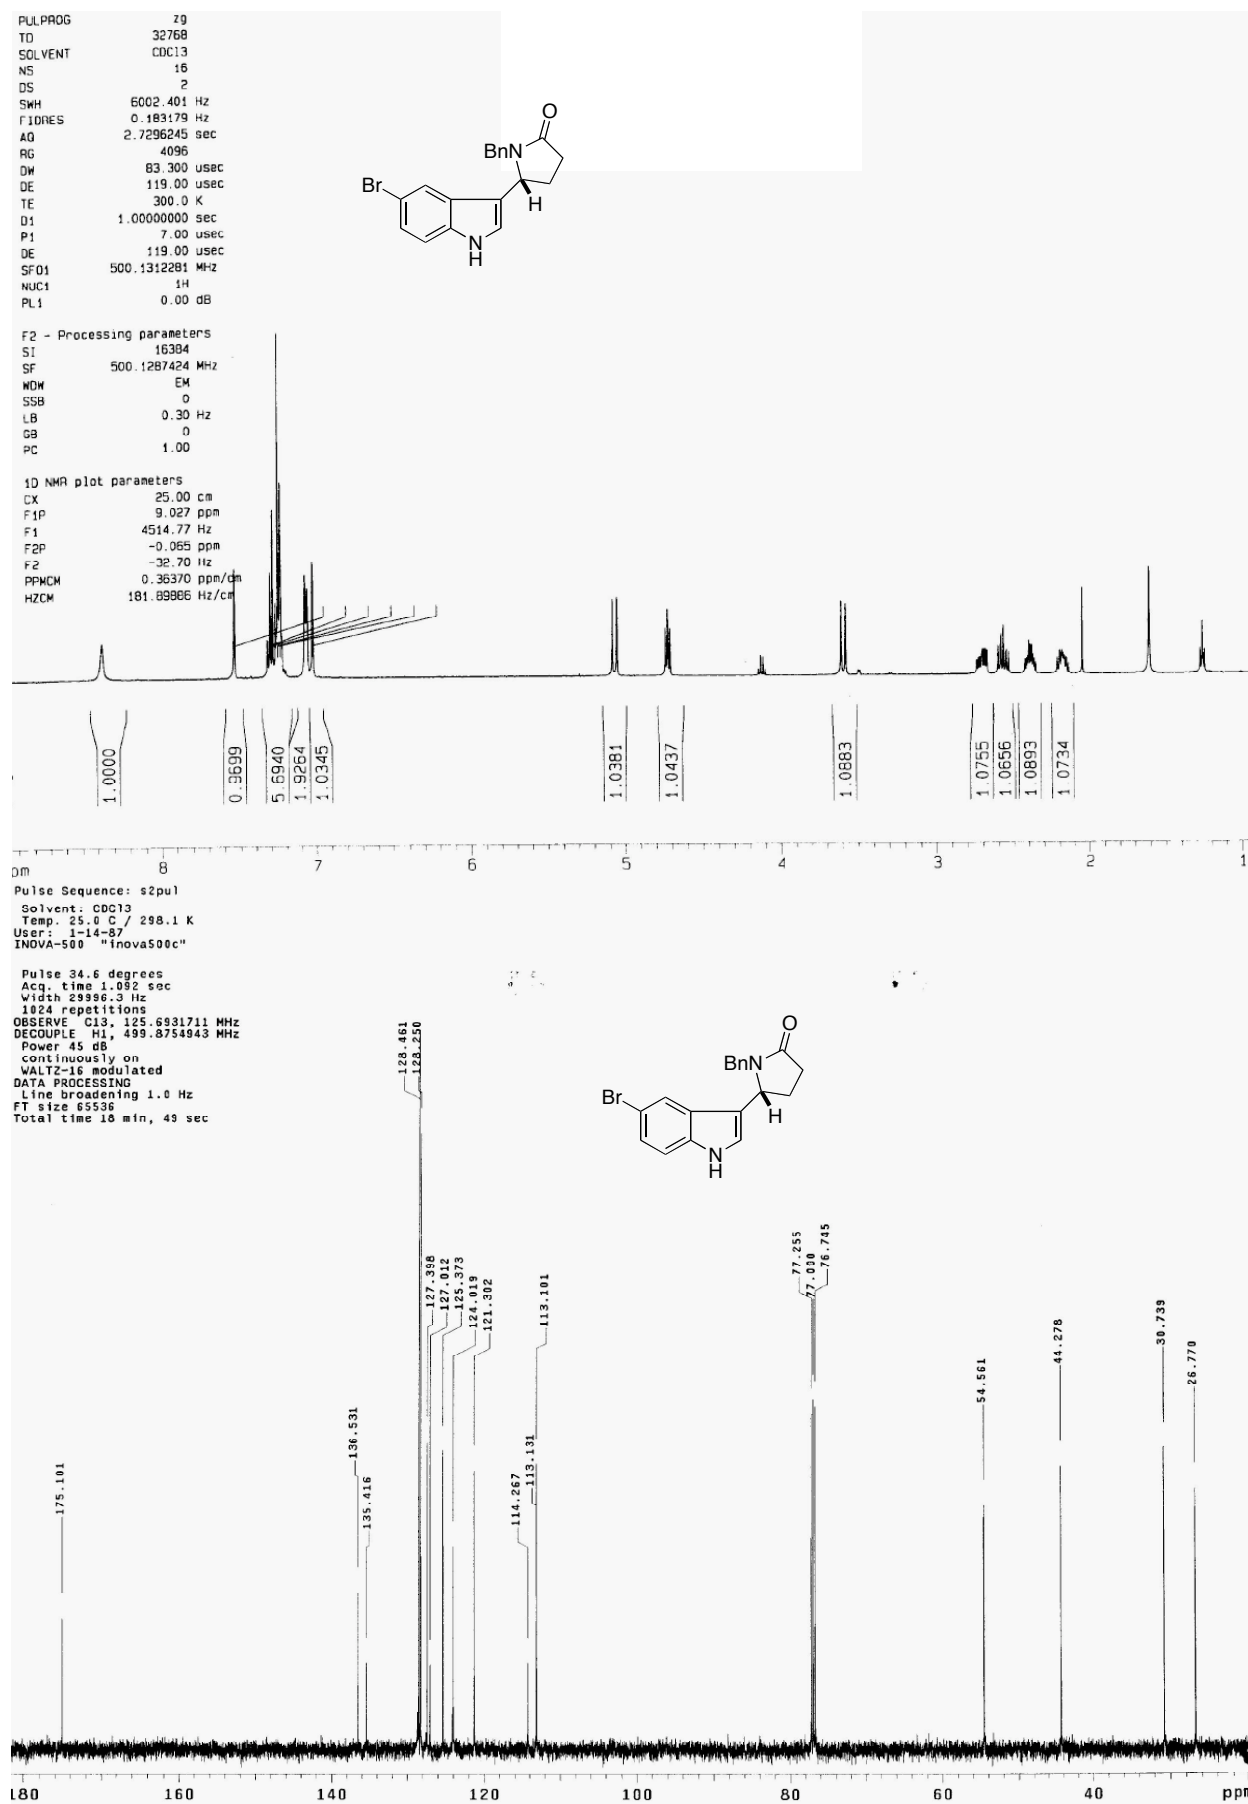



Pulse Sequence: s2pul  
Solvent: CDCl3  
Temp: 23.0 C / 296.1 K  
INOVA-500 "inova500c"  
Pulse 65.2 degrees  
Acq. time 2.165 sec  
Width 7499.8 Hz  
16 repetitions  
OBSERVE H1, 499.8729948 MHz  
DATA PROCESSING  
Line broadening 0.1 Hz  
FT size 32768  
Total time 0 min, 39 sec

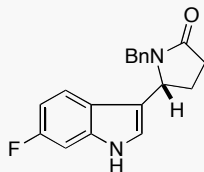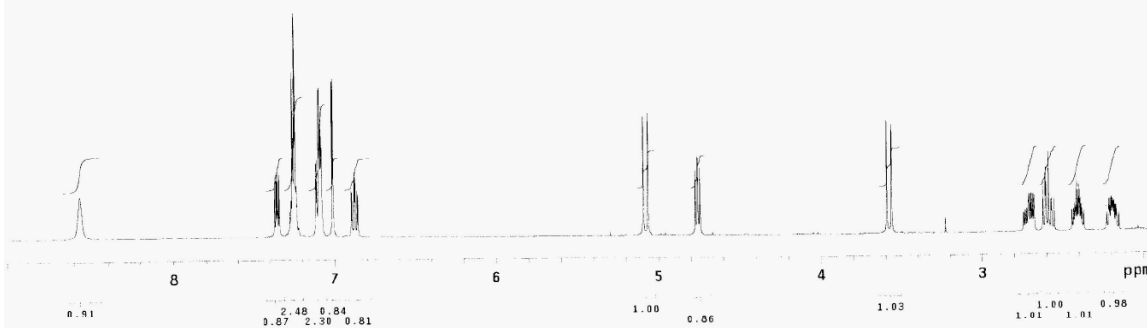

Pulse Sequence: s2pul  
Solvent: CDCl3  
Temp: 23.0 C / 296.1 K  
User: 1-14-87  
INOVA-500 "inova500c"  
Pulse 31.6 degrees  
Acq. time 1.692 sec  
Width 29996.3 Hz  
256 repetitions  
OBSERVE C13, 125.6931684 MHz  
DECOUPLE H1, 499.8754943 MHz  
Power 45 dB  
continuously on  
WALTZ-16 modulated  
DATA PROCESSING  
Line broadening 1.0 Hz  
FT size 65536  
Total time 18 min, 49 sec

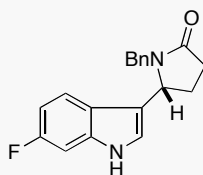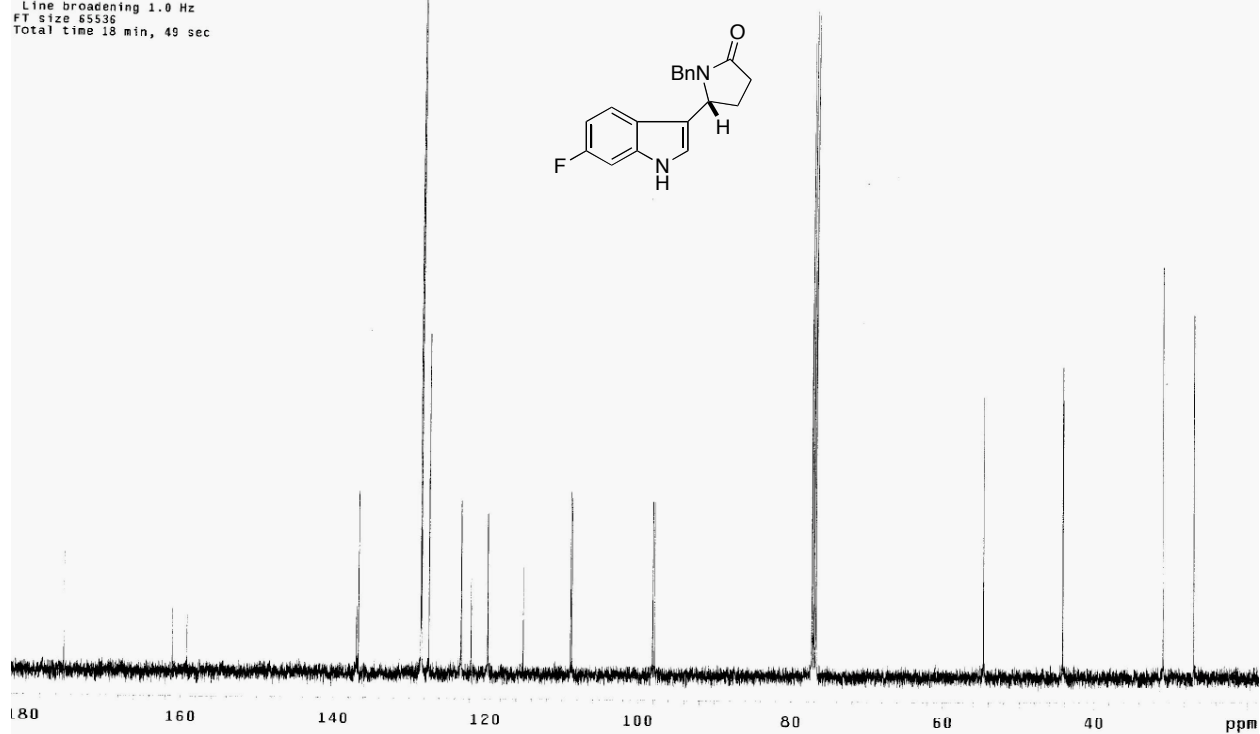

Data Collected on:  
boris-inova000  
Archive directory:  
/export/home/1600/vnmr/sys/data  
Sample directory:  
File: PROTON

Pulse Sequence: s2pu1  
Solvent: CDCl3  
Temp. 22.0 C / 295.1 K

Relax. delay 1.000 sec  
Pulse 45.0 degrees  
Acq. time 3.641 sec  
Width 3996.3 Hz  
8 repetitions  
OBSERVE H1, 599.7764064 MHz  
DATA PROCESSING  
Line broadening 0.1 Hz  
FT size 131072  
Total time 0 min

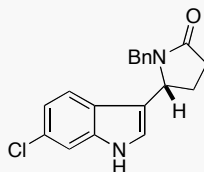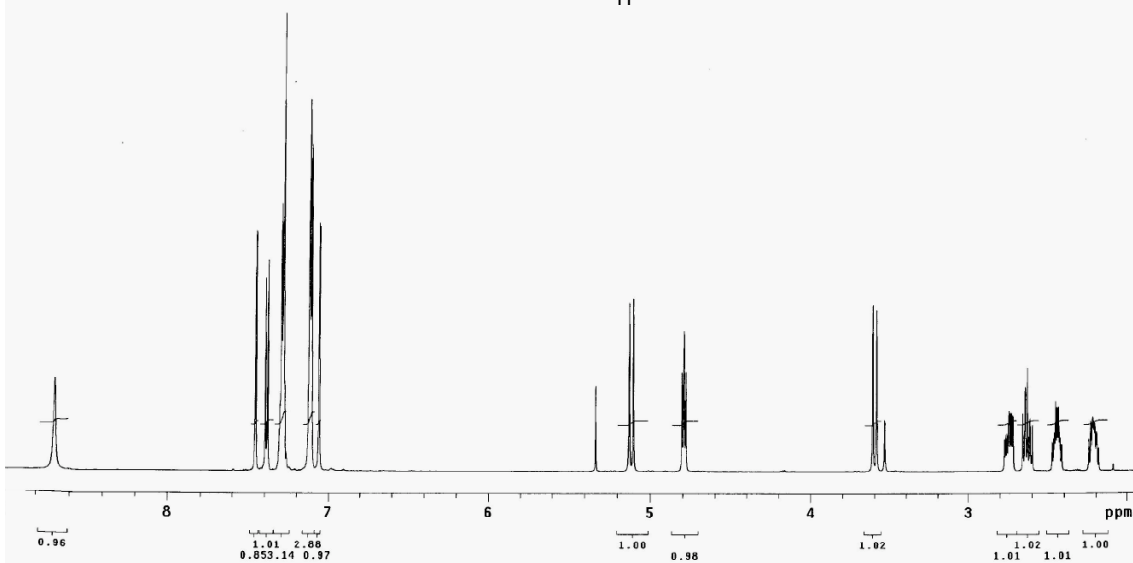

Pulse Sequence: s2pu1  
Solvent: CDCl3  
Temp. 25.0 C / 298.1 K  
User: 1-14-87  
INDVA-500 "inova500c"

Pulse 34.6 degrees  
Acq. time 1.032 sec  
Width 2996.3 Hz  
320 repetitions  
OBSERVE C13, 125.6931675 MHz  
DECOUPLE H1, 499.8754943 MHz  
Power 45 dB  
continuously on  
VALTZ-16 modulated  
DATA PROCESSING  
Line broadening 1.0 Hz  
FT size 65536  
Total time 18 min, 49 sec

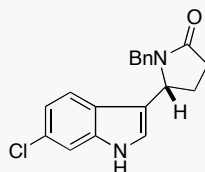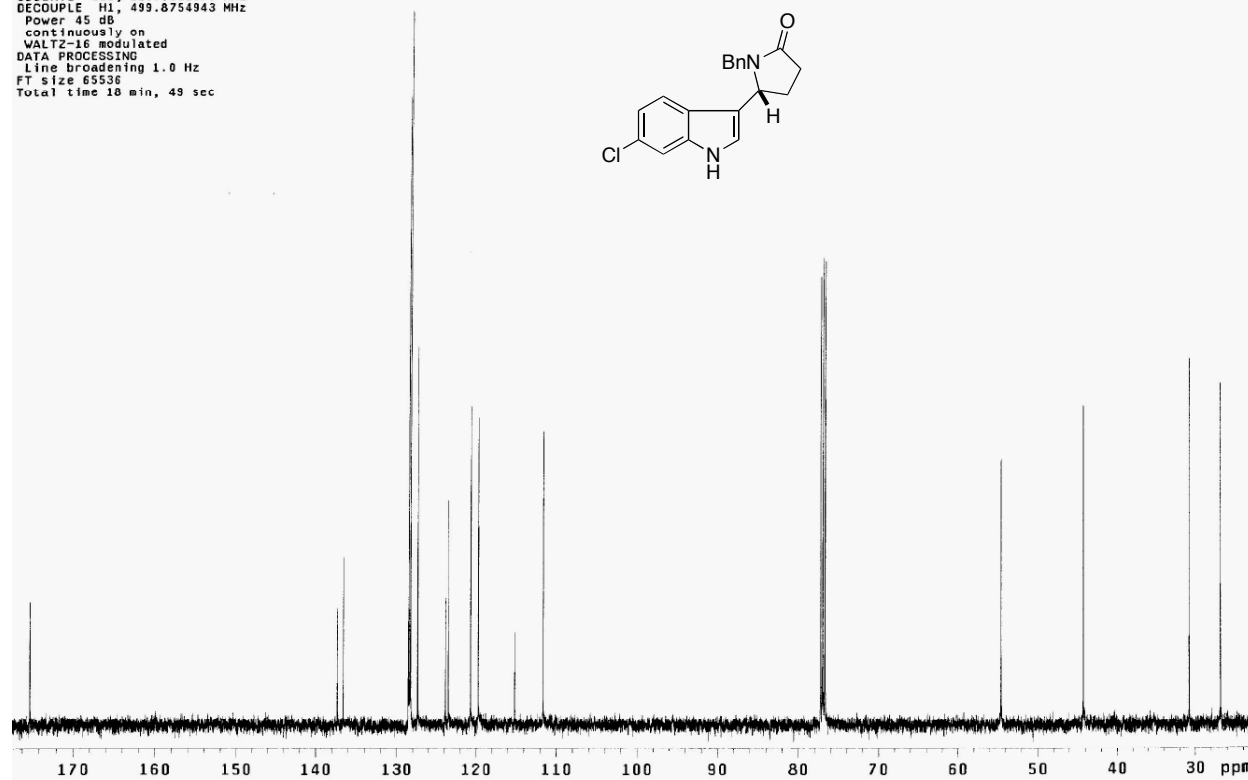

Pulse Sequence: s2pul  
Solvent: DMSO  
Temp: 25.0 C / 298.1 K  
INOVA-500 "inova500c"  
  
Pulse 51.8 degrees  
Acq. time 2.185 sec  
Width 7499.8 Hz  
In repetitions  
OBSERVE H1, 499.8753159 MHz  
DATA PROCESSING  
Line broadening 0.1 Hz  
FT size 32768  
Total time 0 min, 39 sec

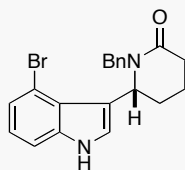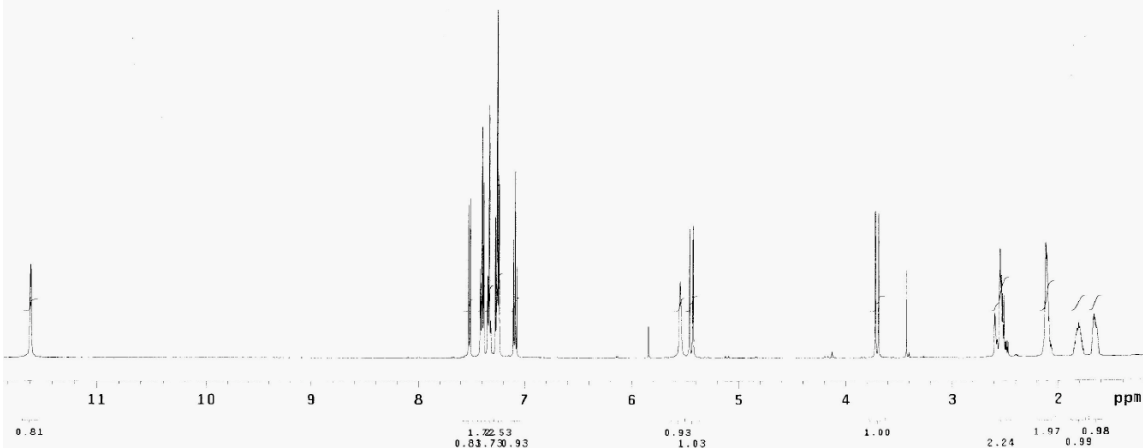

Pulse Sequence: s2pul  
Solvent: DMSO  
Temp: 25.0 C / 298.1 K  
User: 1-14-87  
INOVA-500 "inova500c"  
  
Pulse 34.6 degrees  
Acq. time 1.092 sec  
Width 29996.3 Hz  
640 repetitions  
OBSERVE C13, 125.6938225 MHz  
DECUPLE H1, 499.8778587 MHz  
Power 45 dB  
continuously on  
WALTZ-16 modulated  
DATA PROCESSING  
Line broadening 1.0 Hz  
FT size 65536  
Total time 18 min, 49 sec

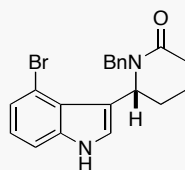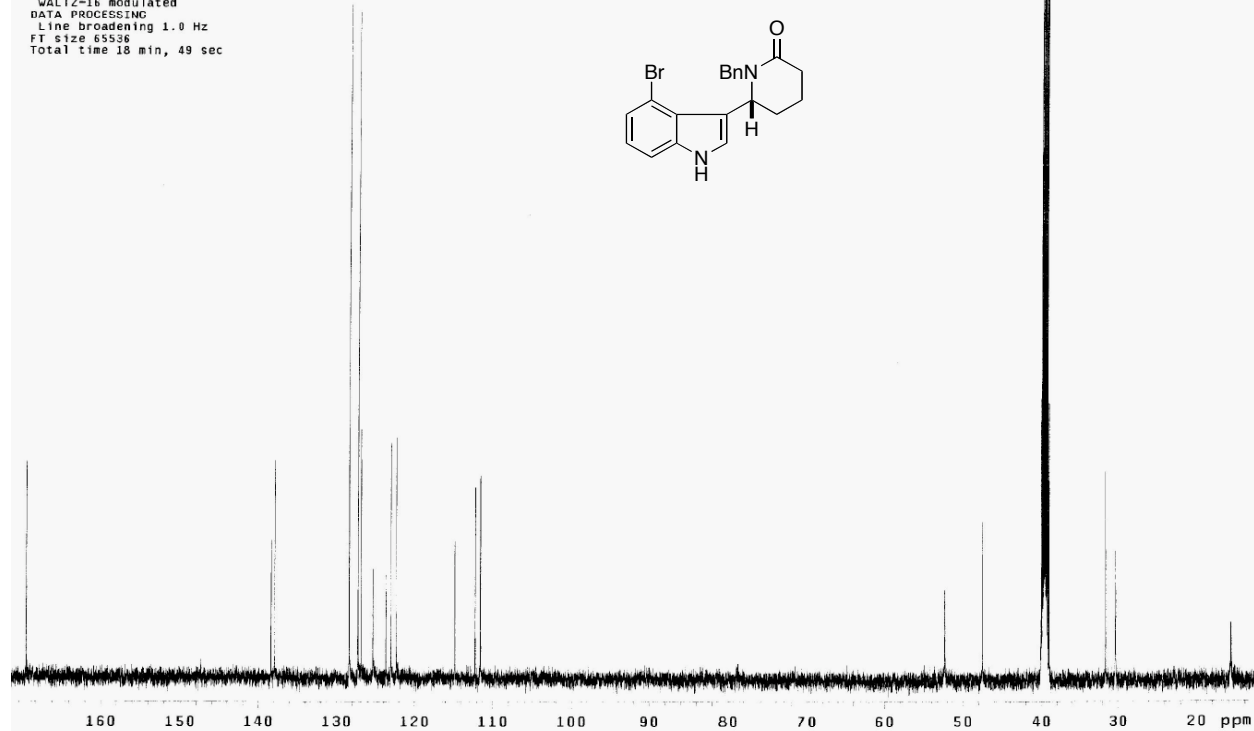

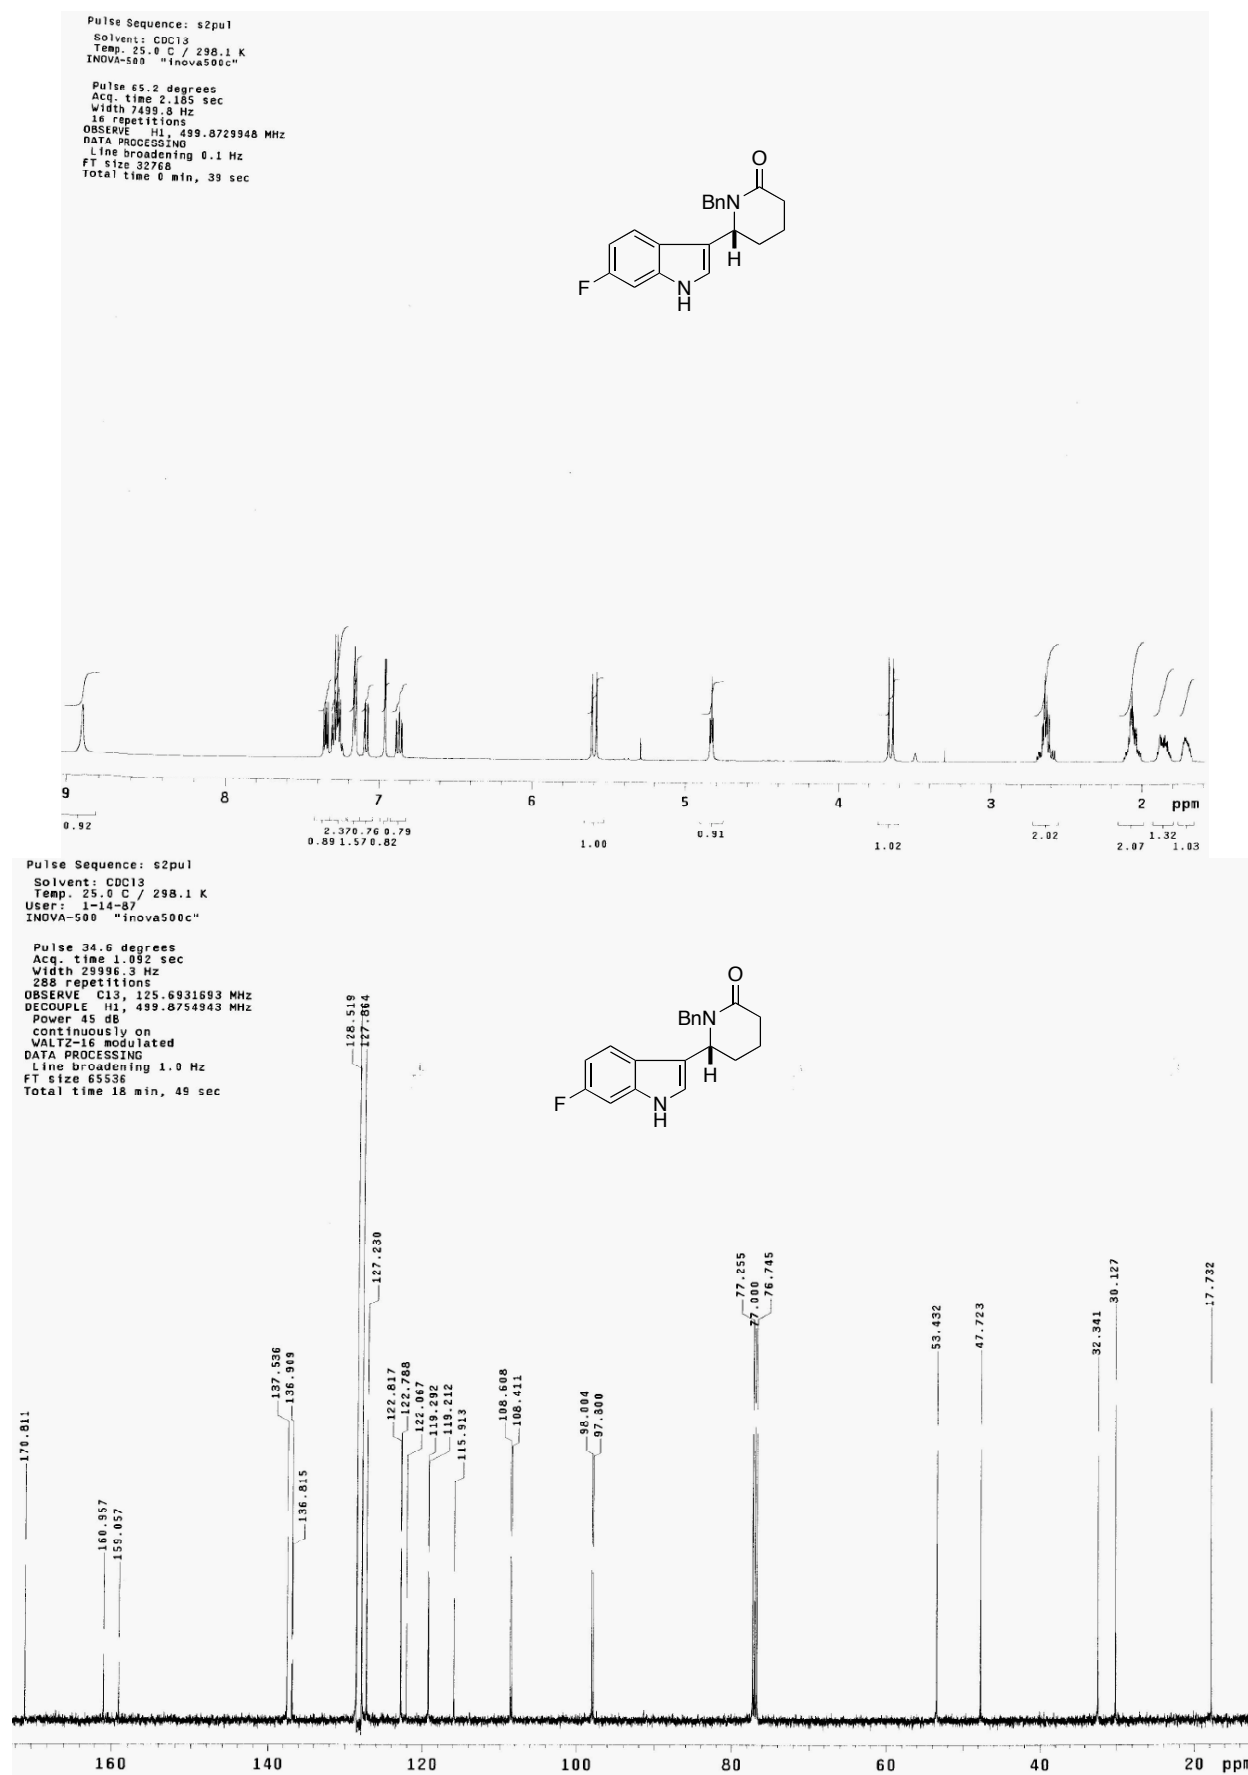

Pulse Sequence: s2pul  
 Solvent: CDCl3  
 Temp: 25.0 C / 298.1 K  
 INOVA-500 "inova500c"  
 Pulse 65.2 degrees  
 Acq. time 2.185 sec  
 Width 7499.8 Hz  
 16 repetitions  
 OBSERVE H1, 499.872948 MHz  
 DATA PROCESSING  
 Line broadening 0.1 Hz  
 FT size 32768  
 Total time 0 min, 39 sec

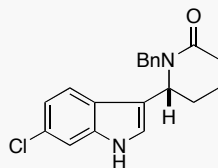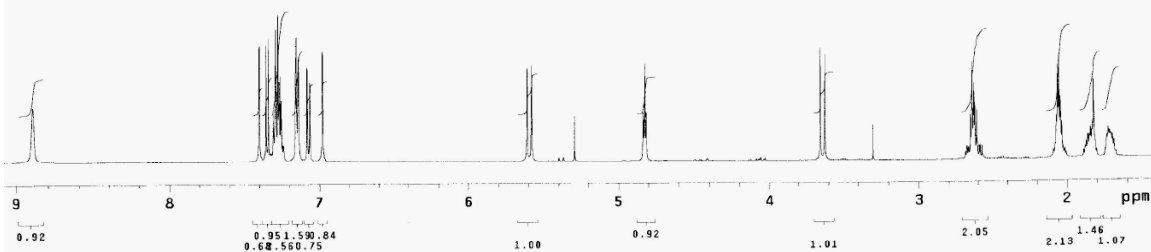

Pulse Sequence: s2pul  
 Solvent: CDCl3  
 Temp: 25.0 C / 298.1 K  
 User: j-14-87  
 INOVA-500 "inova500c"  
 Pulse 34.6 degrees  
 Acq. time 1.992 sec  
 Width 29896.3 Hz  
 352 repetitions  
 OBSERVE C13, 125.6931684 MHz  
 DECOUPLE H1, 499.8754943 MHz  
 Power 45 dB  
 continuously on  
 VALTZ-16 modulated  
 DATA PROCESSING  
 Line broadening 1.0 Hz  
 FT size 65536  
 Total time 18 min, 49 sec

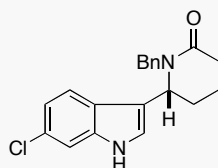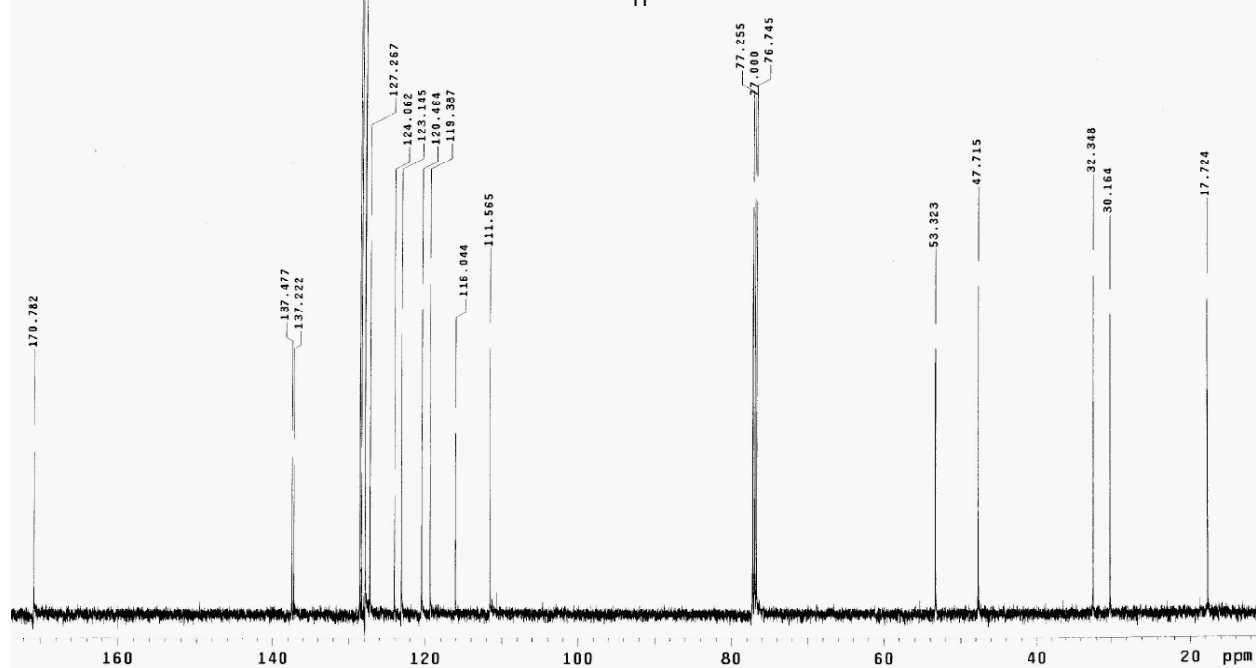

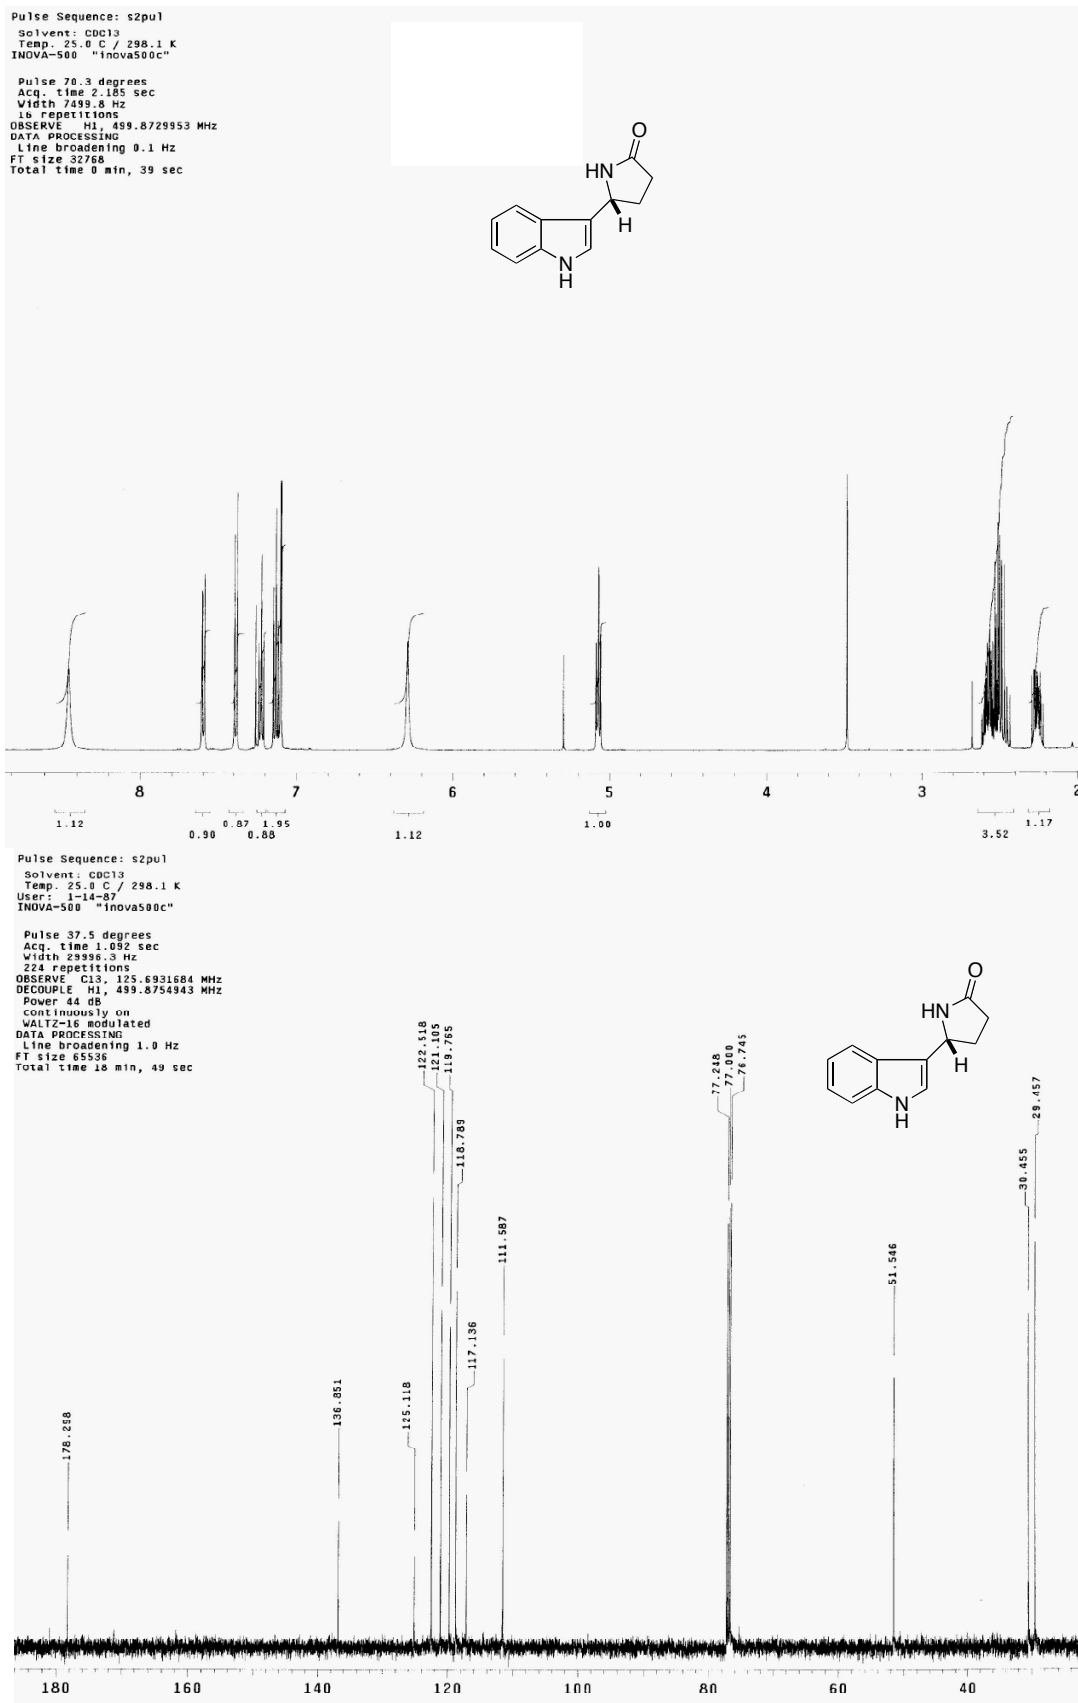

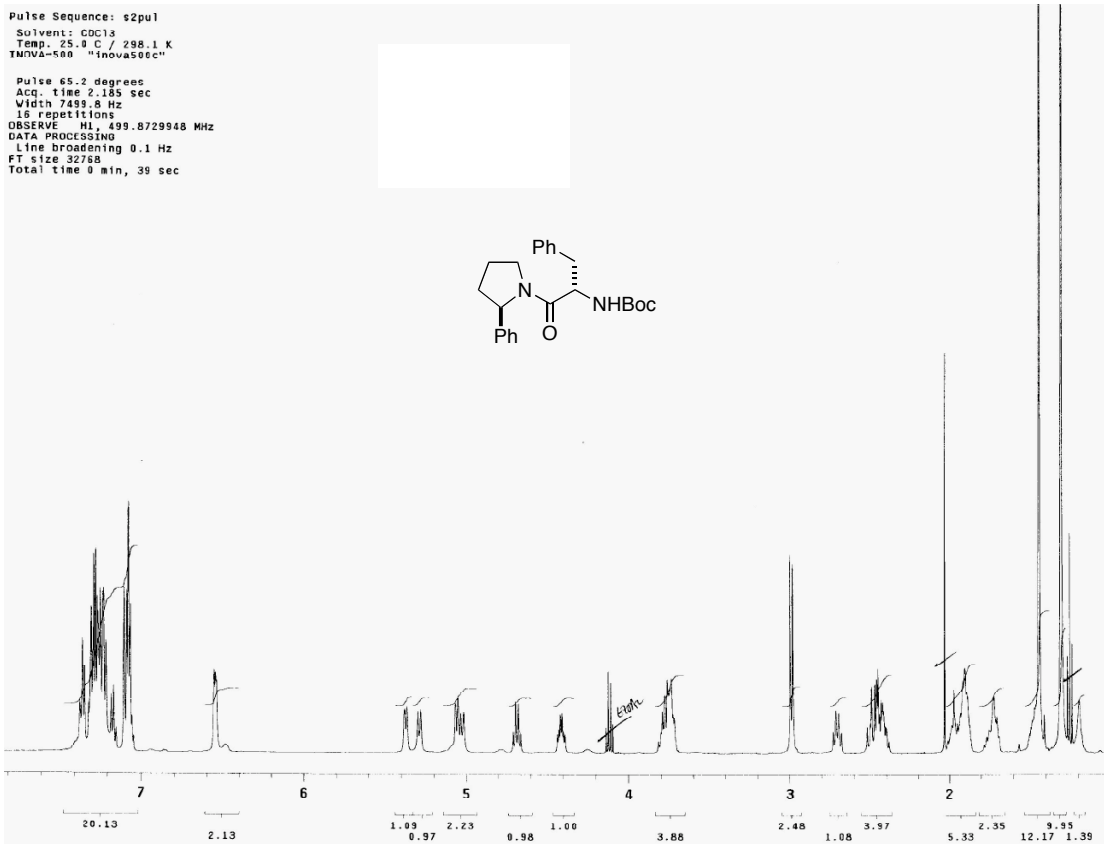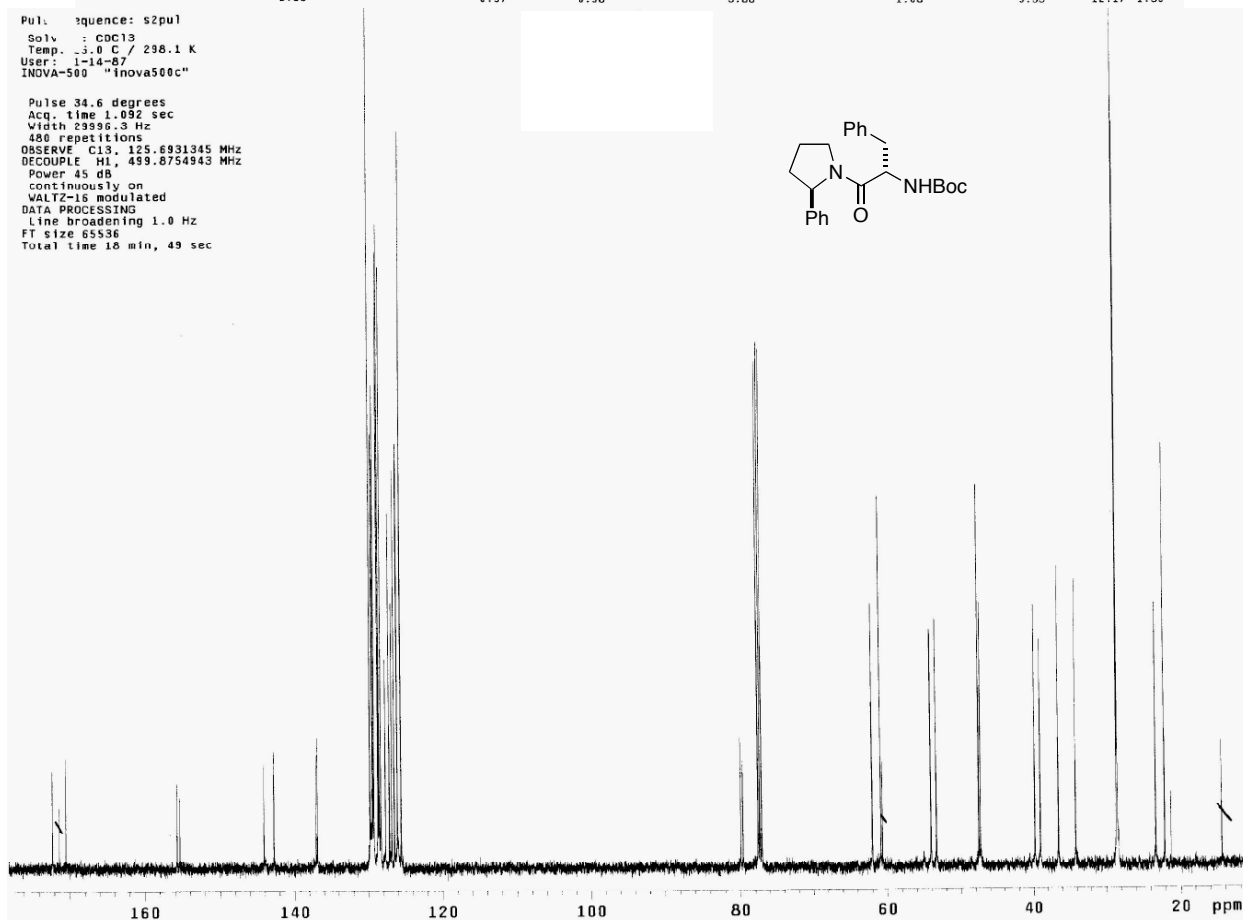

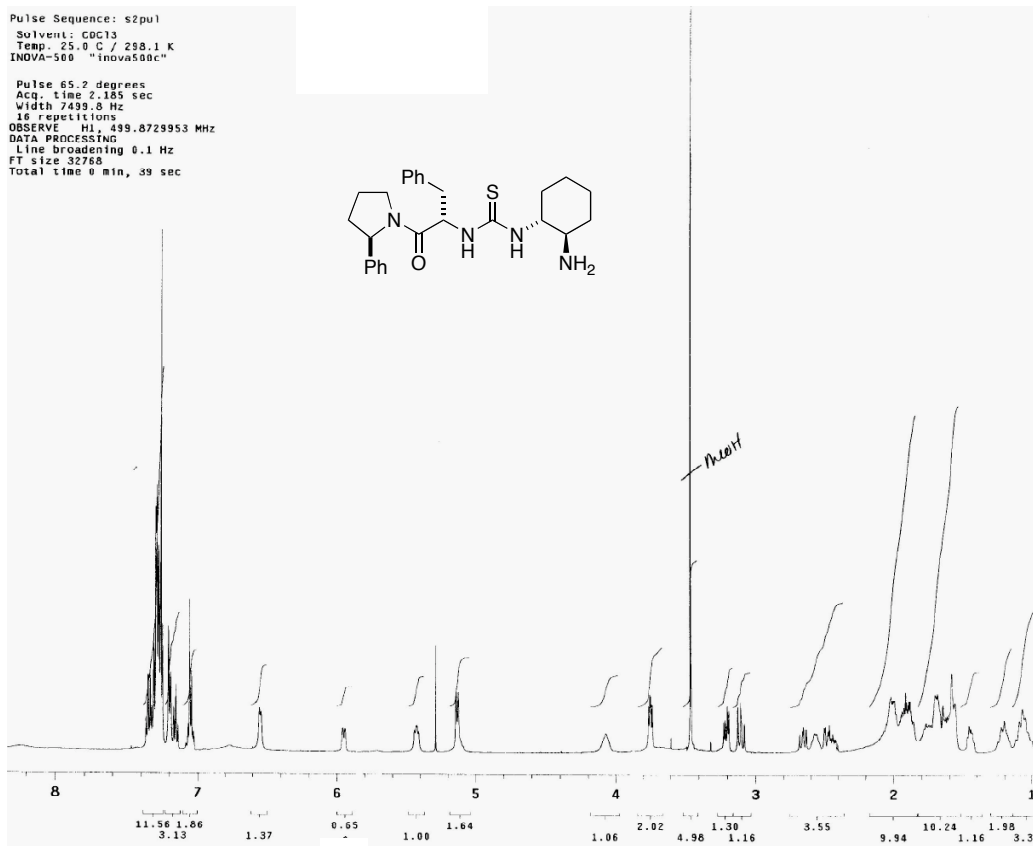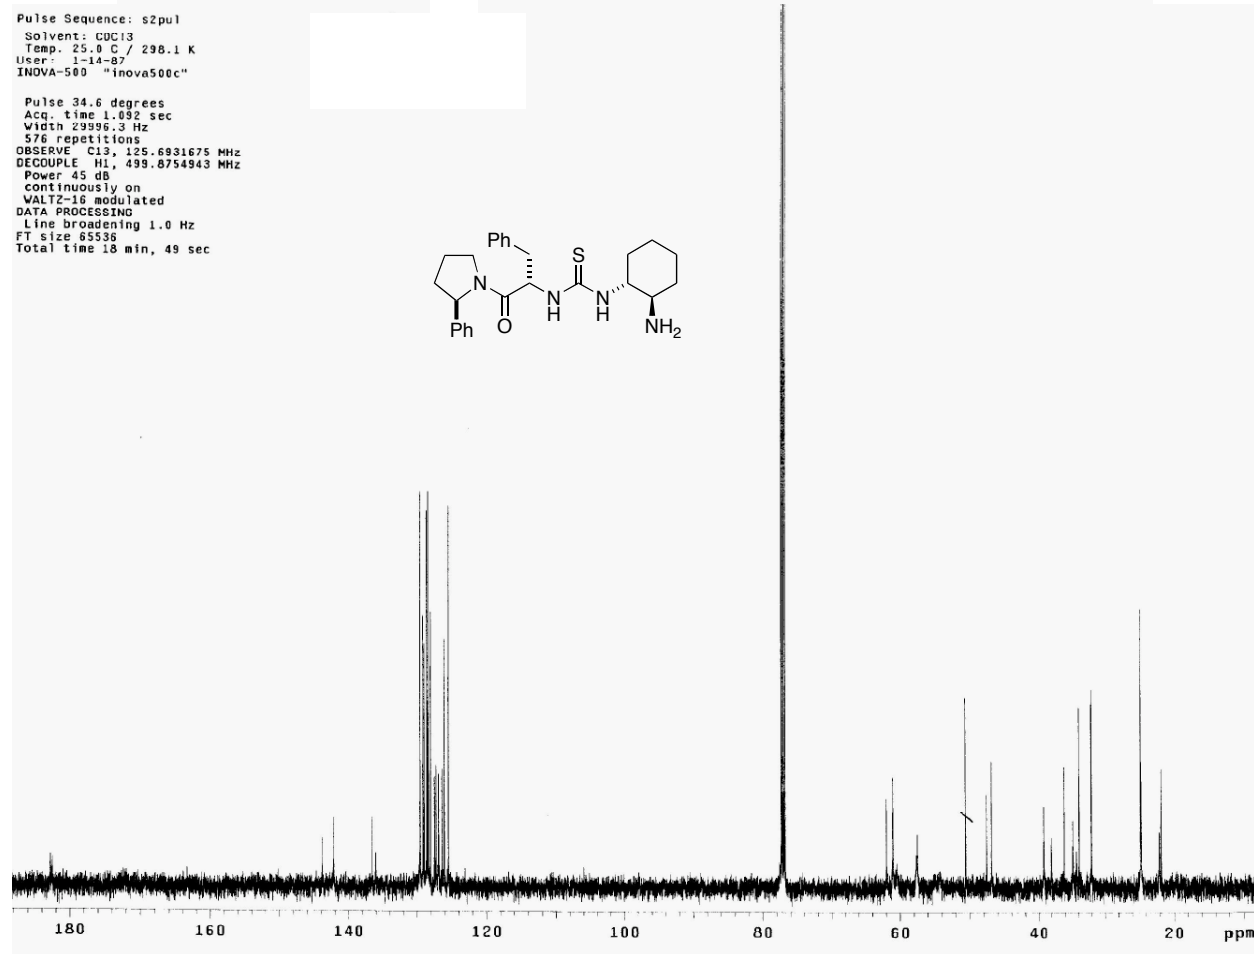



Pulse Sequence: s2pu1  
Solvent: CDCl3  
Temp: 23.0 C / 296.1 K  
INOVA-500 "inova500c"  
  
Pulse 65.2 degrees  
Acq. time 2.185 sec  
Width 7499.8 Hz  
16 repetitions  
OBSERVE H1, 499.8729953 MHz  
DATA PROCESSING  
Line broadening 0.1 Hz  
FT size 32768  
Total time 0 min, 39 sec

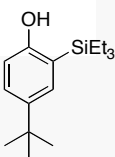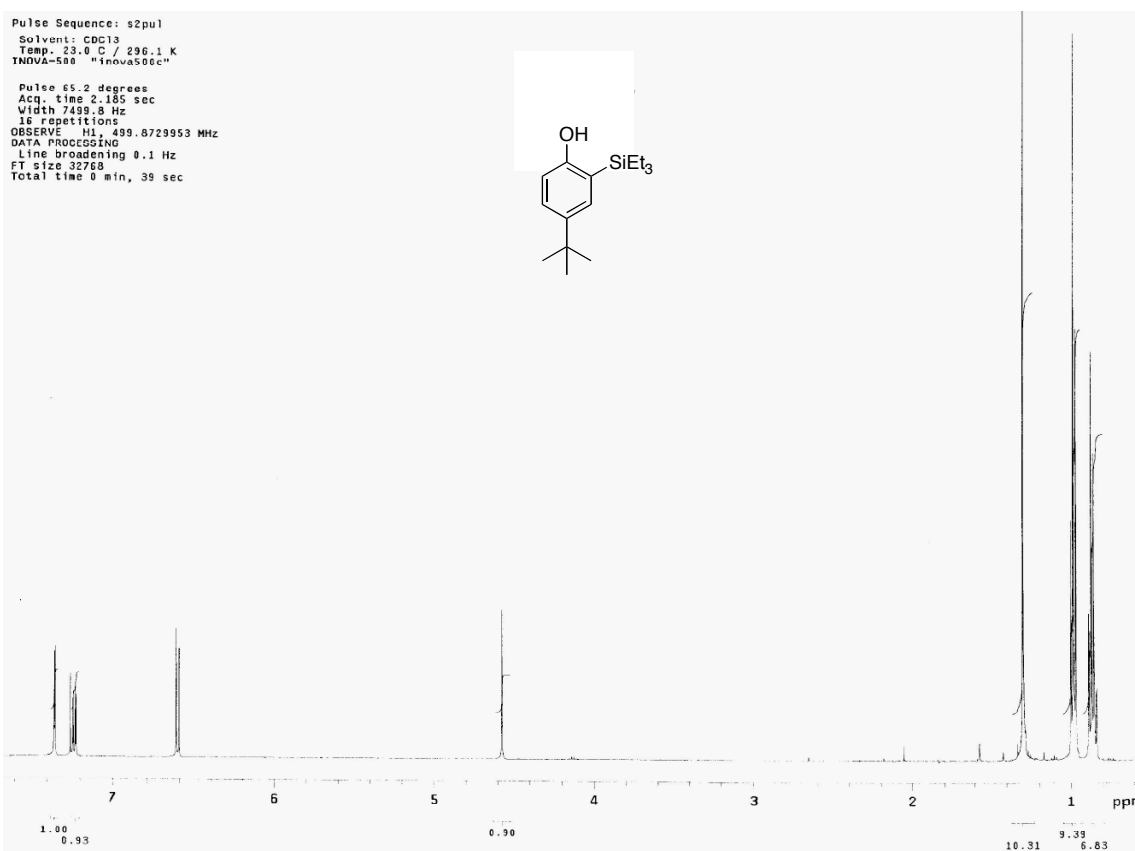

Pulse Sequence: s2pu1  
Solvent: CDCl3  
Temp: 23.0 C / 296.1 K  
User: 1-14-87  
INOVA-500 "inova500c"  
  
Pulse 34.6 degrees  
Acq. time 1.092 sec  
Width 29996.3 Hz  
224 repetitions  
OBSERVE C13, 125.6931657 MHz  
DECOUPLE H1, 499.8754943 MHz  
Power 45 dB  
continuously on  
VALTZ-16 modulated  
DATA PROCESSING  
Line broadening 1.0 Hz  
FT size 65536  
Total time 18 min, 49 sec

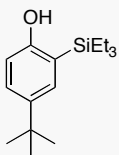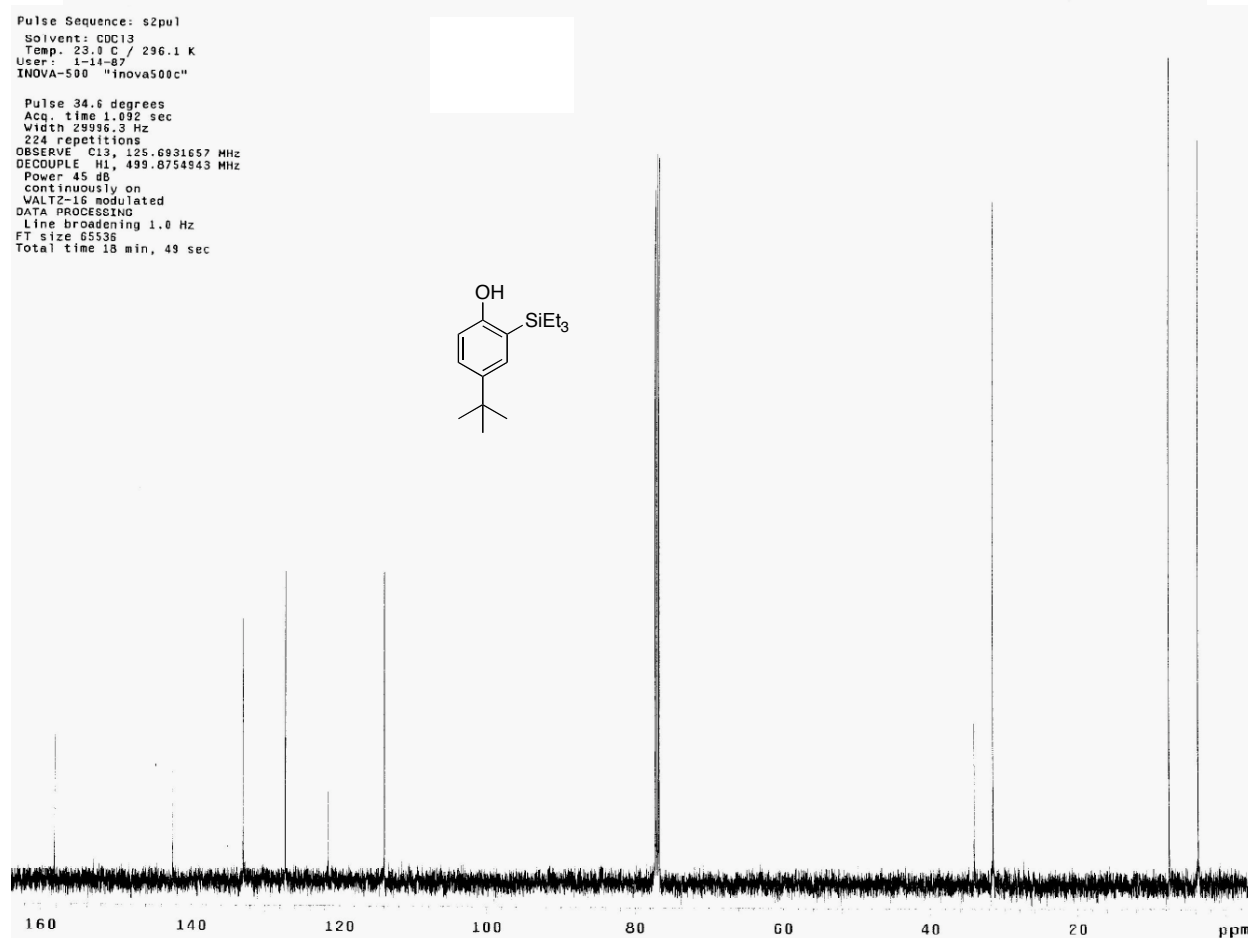

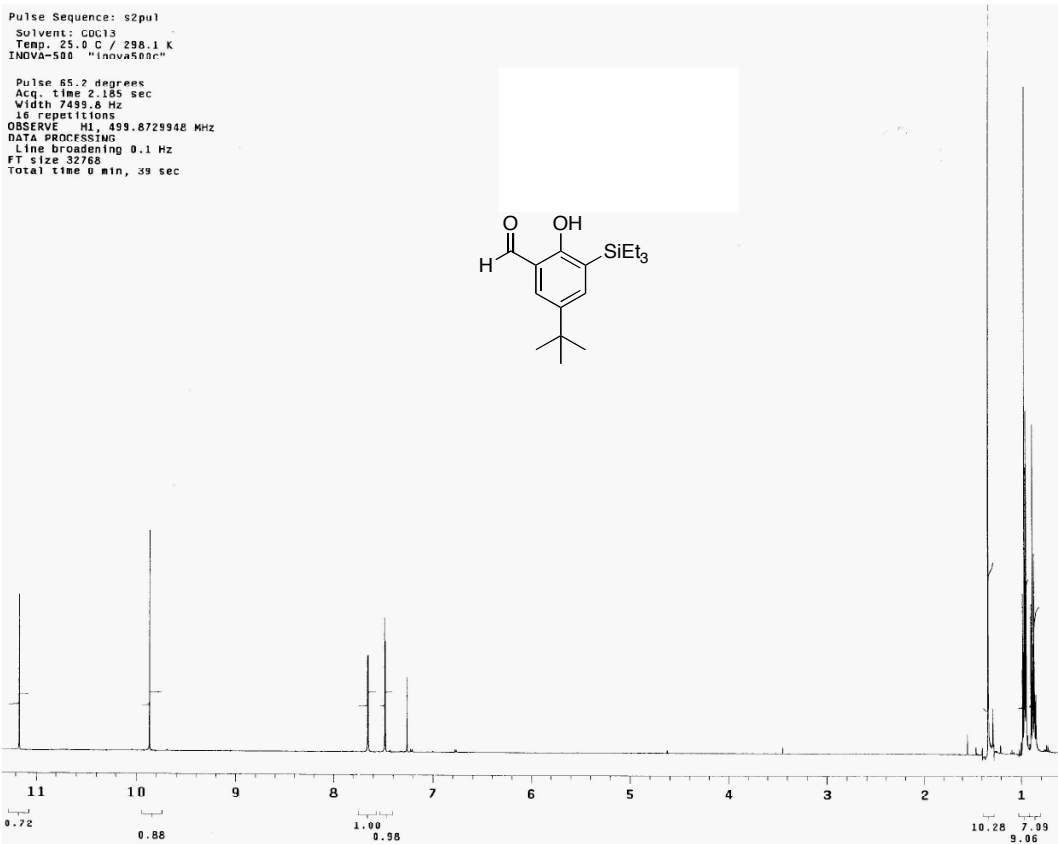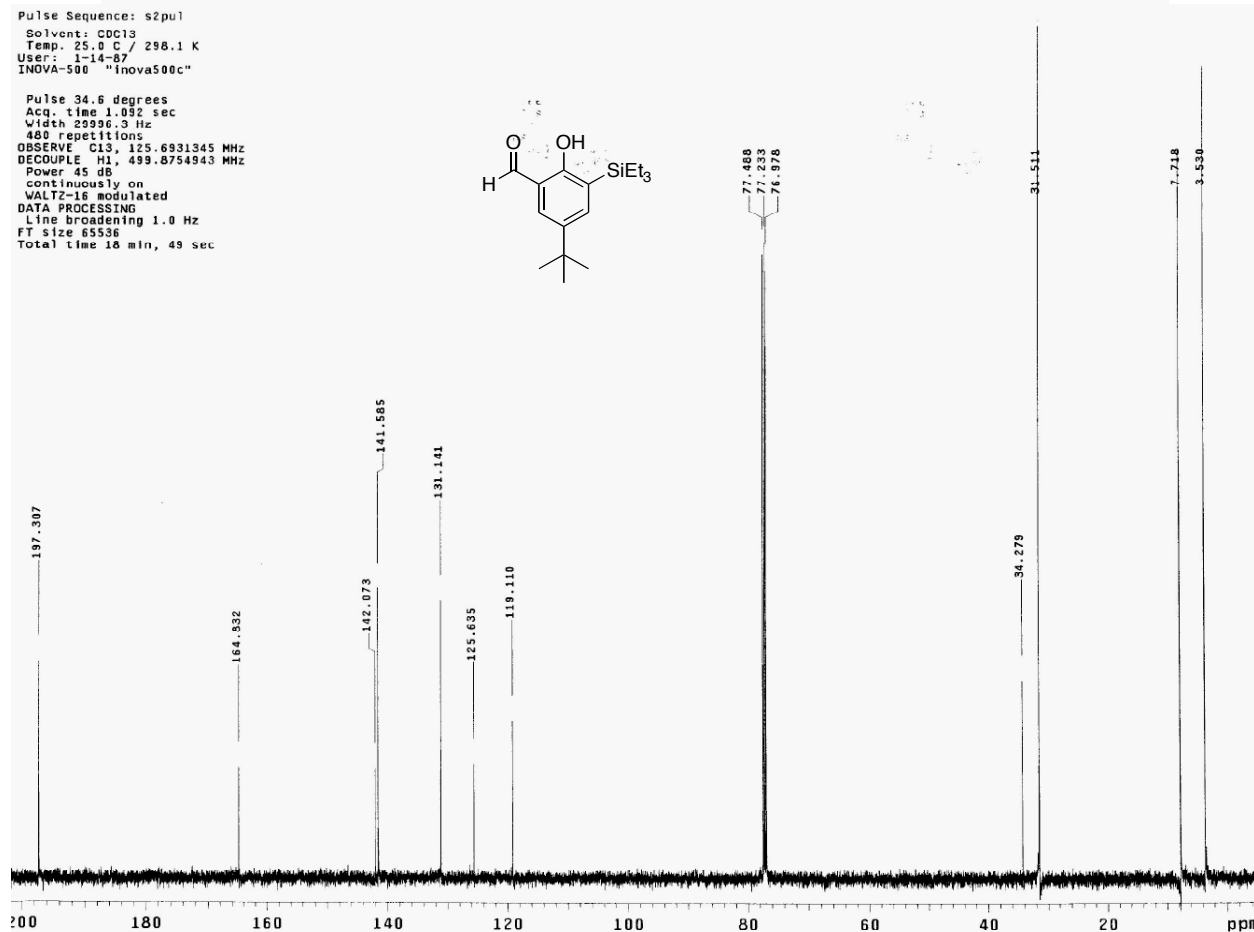

Pulse Sequence: s2pul  
Solvent: CDCl3  
Temp. 25.0 C / 298.1 K  
INOVA-500 "inova500c"

Pulse 65.2 degrees  
Acq. time 2.180 sec  
Width 15000.9 Hz  
16 repetitions  
OBSERVE H1, 499.8728953 MHz  
DATA PROCESSING  
Line broadening 0.1 Hz  
FT size 65536  
Total time 0 min, 39 sec

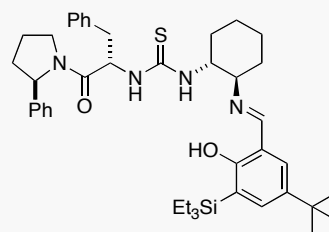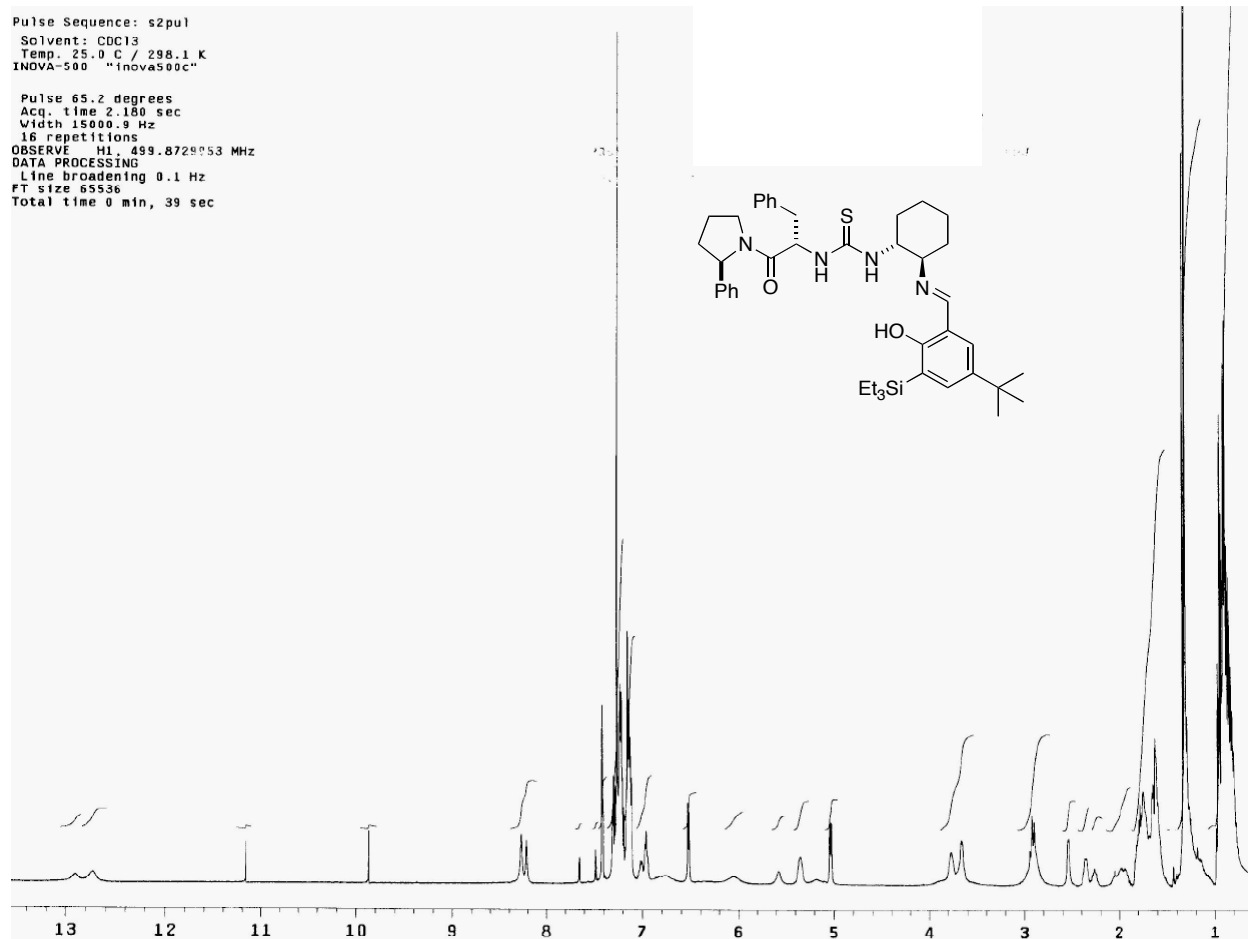

Pulse Sequence: s2pul  
Solvent: CDCl3  
Temp. 25.0 C / 298.1 K  
User: 1-14-07  
INOVA-500 "inova500c"

Pulse 34.6 degrees  
Acq. time 1.092 sec  
Width 29936.3 Hz  
1312 repetitions  
OBSERVE C13, 125.6931675 MHz  
DECOUPLE H1, 499.8754943 MHz  
Power 45 dB  
continuously on  
WALTZ-16 modulated  
DATA PROCESSING  
Line broadening 1.0 Hz  
FT size 65536  
Total time 3 hr, 3 min, 35 sec

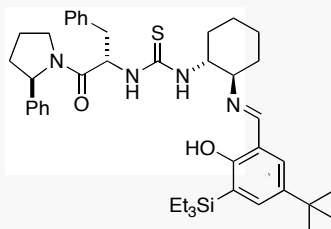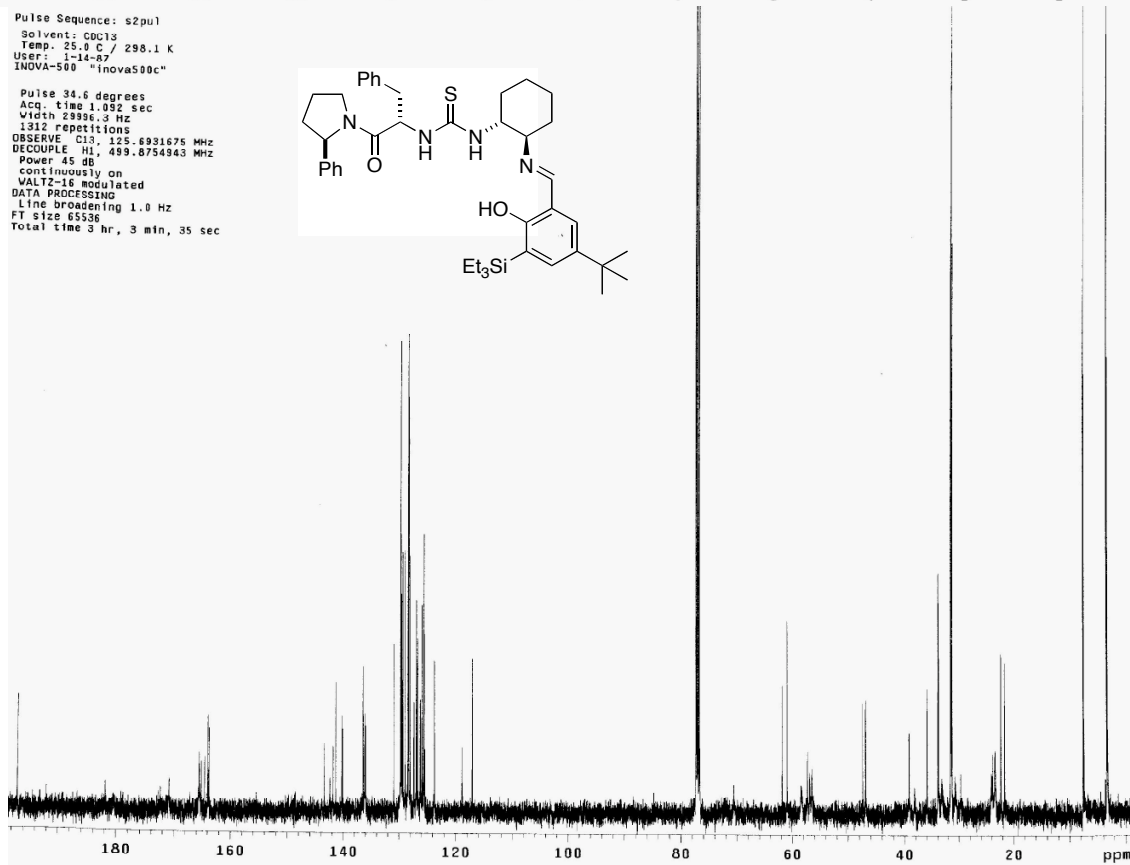

H.  $^1\text{H}$  and  $^{13}\text{C}$  NMR of chlorolactam intermediate 7 and related compounds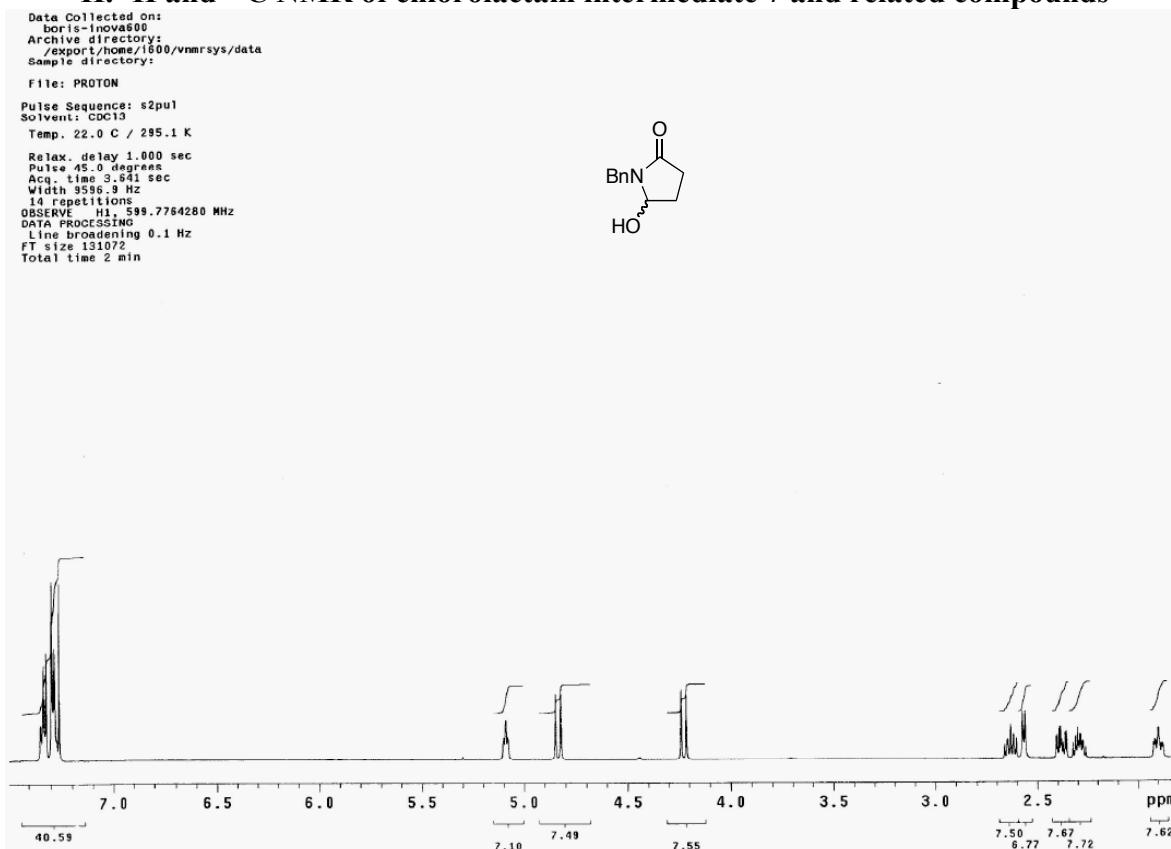

Pulse Sequence: s2pul  
Solvent: CDCl<sub>3</sub>  
Temp. 25.0 C / 298.1 K  
User: 1-14-87  
INOVA-500 "inova500c"

Relax. delay 1.000 sec  
Pulse 34.6 degrees  
Acq. time 1.992 sec  
Width 29996.3 Hz  
118 repetitions  
OBSERVE C13, 125.6931657 MHz  
DECOUPLE H1, 499.8754943 MHz  
Power 45 dB  
continuously on  
VALTZ-16 modulated  
DATA PROCESSING  
Line broadening 1.0 Hz  
FT size 65536  
Total time 2 hr, 20 min, 9 sec

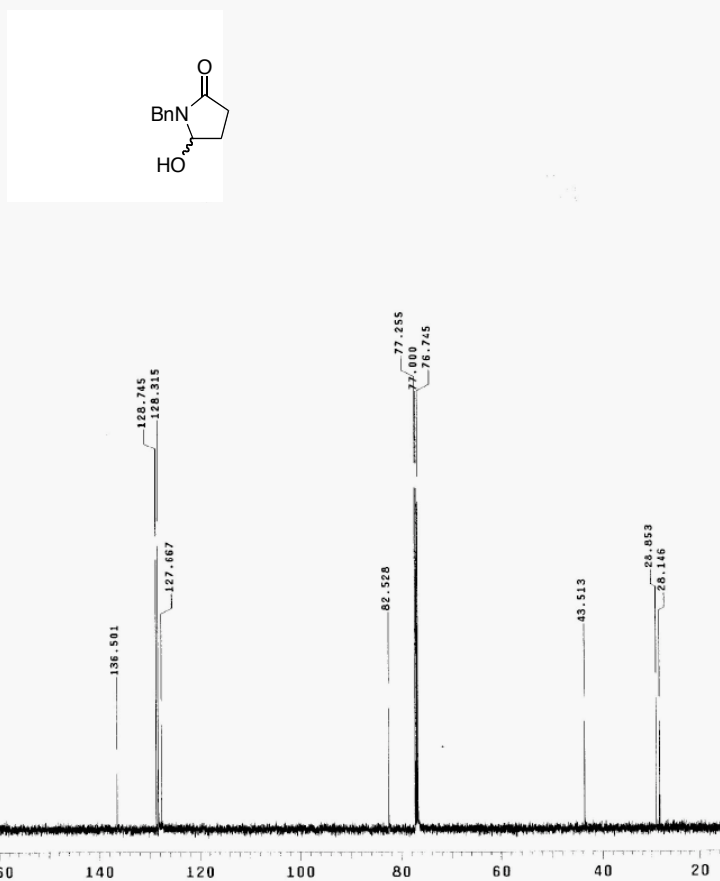

Data Collected on:  
boris-inova600  
Archive directory:  
/export/home/1600/vnmrsys/data  
Sample directory:

File: PROTON

Pulse Sequence: s2pu1  
Solvent: CDCl3  
Temp. 22.0 C / 285.1 K

Relax. delay 1.000 sec  
Pulse 45.0 degrees  
Acq. time 3.641 sec  
Width 9586.9 Hz  
4 repetitions  
OBSERVE H1, 599.7764264 MHz  
DATA PROCESSING  
Line broadening 0.1 Hz  
FT size 131072  
Total time 2 min

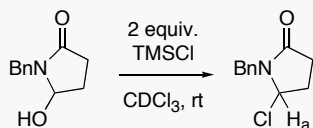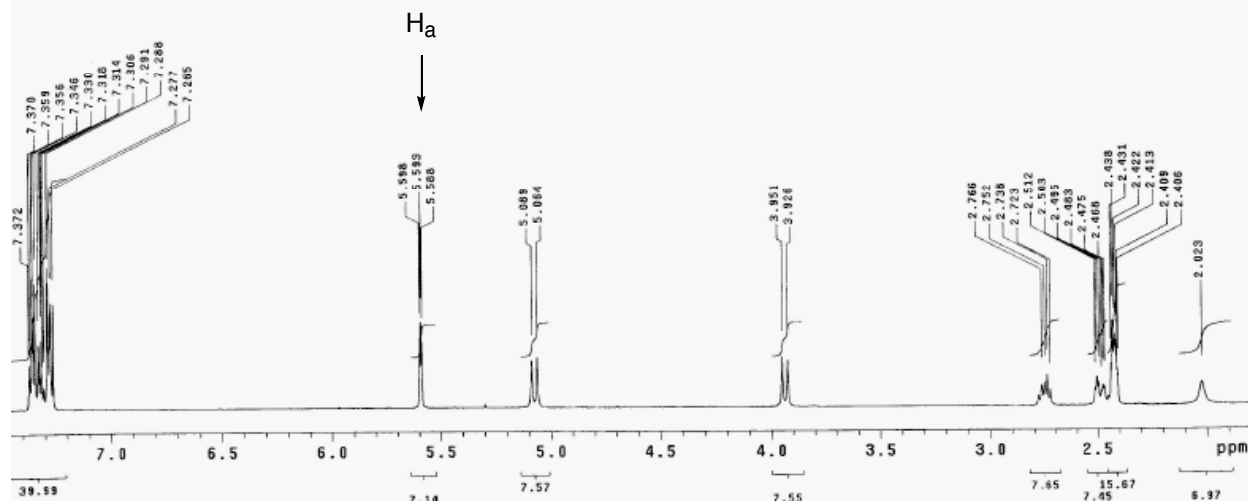

exp2 s2pu1

|             |             |            |          |
|-------------|-------------|------------|----------|
| date        | Apr 28 2007 | dfrq       | 500.176  |
| solvent     | CDCl3       | dn         | H1       |
| file        |             | dpwr       | 38       |
| ACQUISITION | exp         | dof        | 0        |
| sfrq        | 125.781     | dm         | yyy      |
| tn          | C13         | dmm        | w        |
| at          | 1.170       | def        | 15970    |
| np          | 85536       | dsq        |          |
| sw          | 28001.4     | dres       | 1.0      |
| fb          | 15000       | homo       | n        |
| bs          | 2           | temp       | 22.0     |
| tpwr        | 57          | PROCESSING |          |
| pw          | 8.0         | lb         | 1.00     |
| d1          | 1.000       | wtfile     |          |
| tdf         | 0           | proc       | ft       |
| nt          | 1000        | fn         | not used |
| ct          | 86          | math       | f        |
| alock       | n           | warr       |          |
| gain        | 56          | wexp       |          |
| ll          | n           | wbs        |          |
| ln          | n           | wnt        |          |
| dp          | y           |            |          |
| hs          | nn          |            |          |
| DISPLAY     |             |            |          |
| sp          | 2064.5      |            |          |
| wp          | 28000.5     |            |          |
| vs          | 1640        |            |          |
| sc          | 0           |            |          |
| wc          | 250         |            |          |
| h2nm        | 112.00      |            |          |
| ls          | 500.00      |            |          |
| rfl         | 11789.5     |            |          |
| rfp         | 9684.2      |            |          |
| th          |             |            |          |
| lms         | 100.000     |            |          |
| al          | cdc         | ph         |          |

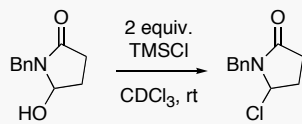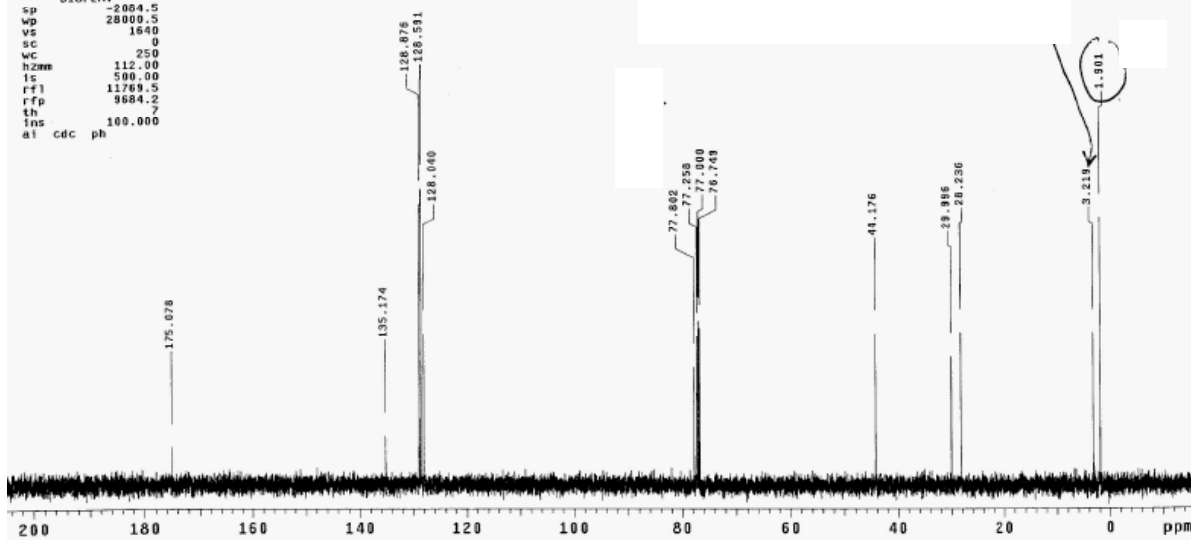

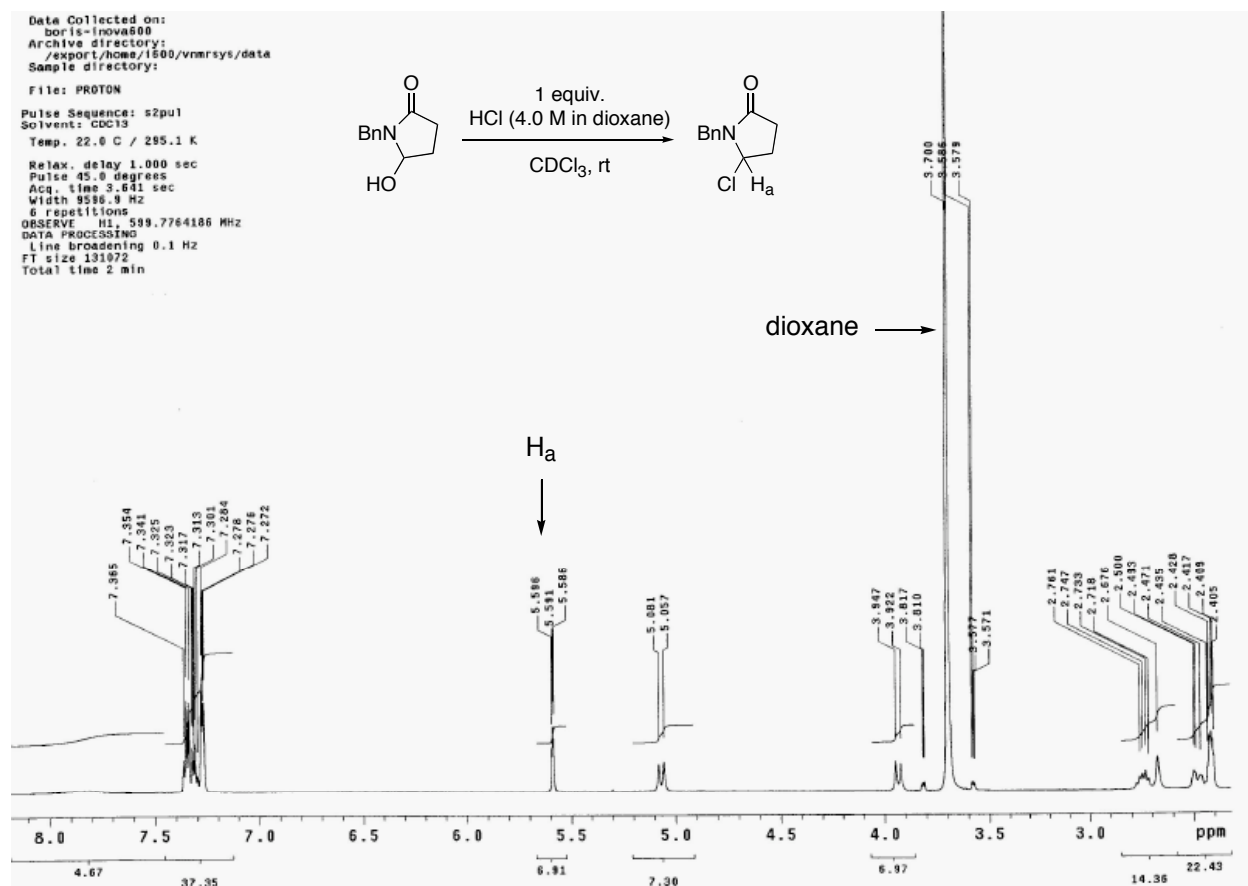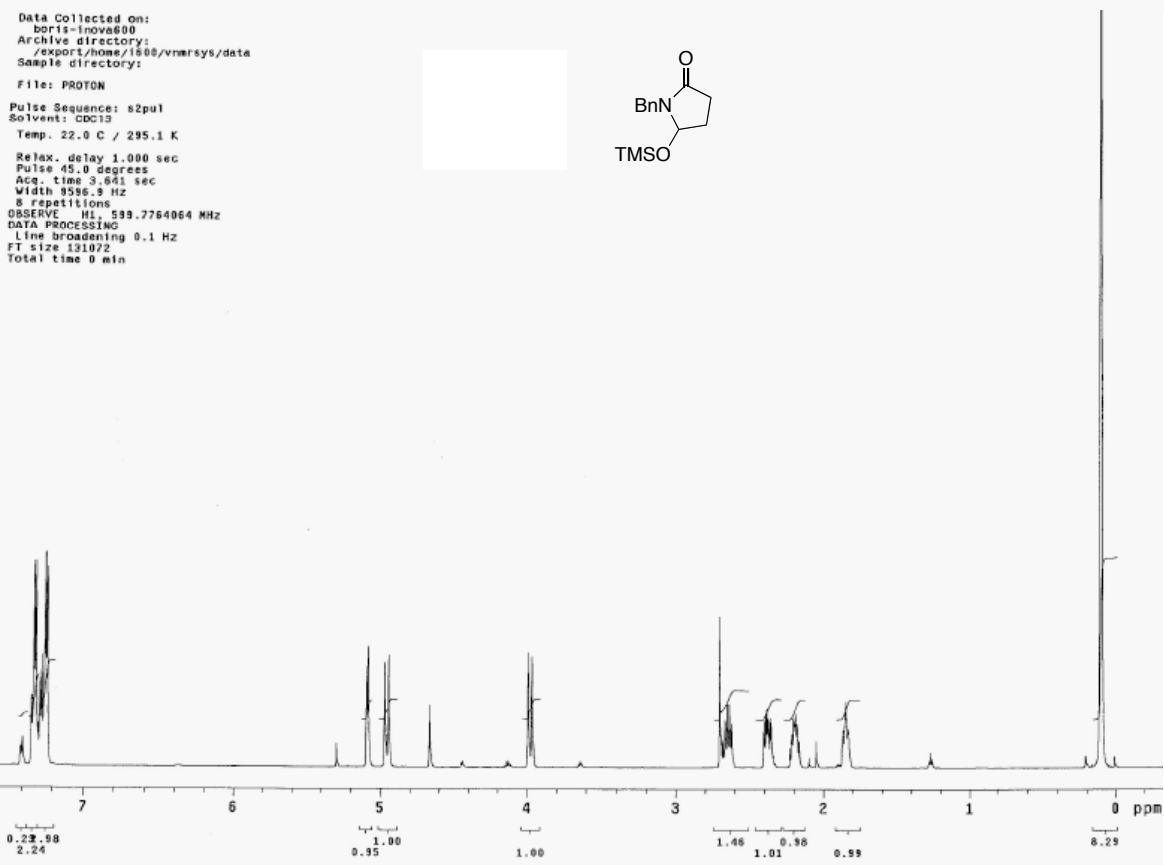

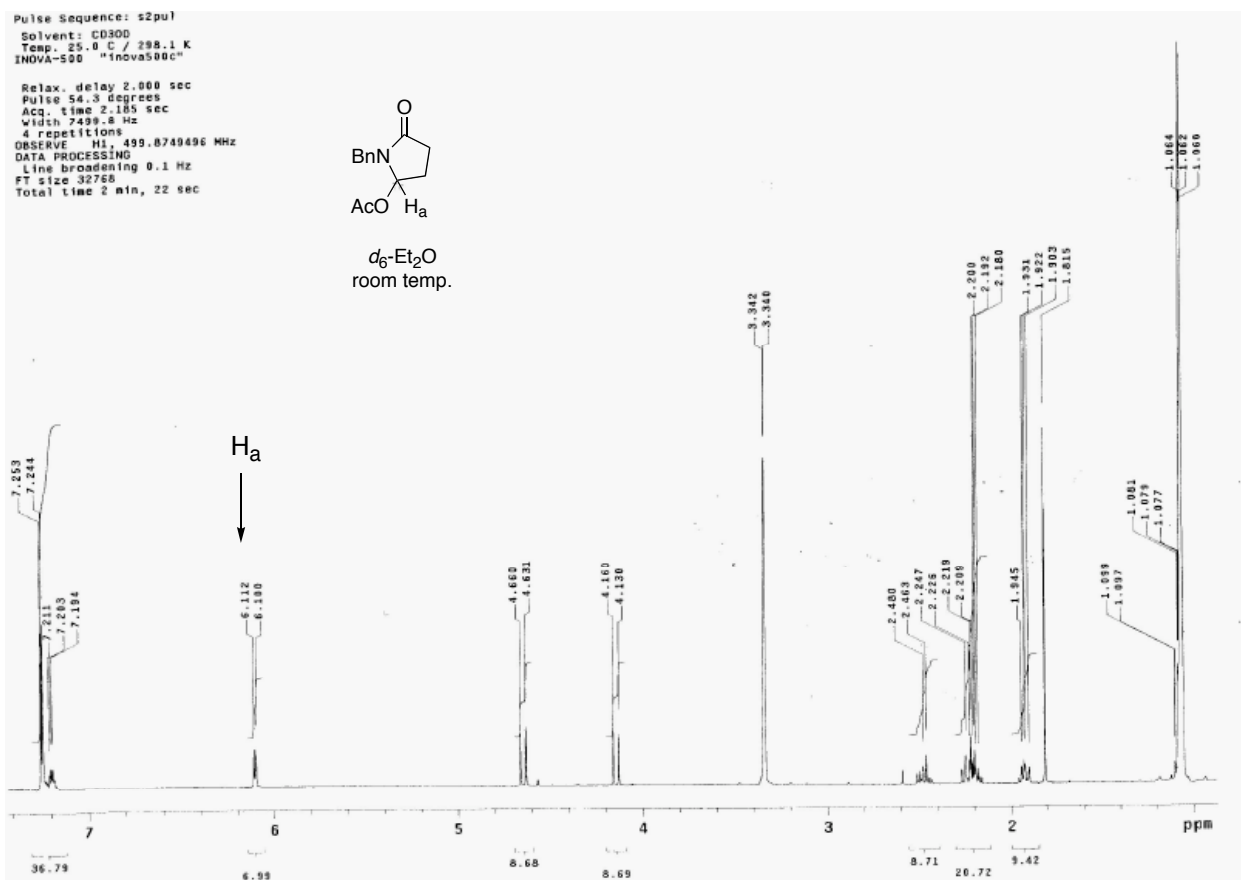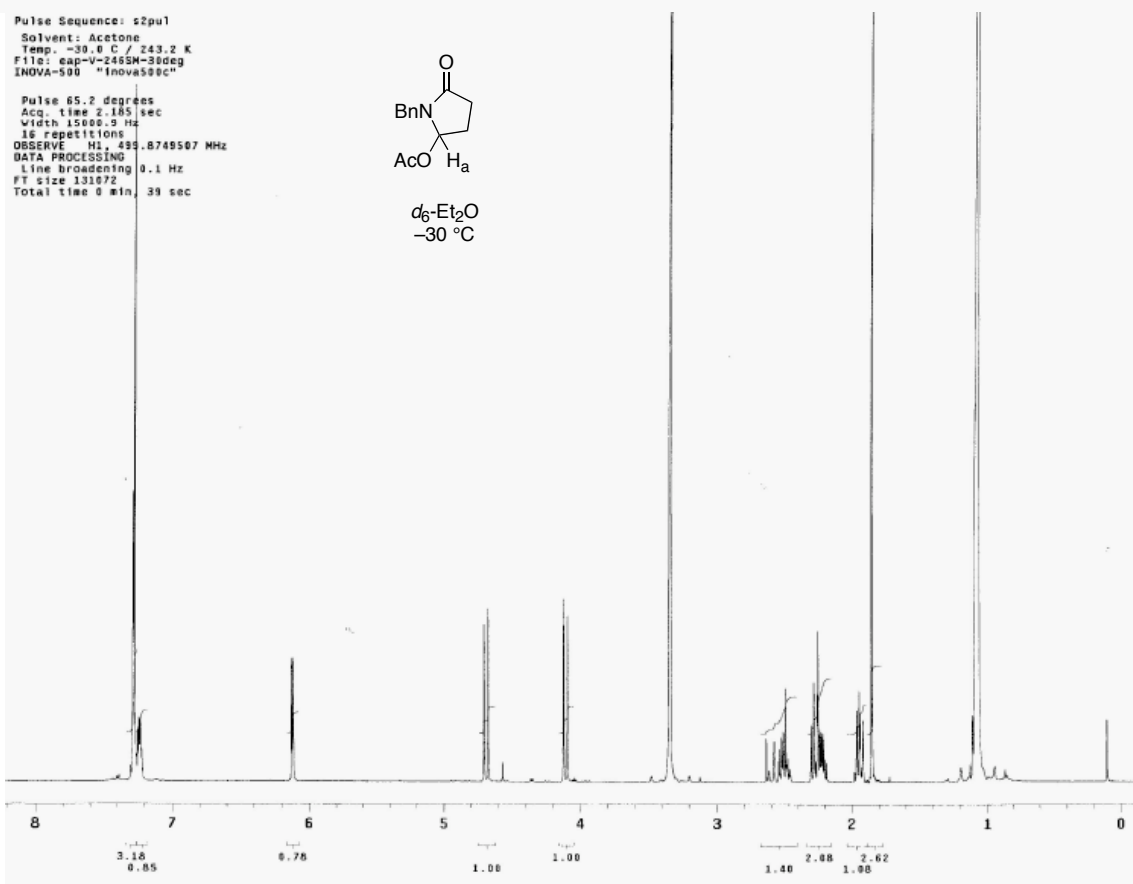

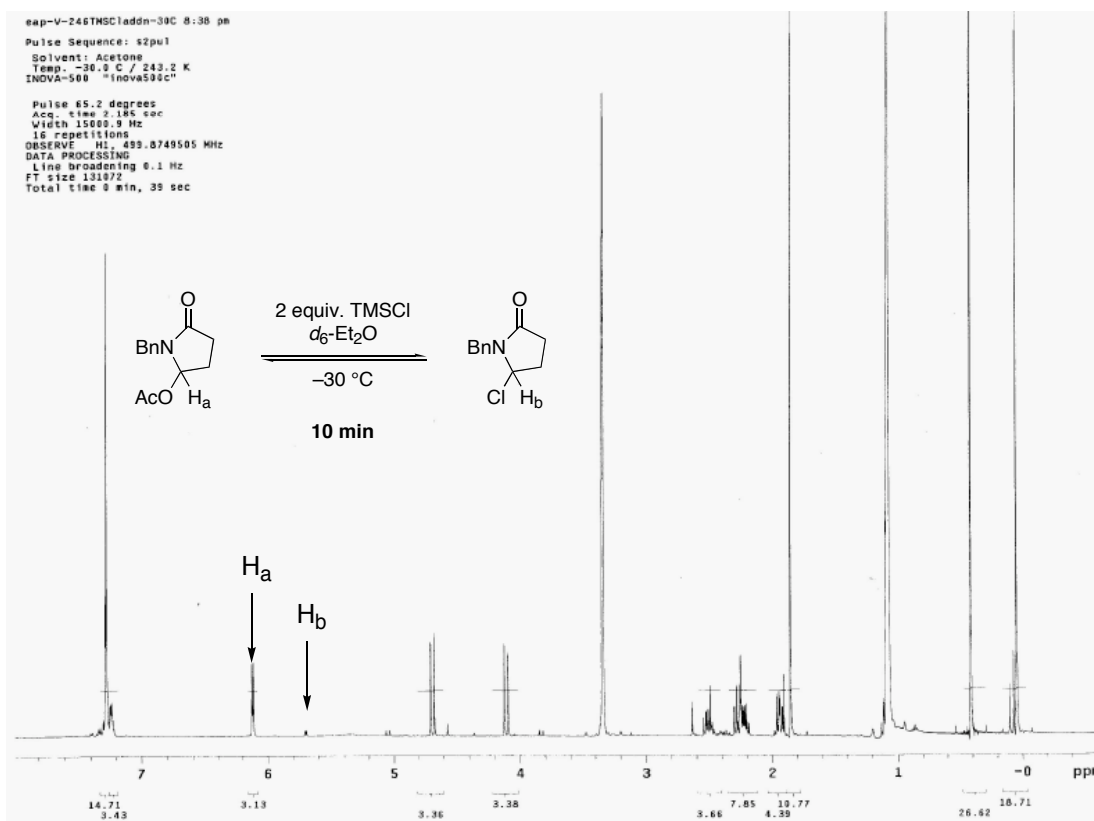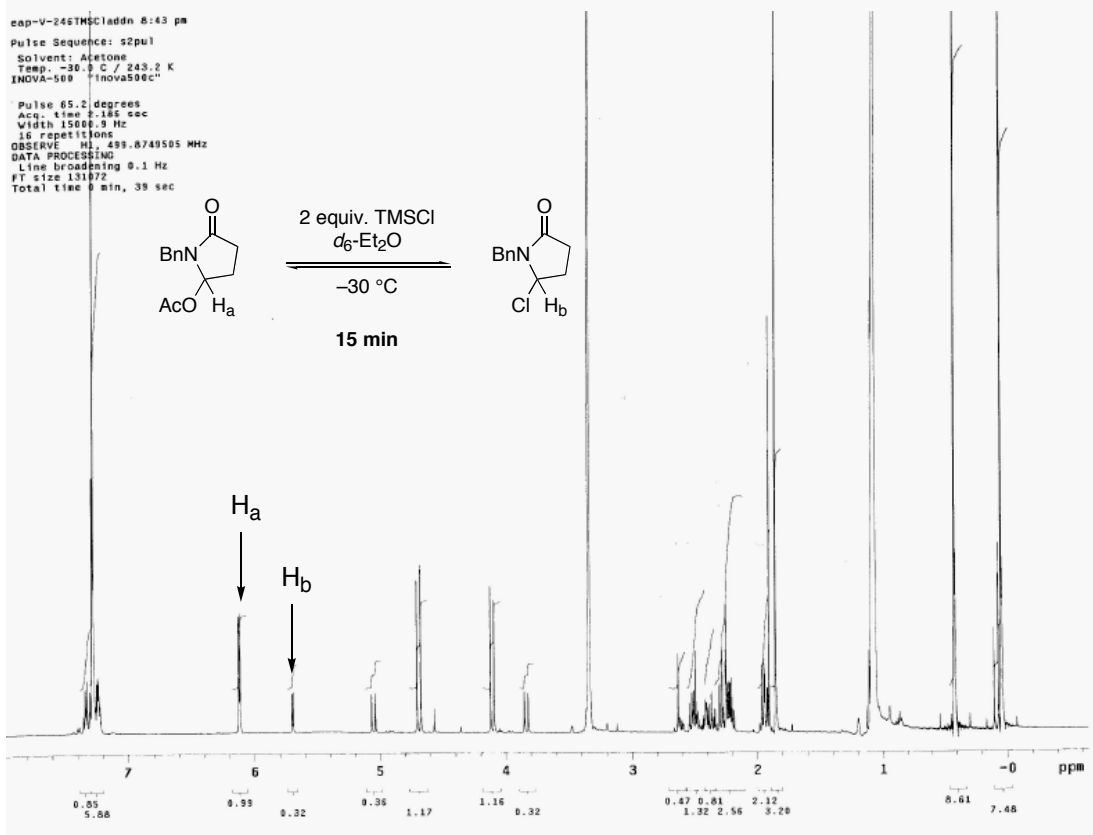



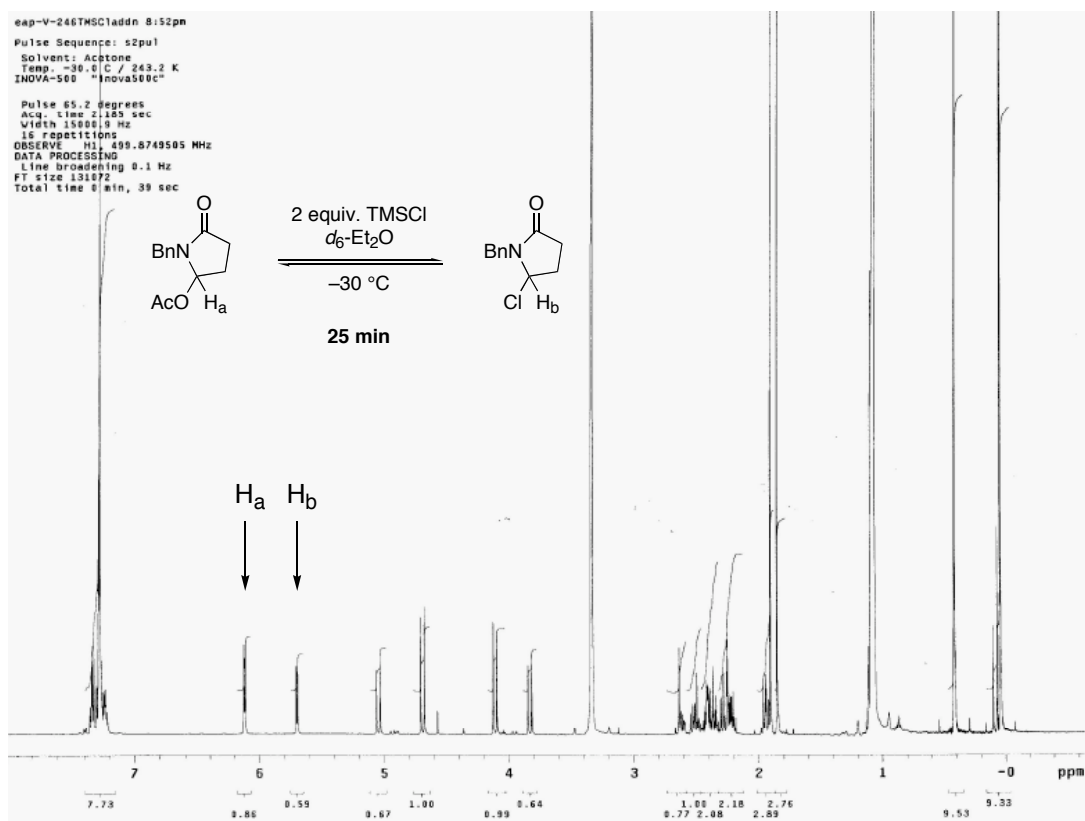

Supplement: NIHMS162524-supplement-1.pdf [file NIHMS162524-supplement-1.pdf]
